# Supplementary material for: Computational analyses reveal a prognostic impact of TULP3 as a transcriptional master regulator in pancreatic ductal adenocarcinoma
Source: Royal Society of Chemistry journal article supplement (doi:10.1039/c3mb70590k), 2014-02-03
Supplement: c3mb70590k2.pdf [file c3mb70590k2.pdf]

**Supplementary Table S1.** Hits of *TULP3 regulon*. The differentially expressed genes, from GSE16515 microarray data, was identified by Limma R-package and assigned to each *regulon* by Master Regulator Analysis (MRA).

| <b>Probe</b> | <b>Entrez</b> | <b>Gene Symbol</b>  | <b>p-value</b> |
|--------------|---------------|---------------------|----------------|
| 203774_at    | 4548          | <i>MTR</i>          | 1.01e-09       |
| 74694_s_at   | 79874         | <i>RABEP2</i>       | 2.08e-09       |
| 208859_s_at  | 546           | <i>ATRX</i>         | 8.46e-09       |
| 214305_s_at  | 23451         | <i>SF3B1</i>        | 1.83e-08       |
| 225178_at    | 151613        | <i>TTC14</i>        | 2.33e-08       |
| 242352_at    | 25836         | <i>NIPBL</i>        | 3.69e-08       |
| 211257_x_at  | 27332         | <i>ZNF638</i>       | 5.05e-08       |
| 201996_s_at  | 23013         | <i>SPEN</i>         | 5.79e-08       |
| 223139_s_at  | 170506        | <i>DHX36</i>        | 6.72e-08       |
| 213775_x_at  | 27332         | <i>ZNF638</i>       | 8.52e-08       |
| 203341_at    | 10153         | <i>CEBPZ</i>        | 8.74e-08       |
| 213850_s_at  | 9169          | <i>SCAF11</i>       | 9.10e-08       |
| 201070_x_at  | 23451         | <i>SF3B1</i>        | 9.49e-08       |
| 203719_at    | 2067          | <i>ERCC1</i>        | 1.16e-07       |
| 220572_at    | 100506282     | <i>LOC100506282</i> | 1.28e-07       |
| 227833_s_at  | 114785        | <i>MBD6</i>         | 1.51e-07       |
| 242829_x_at  | 26224         | <i>FBXL3</i>        | 1.75e-07       |
| 225173_at    | 93663         | <i>ARHGAP18</i>     | 2.13e-07       |
| 232216_at    | 10730         | <i>YME1L1</i>       | 2.55e-07       |
| 229342_at    | 55421         | <i>CI7orf85</i>     | 2.61e-07       |
| 205187_at    | 4090          | <i>SMAD5</i>        | 2.64e-07       |
| 233656_s_at  | 51542         | <i>VPS54</i>        | 2.87e-07       |
| 203491_s_at  | 9702          | <i>CEP57</i>        | 3.02e-07       |
| 212027_at    | 58517         | <i>RBM25</i>        | 3.41e-07       |
| 206555_s_at  | 55623         | <i>THUMPD1</i>      | 3.76e-07       |
| 226921_at    | 197131        | <i>UBR1</i>         | 4.07e-07       |
| 232179_at    | 158863        | <i>LOC158863</i>    | 4.25e-07       |
| 212994_at    | 57187         | <i>THOC2</i>        | 5.08e-07       |
| 238130_at    | 84901         | <i>NFATC2IP</i>     | 5.17e-07       |
| 235409_at    | 23269         | <i>MGA</i>          | 6.69e-07       |
| 208610_s_at  | 23524         | <i>SRRM2</i>        | 6.99e-07       |
| 212388_at    | 23358         | <i>USP24</i>        | 7.27e-07       |
| 220526_s_at  | 55052         | <i>MRPL20</i>       | 7.33e-07       |
| 212507_at    | 23505         | <i>TMEM131</i>      | 8.44e-07       |

|              |        |                 |          |
|--------------|--------|-----------------|----------|
| 237577_at    | 57092  | <i>PCNP</i>     | 8.94e-07 |
| 224736_at    | 55749  | <i>CCAR1</i>    | 9.22e-07 |
| 205596_s_at  | 64750  | <i>SMURF2</i>   | 9.38e-07 |
| 233819_s_at  | 26046  | <i>LTN1</i>     | 9.71e-07 |
| 205171_at    | 5775   | <i>PTPN4</i>    | 1.00e-06 |
| 222119_s_at  | 80204  | <i>FBXO11</i>   | 1.02e-06 |
| 211974_x_at  | 3516   | <i>RBPJ</i>     | 1.08e-06 |
| 211185_s_at  | 23451  | <i>SF3B1</i>    | 1.09e-06 |
| 236243_at    | 79670  | <i>ZCCHC6</i>   | 1.10e-06 |
| 43544_at     | 10025  | <i>MED16</i>    | 1.29e-06 |
| 222163_s_at  | 79029  | <i>SPATA5L1</i> | 1.31e-06 |
| 209024_s_at  | 10492  | <i>SYNCRIP</i>  | 1.32e-06 |
| 201867_s_at  | 6907   | <i>TBL1X</i>    | 1.33e-06 |
| 1557067_s_at | 55692  | <i>LUC7L</i>    | 1.41e-06 |
| 212754_s_at  | 23041  | <i>MON2</i>     | 1.54e-06 |
| 213918_s_at  | 25836  | <i>NIPBL</i>    | 1.58e-06 |
| 209376_x_at  | 9169   | <i>SCAF11</i>   | 1.60e-06 |
| 222266_at    | 8725   | <i>UR11</i>     | 1.66e-06 |
| 201142_at    | 1965   | <i>EIF2S1</i>   | 1.75e-06 |
| 208630_at    | 3030   | <i>HADHA</i>    | 1.75e-06 |
| 201371_s_at  | 8452   | <i>CUL3</i>     | 1.82e-06 |
| 225089_at    | 55230  | <i>USP40</i>    | 1.88e-06 |
| 213010_at    | 112464 | <i>PRKCDBP</i>  | 1.93e-06 |
| 220072_at    | 79848  | <i>CSPP1</i>    | 1.97e-06 |
| 226503_at    | 55183  | <i>RIF1</i>     | 1.99e-06 |
| 204171_at    | 6198   | <i>RPS6KB1</i>  | 2.01e-06 |
| 1568815_a_at | 79009  | <i>DDX50</i>    | 2.04e-06 |
| 222420_s_at  | 7328   | <i>UBE2H</i>    | 2.05e-06 |
| 208995_s_at  | 9360   | <i>PPIG</i>     | 2.08e-06 |
| 218409_s_at  | 64215  | <i>DNAJC1</i>   | 2.13e-06 |
| 222679_s_at  | 54165  | <i>DCUN1D1</i>  | 2.14e-06 |
| 201232_s_at  | 5719   | <i>PSMD13</i>   | 2.16e-06 |
| 241955_at    | 25831  | <i>HECTD1</i>   | 2.26e-06 |
| 214363_s_at  | 9782   | <i>MATR3</i>    | 2.29e-06 |
| 222439_s_at  | 9967   | <i>THRAP3</i>   | 2.39e-06 |
| 227205_at    | 6872   | <i>TAF1</i>     | 2.45e-06 |
| 218315_s_at  | 51654  | <i>CDK5RAP1</i> | 2.46e-06 |
| 200842_s_at  | 2058   | <i>EPRS</i>     | 2.48e-06 |
| 222122_s_at  | 57187  | <i>THOC2</i>    | 2.55e-06 |
| 236620_at    | 55183  | <i>RIF1</i>     | 2.59e-06 |

|              |           |                  |          |
|--------------|-----------|------------------|----------|
| 242439_s_at  | 171023    | <i>ASXL1</i>     | 2.59e-06 |
| 215092_s_at  | 10725     | <i>NFAT5</i>     | 2.60e-06 |
| 208900_s_at  | 7150      | <i>TOP1</i>      | 2.66e-06 |
| 225030_at    | 91272     | <i>BOD1</i>      | 2.67e-06 |
| 243648_at    | 100381270 | <i>ZBED6</i>     | 2.70e-06 |
| 244519_at    | 171023    | <i>ASXL1</i>     | 2.73e-06 |
| 207541_s_at  | 5394      | <i>EXOSC10</i>   | 2.77e-06 |
| 223016_x_at  | 9406      | <i>ZRANB2</i>    | 2.80e-06 |
| 231016_s_at  | 405       | <i>ARNT</i>      | 2.82e-06 |
| 235009_at    | 259282    | <i>BOD1L1</i>    | 2.89e-06 |
| 1567214_a_at | 5411      | <i>PNN</i>       | 3.03e-06 |
| 201227_s_at  | 4714      | <i>NDUFB8</i>    | 3.04e-06 |
| 218423_x_at  | 51542     | <i>VPS54</i>     | 3.09e-06 |
| 226562_at    | 146050    | <i>ZSCAN29</i>   | 3.09e-06 |
| 212740_at    | 30849     | <i>PIK3R4</i>    | 3.14e-06 |
| 214356_s_at  | 23392     | <i>KIAA0368</i>  | 3.18e-06 |
| 208993_s_at  | 9360      | <i>PPIG</i>      | 3.21e-06 |
| 1554342_s_at | 113510    | <i>HELQ</i>      | 3.22e-06 |
| 1557895_at   | 400579    | <i>FLJ35934</i>  | 3.30e-06 |
| 204524_at    | 5170      | <i>PDPK1</i>     | 3.32e-06 |
| 37254_at     | 7692      | <i>ZNF133</i>    | 3.36e-06 |
| 210054_at    | 79441     | <i>HAUS3</i>     | 3.37e-06 |
| 209258_s_at  | 9126      | <i>SMC3</i>      | 3.39e-06 |
| 212451_at    | 9728      | <i>SECISBP2L</i> | 3.63e-06 |
| 219307_at    | 57107     | <i>PDSS2</i>     | 3.64e-06 |
| 200077_s_at  | 4946      | <i>OAZ1</i>      | 3.76e-06 |
| 243496_at    | 22931     | <i>RAB18</i>     | 3.79e-06 |
| 217842_at    | 51631     | <i>LUC7L2</i>    | 3.93e-06 |
| 214314_s_at  | 9669      | <i>EIF5B</i>     | 4.07e-06 |
| 225852_at    | 26057     | <i>ANKRD17</i>   | 4.46e-06 |
| 219387_at    | 55704     | <i>CCDC88A</i>   | 4.47e-06 |
| 213097_s_at  | 27000     | <i>DNAJC2</i>    | 4.51e-06 |
| 230180_at    | 10521     | <i>DDX17</i>     | 4.68e-06 |
| 244024_at    | 7569      | <i>ZNF182</i>    | 4.77e-06 |
| 209654_at    | 23379     | <i>KIAA0947</i>  | 4.78e-06 |
| 202491_s_at  | 8518      | <i>IKBKAP</i>    | 4.86e-06 |
| 202570_s_at  | 22839     | <i>DLGAP4</i>    | 4.96e-06 |
| 222667_s_at  | 55870     | <i>ASH1L</i>     | 5.11e-06 |
| 200882_s_at  | 5710      | <i>PSMD4</i>     | 5.12e-06 |
| 213311_s_at  | 22980     | <i>TCF25</i>     | 5.25e-06 |

|              |        |                 |          |
|--------------|--------|-----------------|----------|
| 1552330_at   | 92806  | <i>CENPBD1</i>  | 5.25e-06 |
| 1557278_s_at | 3842   | <i>TNPO1</i>    | 5.27e-06 |
| 209226_s_at  | 3842   | <i>TNPO1</i>    | 5.28e-06 |
| 223677_at    | 83734  | <i>ATG10</i>    | 5.29e-06 |
| 229586_at    | 80205  | <i>CHD9</i>     | 5.31e-06 |
| 220746_s_at  | 51720  | <i>UIMC1</i>    | 5.46e-06 |
| 232648_at    | 5684   | <i>PSMA3</i>    | 5.68e-06 |
| 219193_at    | 55100  | <i>WDR70</i>    | 5.79e-06 |
| 202414_at    | 2073   | <i>ERCC5</i>    | 5.82e-06 |
| 203318_s_at  | 7707   | <i>ZNF148</i>   | 5.84e-06 |
| 213718_at    | 5936   | <i>RBM4</i>     | 5.90e-06 |
| 238350_at    | 254048 | <i>UBN2</i>     | 6.03e-06 |
| 219833_s_at  | 114327 | <i>EFHC1</i>    | 6.13e-06 |
| 203468_at    | 8558   | <i>CDK10</i>    | 6.16e-06 |
| 221514_at    | 10813  | <i>UTP14A</i>   | 6.32e-06 |
| 200633_at    | 7314   | <i>UBB</i>      | 6.36e-06 |
| 229398_at    | 22931  | <i>RAB18</i>    | 6.61e-06 |
| 223160_s_at  | 55671  | <i>SMEK1</i>    | 6.62e-06 |
| 237560_at    | 64969  | <i>MRPS5</i>    | 6.63e-06 |
| 212718_at    | 10914  | <i>PAPOLA</i>   | 6.67e-06 |
| 219426_at    | 192669 | <i>EIF2C3</i>   | 6.69e-06 |
| 224616_at    | 1783   | <i>DYNC1LI2</i> | 6.72e-06 |
| 32091_at     | 9673   | <i>SLC25A44</i> | 6.92e-06 |
| 224854_s_at  | 57606  | <i>SLAIN2</i>   | 7.01e-06 |
| 1555913_at   | 54856  | <i>GON4L</i>    | 7.23e-06 |
| 209669_s_at  | 26135  | <i>SERBP1</i>   | 7.38e-06 |
| 239243_at    | 27332  | <i>ZNF638</i>   | 7.38e-06 |
| 1557384_at   | 7690   | <i>ZNF131</i>   | 7.43e-06 |
| 219009_at    | 60686  | <i>C14orf93</i> | 7.55e-06 |
| 221683_s_at  | 80184  | <i>CEP290</i>   | 7.71e-06 |
| 201024_x_at  | 9669   | <i>EIF5B</i>    | 7.76e-06 |
| 207941_s_at  | 9584   | <i>RBM39</i>    | 7.78e-06 |
| 1552287_s_at | 172    | <i>AFG3L1P</i>  | 7.82e-06 |
| 241832_at    | 25940  | <i>FAM98A</i>   | 7.90e-06 |
| 217807_s_at  | 29997  | <i>GLTSCR2</i>  | 7.94e-06 |
| 202038_at    | 9354   | <i>UBE4A</i>    | 7.97e-06 |
| 201305_x_at  | 10541  | <i>ANP32B</i>   | 7.99e-06 |
| 222348_at    | 375449 | <i>MAST4</i>    | 8.01e-06 |
| 206500_s_at  | 55320  | <i>MIS18BP1</i> | 8.15e-06 |
| 233231_at    | 64087  | <i>MCCC2</i>    | 8.23e-06 |

|              |        |                |          |
|--------------|--------|----------------|----------|
| 225260_s_at  | 64983  | <i>MRPL32</i>  | 8.48e-06 |
| 233647_s_at  | 81602  | <i>CDADC1</i>  | 8.51e-06 |
| 239385_at    | 10342  | <i>TFG</i>     | 8.65e-06 |
| 212033_at    | 58517  | <i>RBM25</i>   | 8.67e-06 |
| 229353_s_at  | 64710  | <i>NUCKS1</i>  | 8.71e-06 |
| 235610_at    | 91801  | <i>ALKBH8</i>  | 8.88e-06 |
| 225916_at    | 7690   | <i>ZNF131</i>  | 8.96e-06 |
| 225386_s_at  | 92906  | <i>HNRPLL</i>  | 8.97e-06 |
| 225394_s_at  | 85437  | <i>ZCRB1</i>   | 9.01e-06 |
| 218428_s_at  | 51455  | <i>REVI</i>    | 9.09e-06 |
| 231718_at    | 10569  | <i>SLU7</i>    | 9.11e-06 |
| 201880_at    | 25820  | <i>ARIH1</i>   | 9.13e-06 |
| 238538_at    | 29123  | <i>ANKRD11</i> | 9.16e-06 |
| 210290_at    | 7727   | <i>ZNF174</i>  | 9.23e-06 |
| 222982_x_at  | 54407  | <i>SLC38A2</i> | 9.27e-06 |
| 202900_s_at  | 4927   | <i>NUP88</i>   | 9.30e-06 |
| 202227_s_at  | 10902  | <i>BRD8</i>    | 9.54e-06 |
| 1553252_a_at | 254065 | <i>BRWD3</i>   | 1.00e-05 |
| 215992_s_at  | 9693   | <i>RAPGEF2</i> | 1.02e-05 |
| 236241_at    | 51003  | <i>MED31</i>   | 1.05e-05 |
| 1554522_at   | 54805  | <i>CNNM2</i>   | 1.06e-05 |
| 226843_s_at  | 64282  | <i>PAPD5</i>   | 1.06e-05 |
| 235645_at    | 114799 | <i>ESCO1</i>   | 1.06e-05 |
| 213754_s_at  | 10605  | <i>PAIP1</i>   | 1.07e-05 |
| 212036_s_at  | 5411   | <i>PNN</i>     | 1.10e-05 |
| 204145_at    | 2483   | <i>FRG1</i>    | 1.11e-05 |
| 233759_s_at  | 57223  | <i>SMEK2</i>   | 1.11e-05 |
| 213064_at    | 79882  | <i>ZC3H14</i>  | 1.11e-05 |
| 238346_s_at  | 96764  | <i>TGS1</i>    | 1.11e-05 |
| 226826_at    | 134353 | <i>LSM11</i>   | 1.12e-05 |
| 212106_at    | 23197  | <i>FAF2</i>    | 1.13e-05 |
| 203803_at    | 51449  | <i>PCYOX1</i>  | 1.13e-05 |
| 218318_s_at  | 51701  | <i>NLK</i>     | 1.13e-05 |
| 216550_x_at  | 23253  | <i>ANKRD12</i> | 1.21e-05 |
| 209799_at    | 5562   | <i>PRKAA1</i>  | 1.22e-05 |
| 208942_s_at  | 7095   | <i>SEC62</i>   | 1.22e-05 |
| 216960_s_at  | 7692   | <i>ZNF133</i>  | 1.22e-05 |
| 201224_s_at  | 10250  | <i>SRRM1</i>   | 1.22e-05 |
| 226941_at    | 22926  | <i>ATF6</i>    | 1.22e-05 |
| 200086_s_at  | 1327   | <i>COX4I1</i>  | 1.23e-05 |

|              |        |                 |          |
|--------------|--------|-----------------|----------|
| 207983_s_at  | 10735  | <i>STAG2</i>    | 1.23e-05 |
| 208003_s_at  | 10725  | <i>NFAT5</i>    | 1.27e-05 |
| 214499_s_at  | 9774   | <i>BCLAF1</i>   | 1.30e-05 |
| 235435_at    | 132949 | <i>AASDH</i>    | 1.33e-05 |
| 230375_at    | 25957  | <i>PNISR</i>    | 1.34e-05 |
| 226082_s_at  | 57466  | <i>SCAF4</i>    | 1.34e-05 |
| 201519_at    | 9868   | <i>TOMM70A</i>  | 1.36e-05 |
| 237426_at    | 6672   | <i>SP100</i>    | 1.37e-05 |
| 207657_x_at  | 3842   | <i>TNPO1</i>    | 1.41e-05 |
| 204190_at    | 10208  | <i>USPL1</i>    | 1.41e-05 |
| 219317_at    | 11201  | <i>POLI</i>     | 1.42e-05 |
| 224331_s_at  | 64979  | <i>MRPL36</i>   | 1.42e-05 |
| 203162_s_at  | 10300  | <i>KATNB1</i>   | 1.44e-05 |
| 209659_s_at  | 8881   | <i>CDC16</i>    | 1.47e-05 |
| 207127_s_at  | 3189   | <i>HNRNPH3</i>  | 1.48e-05 |
| 219437_s_at  | 29123  | <i>ANKRD11</i>  | 1.52e-05 |
| 235729_at    | 84874  | <i>ZNF514</i>   | 1.53e-05 |
| 223236_at    | 84081  | <i>NSRP1</i>    | 1.54e-05 |
| 208249_s_at  | 23483  | <i>TGDS</i>     | 1.55e-05 |
| 205527_s_at  | 50628  | <i>GEMIN4</i>   | 1.55e-05 |
| 227351_at    | 730094 | <i>C16orf52</i> | 1.56e-05 |
| 203742_s_at  | 6996   | <i>TDG</i>      | 1.57e-05 |
| 227199_at    | 23181  | <i>DIP2A</i>    | 1.57e-05 |
| 219216_at    | 54465  | <i>ETAA1</i>    | 1.59e-05 |
| 223254_s_at  | 55632  | <i>G2E3</i>     | 1.59e-05 |
| 213128_s_at  | 7337   | <i>UBE3A</i>    | 1.61e-05 |
| 227538_at    | 9441   | <i>MED26</i>    | 1.65e-05 |
| 202605_at    | 2990   | <i>GUSB</i>     | 1.68e-05 |
| 233101_at    | 66036  | <i>MTMR9</i>    | 1.68e-05 |
| 203606_at    | 4726   | <i>NDUFS6</i>   | 1.69e-05 |
| 243801_x_at  | 51263  | <i>MRPL30</i>   | 1.73e-05 |
| 200875_s_at  | 10528  | <i>NOP56</i>    | 1.75e-05 |
| 209088_s_at  | 29855  | <i>UBN1</i>     | 1.77e-05 |
| 209268_at    | 11311  | <i>VPS45</i>    | 1.81e-05 |
| 218827_s_at  | 55125  | <i>CEP192</i>   | 1.81e-05 |
| 205178_s_at  | 5930   | <i>RBBP6</i>    | 1.85e-05 |
| 1558924_s_at | 6249   | <i>CLIP1</i>    | 1.89e-05 |
| 213026_at    | 9140   | <i>ATG12</i>    | 1.89e-05 |
| 226588_at    | 57703  | <i>CWC22</i>    | 1.90e-05 |
| 202083_s_at  | 6397   | <i>SEC14L1</i>  | 1.91e-05 |

|             |        |                  |          |
|-------------|--------|------------------|----------|
| 226422_at   | 51290  | <i>ERGIC2</i>    | 1.92e-05 |
| 225705_at   | 90799  | <i>CEP95</i>     | 1.92e-05 |
| 212177_at   | 25957  | <i>PNISR</i>     | 1.99e-05 |
| 241342_at   | 157378 | <i>TMEM65</i>    | 2.01e-05 |
| 228305_at   | 147929 | <i>ZNF565</i>    | 2.02e-05 |
| 222413_s_at | 58508  | <i>MLL3</i>      | 2.07e-05 |
| 201602_s_at | 4659   | <i>PPP1R12A</i>  | 2.08e-05 |
| 202858_at   | 7307   | <i>U2AF1</i>     | 2.11e-05 |
| 223705_s_at | 65056  | <i>GPBP1</i>     | 2.11e-05 |
| 54632_at    | 63892  | <i>THADA</i>     | 2.23e-05 |
| 227767_at   | 1456   | <i>CSNK1G3</i>   | 2.27e-05 |
| 212542_s_at | 55023  | <i>PHIP</i>      | 2.30e-05 |
| 227740_at   | 127933 | <i>UHMK1</i>     | 2.32e-05 |
| 200090_at   | 2339   | <i>FNTA</i>      | 2.37e-05 |
| 218769_s_at | 57763  | <i>ANKRA2</i>    | 2.37e-05 |
| 219280_at   | 54014  | <i>BRWD1</i>     | 2.38e-05 |
| 224703_at   | 8816   | <i>DCAF5</i>     | 2.46e-05 |
| 226320_at   | 10189  | <i>ALYREF</i>    | 2.50e-05 |
| 213575_at   | 29896  | <i>TRA2A</i>     | 2.50e-05 |
| 242438_at   | 171023 | <i>ASXL1</i>     | 2.50e-05 |
| 208022_s_at | 8555   | <i>CDC14B</i>    | 2.55e-05 |
| 1558002_at  | 11171  | <i>STRAP</i>     | 2.57e-05 |
| 212629_s_at | 5586   | <i>PKN2</i>      | 2.60e-05 |
| 226091_s_at | 93621  | <i>MRFAP1</i>    | 2.62e-05 |
| 225138_at   | 54764  | <i>ZRANB1</i>    | 2.65e-05 |
| 230164_at   | 285268 | <i>ZNF621</i>    | 2.66e-05 |
| 228768_at   | 96459  | <i>FNIP1</i>     | 2.70e-05 |
| 218751_s_at | 55294  | <i>FBXW7</i>     | 2.73e-05 |
| 201730_s_at | 7175   | <i>TPR</i>       | 2.77e-05 |
| 244801_at   | 5695   | <i>PSMB7</i>     | 2.82e-05 |
| 226148_at   | 29068  | <i>ZBTB44</i>    | 2.82e-05 |
| 225658_at   | 339745 | <i>SPOPL</i>     | 2.82e-05 |
| 221985_at   | 54800  | <i>KLHL24</i>    | 2.83e-05 |
| 212833_at   | 91137  | <i>SLC25A46</i>  | 2.86e-05 |
| 209485_s_at | 114876 | <i>OSBPL1A</i>   | 2.87e-05 |
| 235132_at   | 254128 | <i>LOC254128</i> | 2.91e-05 |
| 218288_s_at | 60492  | <i>CCDC90B</i>   | 2.92e-05 |
| 224227_s_at | 55814  | <i>BDP1</i>      | 2.93e-05 |
| 211989_at   | 6605   | <i>SMARCE1</i>   | 2.96e-05 |
| 226720_at   | 114825 | <i>PWWP2A</i>    | 2.97e-05 |

|              |           |                     |          |
|--------------|-----------|---------------------|----------|
| 231149_s_at  | 54986     | <i>ULK4</i>         | 2.99e-05 |
| 218324_s_at  | 65244     | <i>SPATS2</i>       | 3.01e-05 |
| 201498_at    | 7874      | <i>USP7</i>         | 3.04e-05 |
| 222745_s_at  | 79768     | <i>C15orf29</i>     | 3.05e-05 |
| 224309_s_at  | 10910     | <i>SUGT1</i>        | 3.08e-05 |
| 204771_s_at  | 7270      | <i>TTF1</i>         | 3.09e-05 |
| 209157_at    | 10294     | <i>DNAJA2</i>       | 3.10e-05 |
| 202460_s_at  | 9663      | <i>LPIN2</i>        | 3.11e-05 |
| 214850_at    | 100170939 | <i>LOC100170939</i> | 3.12e-05 |
| 217836_s_at  | 55249     | <i>YYIAP1</i>       | 3.14e-05 |
| 219221_at    | 253461    | <i>ZBTB38</i>       | 3.14e-05 |
| 203097_s_at  | 9693      | <i>RAPGEF2</i>      | 3.17e-05 |
| 221007_s_at  | 81608     | <i>FIP1L1</i>       | 3.17e-05 |
| 219024_at    | 59338     | <i>PLEKHA1</i>      | 3.18e-05 |
| 228050_at    | 84135     | <i>UTP15</i>        | 3.20e-05 |
| 212076_at    | 4297      | <i>MLL</i>          | 3.21e-05 |
| 229765_at    | 7756      | <i>ZNF207</i>       | 3.22e-05 |
| 205788_s_at  | 9877      | <i>ZC3H11A</i>      | 3.22e-05 |
| 219100_at    | 79991     | <i>OBFC1</i>        | 3.23e-05 |
| 217941_s_at  | 55914     | <i>ERBB2IP</i>      | 3.24e-05 |
| 225493_at    | 904       | <i>CCNT1</i>        | 3.29e-05 |
| 213080_x_at  | 6125      | <i>RPL5</i>         | 3.29e-05 |
| 209340_at    | 6675      | <i>UAP1</i>         | 3.31e-05 |
| 202318_s_at  | 26054     | <i>SENP6</i>        | 3.33e-05 |
| 233936_s_at  | 79893     | <i>GGNBP2</i>       | 3.33e-05 |
| 228775_at    | 55831     | <i>EMC3</i>         | 3.35e-05 |
| 218042_at    | 51138     | <i>COPS4</i>        | 3.38e-05 |
| 212603_at    | 10240     | <i>MRPS31</i>       | 3.42e-05 |
| 1555058_a_at | 9926      | <i>LPGAT1</i>       | 3.45e-05 |
| 205188_s_at  | 4090      | <i>SMAD5</i>        | 3.47e-05 |
| 1558173_a_at | 7798      | <i>LUZP1</i>        | 3.49e-05 |
| 208994_s_at  | 9360      | <i>PPIG</i>         | 3.49e-05 |
| 218905_at    | 55656     | <i>INTS8</i>        | 3.49e-05 |
| 222351_at    | 5519      | <i>PPP2R1B</i>      | 3.51e-05 |
| 207186_s_at  | 2186      | <i>BPTF</i>         | 3.56e-05 |
| 239635_at    | 10432     | <i>RBM14</i>        | 3.56e-05 |
| 221548_s_at  | 80895     | <i>ILKAP</i>        | 3.56e-05 |
| 212648_at    | 54505     | <i>DHX29</i>        | 3.58e-05 |
| 225041_at    | 54737     | <i>MPHOSPH8</i>     | 3.59e-05 |
| 208673_s_at  | 6428      | <i>SRSF3</i>        | 3.62e-05 |



|             |           |                     |          |
|-------------|-----------|---------------------|----------|
| 238706_at   | 167153    | <i>PAPD4</i>        | 3.64e-05 |
| 229399_at   | 55088     | <i>C10orf118</i>    | 3.69e-05 |
| 202301_s_at | 65117     | <i>RSRC2</i>        | 3.74e-05 |
| 202124_s_at | 66008     | <i>TRAK2</i>        | 3.77e-05 |
| 218356_at   | 29960     | <i>FTSJ2</i>        | 3.79e-05 |
| 210110_x_at | 3189      | <i>HNRNPH3</i>      | 3.82e-05 |
| 226104_at   | 81790     | <i>RNF170</i>       | 3.84e-05 |
| 223190_s_at | 55904     | <i>MLL5</i>         | 3.90e-05 |
| 203938_s_at | 9013      | <i>TAF1C</i>        | 3.91e-05 |
| 225887_at   | 80209     | <i>PROSER1</i>      | 3.91e-05 |
| 203791_at   | 1657      | <i>DMXL1</i>        | 3.93e-05 |
| 209240_at   | 8473      | <i>OGT</i>          | 3.96e-05 |
| 219074_at   | 55751     | <i>TMEM184C</i>     | 4.02e-05 |
| 219441_s_at | 79705     | <i>LRRK1</i>        | 4.02e-05 |
| 226783_at   | 85007     | <i>AGXT2L2</i>      | 4.12e-05 |
| 223067_at   | 51503     | <i>CWC15</i>        | 4.15e-05 |
| 218016_s_at | 55718     | <i>POLR3E</i>       | 4.15e-05 |
| 225551_at   | 163882    | <i>CNST</i>         | 4.18e-05 |
| 226784_at   | 221830    | <i>TWISTNB</i>      | 4.18e-05 |
| 210686_x_at | 8034      | <i>SLC25A16</i>     | 4.19e-05 |
| 201267_s_at | 5702      | <i>PSMC3</i>        | 4.30e-05 |
| 202633_at   | 11073     | <i>TOPBP1</i>       | 4.31e-05 |
| 224828_at   | 80315     | <i>CPEB4</i>        | 4.33e-05 |
| 241620_at   | 23347     | <i>SMCHD1</i>       | 4.34e-05 |
| 210281_s_at | 7750      | <i>ZMYM2</i>        | 4.35e-05 |
| 231853_at   | 51174     | <i>TUBD1</i>        | 4.40e-05 |
| 238602_at   | 129563    | <i>DIS3L2</i>       | 4.45e-05 |
| 208670_s_at | 23741     | <i>EID1</i>         | 4.48e-05 |
| 214220_s_at | 7840      | <i>ALMS1</i>        | 4.52e-05 |
| 232175_at   | 375       | <i>ARF1</i>         | 4.53e-05 |
| 217908_s_at | 55827     | <i>DCAF6</i>        | 4.55e-05 |
| 240168_at   | 23039     | <i>XPO7</i>         | 4.65e-05 |
| 215427_s_at | 23174     | <i>ZCCHC14</i>      | 4.65e-05 |
| 205981_s_at | 3622      | <i>ING2</i>         | 4.69e-05 |
| 225183_at   | 29035     | <i>C16orf72</i>     | 4.73e-05 |
| 226561_at   | 3267      | <i>AGFG1</i>        | 4.76e-05 |
| 1558527_at  | 100132707 | <i>LOC100132707</i> | 4.77e-05 |
| 202882_x_at | 51406     | <i>NOL7</i>         | 4.83e-05 |
| 221829_s_at | 3842      | <i>TNPO1</i>        | 4.84e-05 |
| 230609_at   | 9685      | <i>CLINT1</i>       | 4.89e-05 |

|             |        |                 |          |
|-------------|--------|-----------------|----------|
| 201253_s_at | 10423  | <i>CDIPT</i>    | 4.91e-05 |
| 225633_at   | 147991 | <i>DPY19L3</i>  | 4.91e-05 |
| 203366_at   | 5428   | <i>POLG</i>     | 4.92e-05 |
| 223576_at   | 51250  | <i>C6orf203</i> | 4.93e-05 |
| 227187_at   | 79872  | <i>CBLL1</i>    | 4.99e-05 |
| 214016_s_at | 6421   | <i>SFPQ</i>     | 5.03e-05 |
| 1553955_at  | 129285 | <i>PPP1R21</i>  | 5.04e-05 |
| 229878_at   | 85459  | <i>KIAA1731</i> | 5.06e-05 |
| 225229_at   | 27125  | <i>AFF4</i>     | 5.09e-05 |
| 214743_at   | 1523   | <i>CUX1</i>     | 5.13e-05 |
| 223356_s_at | 219402 | <i>MTIF3</i>    | 5.15e-05 |
| 203338_at   | 5529   | <i>PPP2R5E</i>  | 5.23e-05 |
| 223051_at   | 29101  | <i>SSU72</i>    | 5.23e-05 |
| 209022_at   | 10735  | <i>STAG2</i>    | 5.27e-05 |
| 200941_at   | 3281   | <i>HSBP1</i>    | 5.28e-05 |
| 217286_s_at | 57446  | <i>NDRG3</i>    | 5.28e-05 |
| 201879_at   | 25820  | <i>ARIH1</i>    | 5.29e-05 |
| 224365_s_at | 91151  | <i>TIGD7</i>    | 5.30e-05 |
| 218244_at   | 55035  | <i>NOL8</i>     | 5.31e-05 |
| 219583_s_at | 55812  | <i>SPATA7</i>   | 5.34e-05 |
| 227798_at   | 4086   | <i>SMAD1</i>    | 5.35e-05 |
| 242837_at   | 6429   | <i>SRSF4</i>    | 5.36e-05 |
| 201956_s_at | 8443   | <i>GNPAT</i>    | 5.36e-05 |
| 228318_s_at | 285464 | <i>CRIPAK</i>   | 5.36e-05 |
| 230528_s_at | 65996  | <i>MGC2752</i>  | 5.53e-05 |
| 227215_at   | 57120  | <i>GOPC</i>     | 5.55e-05 |
| 218401_s_at | 23528  | <i>ZNF281</i>   | 5.56e-05 |
| 241425_at   | 9818   | <i>NUPL1</i>    | 5.60e-05 |
| 218197_s_at | 55074  | <i>OXR1</i>     | 5.60e-05 |
| 228446_at   | 158358 | <i>KIAA2026</i> | 5.61e-05 |
| 209620_s_at | 22     | <i>ABCB7</i>    | 5.62e-05 |
| 203479_s_at | 54726  | <i>OTUD4</i>    | 5.63e-05 |
| 223011_s_at | 54940  | <i>OCIAD1</i>   | 5.66e-05 |
| 204157_s_at | 23387  | <i>SIK3</i>     | 5.74e-05 |
| 214464_at   | 8476   | <i>CDC42BPA</i> | 5.77e-05 |
| 224726_at   | 57534  | <i>MIB1</i>     | 5.81e-05 |
| 213034_at   | 23387  | <i>SIK3</i>     | 5.93e-05 |
| 227375_at   | 81573  | <i>ANKRD13C</i> | 6.00e-05 |
| 235461_at   | 54790  | <i>TET2</i>     | 6.02e-05 |
| 217978_s_at | 55585  | <i>UBE2Q1</i>   | 6.03e-05 |

|              |        |                  |          |
|--------------|--------|------------------|----------|
| 1552790_a_at | 7095   | <i>SEC62</i>     | 6.15e-05 |
| 211987_at    | 7155   | <i>TOP2B</i>     | 6.19e-05 |
| 209658_at    | 8881   | <i>CDC16</i>     | 6.21e-05 |
| 202600_s_at  | 8204   | <i>NRIP1</i>     | 6.26e-05 |
| 210426_x_at  | 6095   | <i>RORA</i>      | 6.27e-05 |
| 229514_at    | 55668  | <i>C14orf118</i> | 6.32e-05 |
| 223117_s_at  | 55031  | <i>USP47</i>     | 6.33e-05 |
| 217828_at    | 79811  | <i>SLTM</i>      | 6.35e-05 |
| 202373_s_at  | 25782  | <i>RAB3GAP2</i>  | 6.36e-05 |
| 225761_at    | 167153 | <i>PAPD4</i>     | 6.38e-05 |
| 240383_at    | 7323   | <i>UBE2D3</i>    | 6.49e-05 |
| 216682_s_at  | 55578  | <i>FAM48A</i>    | 6.53e-05 |
| 206240_s_at  | 7695   | <i>ZNF136</i>    | 6.58e-05 |
| 201440_at    | 9416   | <i>DDX23</i>     | 6.59e-05 |
| 242261_at    | 3658   | <i>IREB2</i>     | 6.60e-05 |
| 226969_at    | 4548   | <i>MTR</i>       | 6.64e-05 |
| 218452_at    | 50485  | <i>SMARCAL1</i>  | 6.65e-05 |
| 209425_at    | 23600  | <i>AMACR</i>     | 6.68e-05 |
| 1562836_at   | 1656   | <i>DDX6</i>      | 6.78e-05 |
| 33148_at     | 51663  | <i>ZFR</i>       | 6.79e-05 |
| 206652_at    | 9205   | <i>ZMYM5</i>     | 6.82e-05 |
| 208815_x_at  | 3308   | <i>HSPA4</i>     | 6.83e-05 |
| 201637_s_at  | 8087   | <i>FXR1</i>      | 6.84e-05 |
| 209418_s_at  | 8563   | <i>THOC5</i>     | 6.94e-05 |
| 202033_s_at  | 9821   | <i>RB1CC1</i>    | 6.94e-05 |
| 227072_at    | 25914  | <i>RTTN</i>      | 7.04e-05 |
| 223192_at    | 81894  | <i>SLC25A28</i>  | 7.04e-05 |
| 226917_s_at  | 29945  | <i>ANAPC4</i>    | 7.07e-05 |
| 223136_at    | 51390  | <i>AIG1</i>      | 7.10e-05 |
| 210218_s_at  | 6672   | <i>SP100</i>     | 7.11e-05 |
| 223096_at    | 51602  | <i>NOP58</i>     | 7.11e-05 |
| 221705_s_at  | 80143  | <i>SIKE1</i>     | 7.11e-05 |
| 225965_at    | 80821  | <i>DDHD1</i>     | 7.12e-05 |
| 225507_at    | 25957  | <i>PNISR</i>     | 7.18e-05 |
| 235791_x_at  | 1105   | <i>CHD1</i>      | 7.21e-05 |
| 228266_s_at  | 50810  | <i>HDGFRP3</i>   | 7.24e-05 |
| 209715_at    | 23468  | <i>CBX5</i>      | 7.27e-05 |
| 236862_at    | 57120  | <i>GOPC</i>      | 7.27e-05 |
| 242408_at    | 6815   | <i>STYX</i>      | 7.31e-05 |
| 202252_at    | 5872   | <i>RAB13</i>     | 7.36e-05 |

|             |        |                  |          |
|-------------|--------|------------------|----------|
| 1552310_at  | 123207 | <i>C15orf40</i>  | 7.37e-05 |
| 238295_at   | 79736  | <i>TEFM</i>      | 7.38e-05 |
| 226453_at   | 84153  | <i>RNASEH2C</i>  | 7.46e-05 |
| 218269_at   | 29102  | <i>DROSHA</i>    | 7.56e-05 |
| 219460_s_at | 55654  | <i>TMEM127</i>   | 7.61e-05 |
| 227896_at   | 56647  | <i>BCCIP</i>     | 7.63e-05 |
| 200593_s_at | 3192   | <i>HNRNPU</i>    | 7.66e-05 |
| 218334_at   | 80145  | <i>THOC7</i>     | 7.70e-05 |
| 216199_s_at | 4216   | <i>MAP3K4</i>    | 7.74e-05 |
| 205967_at   | 8364   | <i>HIST1H4C</i>  | 7.74e-05 |
| 1555920_at  | 11335  | <i>CBX3</i>      | 7.80e-05 |
| 1565823_at  | 989    | <i>SEPT7</i>     | 7.81e-05 |
| 217759_at   | 54765  | <i>TRIM44</i>    | 7.81e-05 |
| 228046_at   | 152485 | <i>ZNF827</i>    | 7.81e-05 |
| 232386_at   | 54832  | <i>VPS13C</i>    | 7.83e-05 |
| 222628_s_at | 51455  | <i>REVI</i>      | 7.86e-05 |
| 200893_at   | 6434   | <i>TRA2B</i>     | 7.93e-05 |
| 228992_at   | 80306  | <i>MED28</i>     | 7.96e-05 |
| 216221_s_at | 23369  | <i>PUM2</i>      | 8.00e-05 |
| 225194_at   | 5356   | <i>PLRG1</i>     | 8.05e-05 |
| 212885_at   | 10199  | <i>MPHOSPH10</i> | 8.06e-05 |
| 211993_at   | 65125  | <i>WNK1</i>      | 8.06e-05 |
| 205210_at   | 9392   | <i>TGFBRAP1</i>  | 8.09e-05 |
| 213398_s_at | 56948  | <i>SDR39U1</i>   | 8.15e-05 |
| 208887_at   | 8666   | <i>EIF3G</i>     | 8.17e-05 |
| 222691_at   | 51000  | <i>SLC35B3</i>   | 8.20e-05 |
| 240449_at   | 84905  | <i>ZNF341</i>    | 8.26e-05 |
| 218004_at   | 55108  | <i>BSDC1</i>     | 8.30e-05 |
| 226385_s_at | 115416 | <i>MALSU1</i>    | 8.34e-05 |
| 209896_s_at | 5781   | <i>PTPN11</i>    | 8.36e-05 |
| 37433_at    | 9063   | <i>PIAS2</i>     | 8.37e-05 |
| 228763_at   | 145553 | <i>MDP1</i>      | 8.38e-05 |
| 203353_s_at | 4152   | <i>MBD1</i>      | 8.43e-05 |
| 201687_s_at | 8539   | <i>API5</i>      | 8.43e-05 |
| 204786_s_at | 3455   | <i>IFNAR2</i>    | 8.49e-05 |
| 206583_at   | 55634  | <i>ZNF673</i>    | 8.51e-05 |
| 203957_at   | 1876   | <i>E2F6</i>      | 8.54e-05 |
| 209838_at   | 9318   | <i>COPS2</i>     | 8.57e-05 |
| 227990_at   | 10569  | <i>SLU7</i>      | 8.62e-05 |
| 203039_s_at | 4719   | <i>NDUFS1</i>    | 8.65e-05 |

|              |           |                  |          |
|--------------|-----------|------------------|----------|
| 37577_at     | 84986     | <i>ARHGAP19</i>  | 8.67e-05 |
| 1553103_at   | 4799      | <i>NFX1</i>      | 8.74e-05 |
| 203200_s_at  | 4552      | <i>MTRR</i>      | 8.82e-05 |
| 218100_s_at  | 55081     | <i>IFT57</i>     | 8.85e-05 |
| 204093_at    | 902       | <i>CCNH</i>      | 8.94e-05 |
| 212219_at    | 23198     | <i>PSME4</i>     | 9.03e-05 |
| 1557965_at   | 130916    | <i>MTERFD2</i>   | 9.03e-05 |
| 222912_at    | 408       | <i>ARRB1</i>     | 9.06e-05 |
| 201699_at    | 5706      | <i>PSMC6</i>     | 9.06e-05 |
| 228250_at    | 96459     | <i>FNIP1</i>     | 9.06e-05 |
| 201027_s_at  | 9669      | <i>EIF5B</i>     | 9.11e-05 |
| 226277_at    | 10087     | <i>COL4A3BP</i>  | 9.13e-05 |
| 222806_s_at  | 56946     | <i>C11orf30</i>  | 9.15e-05 |
| 214055_x_at  | 23215     | <i>PRRC2C</i>    | 9.22e-05 |
| 235180_at    | 6815      | <i>STYX</i>      | 9.42e-05 |
| 201513_at    | 7247      | <i>TSN</i>       | 9.42e-05 |
| 225825_at    | 25943     | <i>C20orf194</i> | 9.43e-05 |
| 213616_at    | 25941     | <i>TPGS2</i>     | 9.45e-05 |
| 226888_at    | 53944     | <i>CSNK1G1</i>   | 9.45e-05 |
| 213934_s_at  | 7571      | <i>ZNF23</i>     | 9.65e-05 |
| 224308_s_at  | 57508     | <i>INTS2</i>     | 9.70e-05 |
| 35436_at     | 2801      | <i>GOLGA2</i>    | 9.75e-05 |
| 225055_at    | 100499466 | <i>LINC00674</i> | 9.76e-05 |
| 218572_at    | 29082     | <i>CHMP4A</i>    | 9.82e-05 |
| 201384_s_at  | 4077      | <i>NBR1</i>      | 9.84e-05 |
| 222270_at    | 57223     | <i>SMEK2</i>     | 9.88e-05 |
| 222540_s_at  | 51773     | <i>RSF1</i>      | 9.94e-05 |
| 219237_s_at  | 79982     | <i>DNAJB14</i>   | 9.98e-05 |
| 201084_s_at  | 9774      | <i>BCLAF1</i>    | 1.01e-04 |
| 219636_s_at  | 80210     | <i>ARMC9</i>     | 1.01e-04 |
| 213578_at    | 657       | <i>BMPRIA</i>    | 1.02e-04 |
| 210282_at    | 7750      | <i>ZMYM2</i>     | 1.02e-04 |
| 213073_at    | 23503     | <i>ZFYVE26</i>   | 1.02e-04 |
| 208710_s_at  | 8943      | <i>AP3D1</i>     | 1.03e-04 |
| 1558953_s_at | 22897     | <i>CEP164</i>    | 1.03e-04 |
| 221532_s_at  | 80349     | <i>WDR61</i>     | 1.03e-04 |
| 202333_s_at  | 7320      | <i>UBE2B</i>     | 1.05e-04 |
| 212690_at    | 23259     | <i>DDHD2</i>     | 1.05e-04 |
| 214212_x_at  | 10979     | <i>FERMT2</i>    | 1.06e-04 |
| 208835_s_at  | 51747     | <i>LUC7L3</i>    | 1.06e-04 |

|              |        |                 |          |
|--------------|--------|-----------------|----------|
| 243759_at    | 57466  | <i>SCAF4</i>    | 1.06e-04 |
| 1554021_a_at | 7559   | <i>ZNF12</i>    | 1.07e-04 |
| 1555945_s_at | 23196  | <i>FAM120A</i>  | 1.07e-04 |
| 214766_s_at  | 25909  | <i>AHCTF1</i>   | 1.07e-04 |
| 224844_at    | 57606  | <i>SLAIN2</i>   | 1.07e-04 |
| 239648_at    | 123879 | <i>DCUNID3</i>  | 1.07e-04 |
| 228264_at    | 84680  | <i>ACCS</i>     | 1.08e-04 |
| 235653_s_at  | 152815 | <i>THAP6</i>    | 1.08e-04 |
| 1559044_at   | 51013  | <i>EXOSC1</i>   | 1.09e-04 |
| 204863_s_at  | 3572   | <i>IL6ST</i>    | 1.10e-04 |
| 230058_at    | 10807  | <i>SDCCAG3</i>  | 1.12e-04 |
| 219384_s_at  | 23536  | <i>ADAT1</i>    | 1.12e-04 |
| 224318_s_at  | 55683  | <i>KANSL3</i>   | 1.12e-04 |
| 225264_at    | 57038  | <i>RARS2</i>    | 1.12e-04 |
| 223138_s_at  | 170506 | <i>DHX36</i>    | 1.12e-04 |
| 214150_x_at  | 8992   | <i>ATP6V0E1</i> | 1.13e-04 |
| 232515_at    | 51130  | <i>ASB3</i>     | 1.13e-04 |
| 1557966_x_at | 130916 | <i>MTERFD2</i>  | 1.13e-04 |
| 1554447_at   | 554203 | <i>JPX</i>      | 1.14e-04 |
| 202640_s_at  | 8498   | <i>RANBP3</i>   | 1.16e-04 |
| 239742_at    | 56995  | <i>TULP4</i>    | 1.17e-04 |
| 222850_s_at  | 79982  | <i>DNAJB14</i>  | 1.17e-04 |
| 226999_at    | 55599  | <i>RNPC3</i>    | 1.18e-04 |
| 202568_s_at  | 4140   | <i>MARK3</i>    | 1.19e-04 |
| 226981_at    | 4297   | <i>MLL</i>      | 1.19e-04 |
| 221718_s_at  | 11214  | <i>AKAP13</i>   | 1.20e-04 |
| 219598_s_at  | 51389  | <i>RWDD1</i>    | 1.20e-04 |
| 219366_at    | 57099  | <i>AVEN</i>     | 1.20e-04 |
| 240452_at    | 2935   | <i>GSPT1</i>    | 1.21e-04 |
| 213593_s_at  | 29896  | <i>TRA2A</i>    | 1.21e-04 |
| 227670_at    | 7627   | <i>ZNF75A</i>   | 1.22e-04 |
| 200951_s_at  | 894    | <i>CCND2</i>    | 1.23e-04 |
| 209674_at    | 1407   | <i>CRY1</i>     | 1.24e-04 |
| 239392_s_at  | 57645  | <i>POGK</i>     | 1.24e-04 |
| 225968_at    | 166336 | <i>PRICKLE2</i> | 1.24e-04 |
| 222040_at    | 3178   | <i>HNRNPA1</i>  | 1.25e-04 |
| 212579_at    | 23347  | <i>SMCHD1</i>   | 1.25e-04 |
| 1552302_at   | 113277 | <i>TMEM106A</i> | 1.25e-04 |
| 243664_at    | 9352   | <i>TXNL1</i>    | 1.26e-04 |
| 203215_s_at  | 4646   | <i>MYO6</i>     | 1.27e-04 |

|              |           |                  |          |
|--------------|-----------|------------------|----------|
| 204710_s_at  | 26100     | <i>WIPI2</i>     | 1.28e-04 |
| 238807_at    | 100128961 | <i>GAPDHP62</i>  | 1.30e-04 |
| 225881_at    | 84912     | <i>SLC35B4</i>   | 1.31e-04 |
| 224771_at    | 89796     | <i>NAVI</i>      | 1.31e-04 |
| 223546_x_at  | 55692     | <i>LUC7L</i>     | 1.32e-04 |
| 213853_at    | 120526    | <i>DNAJC24</i>   | 1.32e-04 |
| 220768_s_at  | 1456      | <i>CSNK1G3</i>   | 1.34e-04 |
| 200968_s_at  | 5479      | <i>PIIB</i>      | 1.34e-04 |
| 213682_at    | 10762     | <i>NUP50</i>     | 1.34e-04 |
| 224973_at    | 55603     | <i>FAM46A</i>    | 1.34e-04 |
| 226441_at    | 10746     | <i>MAP3K2</i>    | 1.35e-04 |
| 1557553_at   | 4660      | <i>PPP1R12B</i>  | 1.36e-04 |
| 200667_at    | 7323      | <i>UBE2D3</i>    | 1.36e-04 |
| 222024_s_at  | 11214     | <i>AKAP13</i>    | 1.36e-04 |
| 203321_s_at  | 22850     | <i>ADNP2</i>     | 1.36e-04 |
| 1555495_a_at | 10283     | <i>CWC27</i>     | 1.37e-04 |
| 219155_at    | 26207     | <i>PITPNC1</i>   | 1.37e-04 |
| 225997_at    | 92597     | <i>MOB1B</i>     | 1.37e-04 |
| 211784_s_at  | 6426      | <i>SRSF1</i>     | 1.38e-04 |
| 210057_at    | 23049     | <i>SMG1</i>      | 1.38e-04 |
| 212108_at    | 23197     | <i>FAF2</i>      | 1.40e-04 |
| 203624_at    | 8227      | <i>AKAP17A</i>   | 1.41e-04 |
| 206055_s_at  | 6627      | <i>SNRPA1</i>    | 1.42e-04 |
| 238848_at    | 54726     | <i>OTUD4</i>     | 1.42e-04 |
| 226178_at    | 122809    | <i>SOCS4</i>     | 1.42e-04 |
| 223351_at    | 55028     | <i>C17orf80</i>  | 1.43e-04 |
| 225101_s_at  | 57231     | <i>SNX14</i>     | 1.43e-04 |
| 231403_at    | 7204      | <i>TRIO</i>      | 1.44e-04 |
| 210368_at    | 9708      | <i>PCDHGA8</i>   | 1.44e-04 |
| 223916_s_at  | 54880     | <i>BCOR</i>      | 1.44e-04 |
| 211711_s_at  | 5728      | <i>PTEN</i>      | 1.45e-04 |
| 230408_at    | 10336     | <i>PCGF3</i>     | 1.46e-04 |
| 203513_at    | 80208     | <i>SPG11</i>     | 1.46e-04 |
| 214280_x_at  | 3178      | <i>HNRNPA1</i>   | 1.47e-04 |
| 235041_at    | 9570      | <i>GOSR2</i>     | 1.47e-04 |
| 226284_at    | 57621     | <i>ZBTB2</i>     | 1.48e-04 |
| 225331_at    | 152137    | <i>CCDC50</i>    | 1.48e-04 |
| 230588_s_at  | 285074    | <i>LOC285074</i> | 1.48e-04 |
| 226604_at    | 160418    | <i>TMTC3</i>     | 1.49e-04 |
| 217829_s_at  | 10713     | <i>USP39</i>     | 1.50e-04 |

|              |           |                 |          |
|--------------|-----------|-----------------|----------|
| 224842_at    | 23049     | <i>SMG1</i>     | 1.50e-04 |
| 209943_at    | 26235     | <i>FBXL4</i>    | 1.50e-04 |
| 227444_at    | 100131755 | <i>ARMCX4</i>   | 1.50e-04 |
| 238534_at    | 9208      | <i>LRRFIP1</i>  | 1.51e-04 |
| 218348_s_at  | 29066     | <i>ZC3H7A</i>   | 1.51e-04 |
| 211921_x_at  | 5757      | <i>PTMA</i>     | 1.52e-04 |
| 239442_at    | 23177     | <i>CEP68</i>    | 1.52e-04 |
| 232323_s_at  | 55761     | <i>TTC17</i>    | 1.52e-04 |
| 225890_at    | 92667     | <i>C20orf72</i> | 1.53e-04 |
| 213110_s_at  | 1287      | <i>COL4A5</i>   | 1.54e-04 |
| 229043_at    | 64282     | <i>PAPD5</i>    | 1.54e-04 |
| 1553106_at   | 134553    | <i>C5orf24</i>  | 1.54e-04 |
| 200085_s_at  | 6923      | <i>TCEB2</i>    | 1.55e-04 |
| 213699_s_at  | 10971     | <i>YWHAQ</i>    | 1.55e-04 |
| 208726_s_at  | 8894      | <i>EIF2S2</i>   | 1.58e-04 |
| 221570_s_at  | 29081     | <i>METTL5</i>   | 1.58e-04 |
| 224696_s_at  | 8816      | <i>DCAF5</i>    | 1.59e-04 |
| 213956_at    | 9857      | <i>CEP350</i>   | 1.60e-04 |
| 227454_at    | 57551     | <i>TAOK1</i>    | 1.60e-04 |
| 201100_s_at  | 8239      | <i>USP9X</i>    | 1.61e-04 |
| 200596_s_at  | 8661      | <i>EIF3A</i>    | 1.61e-04 |
| 224974_at    | 64426     | <i>SUDS3</i>    | 1.61e-04 |
| 200959_at    | 2521      | <i>FUS</i>      | 1.63e-04 |
| 218946_at    | 27247     | <i>NFUI</i>     | 1.64e-04 |
| 1569594_a_at | 9147      | <i>NEMF</i>     | 1.66e-04 |
| 222209_s_at  | 65084     | <i>TMEM135</i>  | 1.66e-04 |
| 214723_x_at  | 375248    | <i>ANKRD36</i>  | 1.66e-04 |
| 1554415_at   | 27097     | <i>TAF5L</i>    | 1.67e-04 |
| 218859_s_at  | 51575     | <i>ESF1</i>     | 1.67e-04 |
| 229563_s_at  | 4736      | <i>RPL10A</i>   | 1.68e-04 |
| 213984_at    | 23244     | <i>PDS5A</i>    | 1.68e-04 |
| 1552482_at   | 65059     | <i>RAPH1</i>    | 1.68e-04 |
| 201917_s_at  | 55186     | <i>SLC25A36</i> | 1.69e-04 |
| 205415_s_at  | 4287      | <i>ATXN3</i>    | 1.70e-04 |
| 200967_at    | 5479      | <i>PIIB</i>     | 1.70e-04 |
| 202386_s_at  | 9665      | <i>KIAA0430</i> | 1.70e-04 |
| 202602_s_at  | 27336     | <i>HTATSF1</i>  | 1.71e-04 |
| 243874_at    | 4026      | <i>LPP</i>      | 1.72e-04 |
| 217834_s_at  | 10492     | <i>SYNCRIP</i>  | 1.72e-04 |
| 218801_at    | 55757     | <i>UGGT2</i>    | 1.72e-04 |



|             |           |                     |          |
|-------------|-----------|---------------------|----------|
| 229422_at   | 4898      | <i>NRD1</i>         | 1.73e-04 |
| 210701_at   | 10428     | <i>CFDP1</i>        | 1.75e-04 |
| 208672_s_at | 6428      | <i>SRSF3</i>        | 1.76e-04 |
| 228373_at   | 29035     | <i>C16orf72</i>     | 1.76e-04 |
| 213327_s_at | 219333    | <i>USP12</i>        | 1.76e-04 |
| 209797_at   | 10330     | <i>CNPY2</i>        | 1.77e-04 |
| 226076_s_at | 114785    | <i>MBD6</i>         | 1.77e-04 |
| 236831_at   | 152137    | <i>CCDC50</i>       | 1.77e-04 |
| 235451_at   | 4090      | <i>SMAD5</i>        | 1.78e-04 |
| 244597_at   | 26010     | <i>SPATS2L</i>      | 1.78e-04 |
| 208158_s_at | 114876    | <i>OSBPL1A</i>      | 1.78e-04 |
| 205603_s_at | 1730      | <i>DIAPH2</i>       | 1.79e-04 |
| 202334_s_at | 7320      | <i>UBE2B</i>        | 1.79e-04 |
| 217722_s_at | 51335     | <i>NGRN</i>         | 1.79e-04 |
| 235436_at   | 64794     | <i>DDX31</i>        | 1.79e-04 |
| 226087_at   | 84328     | <i>LZIC</i>         | 1.79e-04 |
| 223606_x_at | 55425     | <i>KIAA1704</i>     | 1.80e-04 |
| 236155_at   | 79670     | <i>ZCCHC6</i>       | 1.81e-04 |
| 221475_s_at | 6138      | <i>RPL15</i>        | 1.82e-04 |
| 206138_s_at | 5298      | <i>PI4KB</i>        | 1.83e-04 |
| 205335_s_at | 6728      | <i>SRP19</i>        | 1.83e-04 |
| 225595_at   | 58487     | <i>CREBZF</i>       | 1.83e-04 |
| 201129_at   | 6432      | <i>SRSF7</i>        | 1.84e-04 |
| 221536_s_at | 55341     | <i>LSG1</i>         | 1.84e-04 |
| 227601_at   | 57721     | <i>METTL14</i>      | 1.84e-04 |
| 204053_x_at | 5728      | <i>PTEN</i>         | 1.85e-04 |
| 219123_at   | 7775      | <i>ZNF232</i>       | 1.85e-04 |
| 228793_at   | 221037    | <i>JMJD1C</i>       | 1.85e-04 |
| 226319_s_at | 10189     | <i>ALYREF</i>       | 1.87e-04 |
| 232064_at   | 2241      | <i>FER</i>          | 1.88e-04 |
| 241376_at   | 100130097 | <i>LOC100130097</i> | 1.88e-04 |
| 225640_at   | 100506710 | <i>LOC100506710</i> | 1.88e-04 |
| 203269_at   | 8439      | <i>NSMAF</i>        | 1.89e-04 |
| 1558747_at  | 23347     | <i>SMCHD1</i>       | 1.89e-04 |
| 213671_s_at | 4141      | <i>MARS</i>         | 1.90e-04 |
| 221621_at   | 654434    | <i>LINC00338</i>    | 1.90e-04 |
| 224922_at   | 1459      | <i>CSNK2A2</i>      | 1.91e-04 |
| 203640_at   | 10150     | <i>MBNL2</i>        | 1.91e-04 |
| 222544_s_at | 54904     | <i>WHSC1L1</i>      | 1.91e-04 |
| 203522_at   | 9973      | <i>CCS</i>          | 1.92e-04 |

|              |        |                  |          |
|--------------|--------|------------------|----------|
| 225925_s_at  | 84196  | <i>USP48</i>     | 1.92e-04 |
| 32099_at     | 9667   | <i>SAFB2</i>     | 1.93e-04 |
| 213998_s_at  | 10521  | <i>DDX17</i>     | 1.93e-04 |
| 225490_at    | 196528 | <i>ARID2</i>     | 1.93e-04 |
| 205370_x_at  | 1629   | <i>DBT</i>       | 1.94e-04 |
| 238635_at    | 64417  | <i>C5orf28</i>   | 1.94e-04 |
| 222593_s_at  | 65244  | <i>SPATS2</i>    | 1.94e-04 |
| 232660_at    | 572    | <i>BAD</i>       | 1.95e-04 |
| 239163_at    | 7320   | <i>UBE2B</i>     | 1.96e-04 |
| 213483_at    | 23398  | <i>PPWD1</i>     | 1.96e-04 |
| 230148_at    | 130872 | <i>AHSA2</i>     | 1.96e-04 |
| 239336_at    | 7057   | <i>THBS1</i>     | 1.97e-04 |
| 230885_at    | 6687   | <i>SPG7</i>      | 1.98e-04 |
| 1559946_s_at | 10856  | <i>RUVBL2</i>    | 1.98e-04 |
| 208549_x_at  | 5757   | <i>PTMA</i>      | 1.99e-04 |
| 236254_at    | 157680 | <i>VPS13B</i>    | 1.99e-04 |
| 209798_at    | 4863   | <i>NPAT</i>      | 2.00e-04 |
| 226035_at    | 57478  | <i>USP31</i>     | 2.00e-04 |
| 213581_at    | 5134   | <i>PDCD2</i>     | 2.01e-04 |
| 202682_s_at  | 7375   | <i>USP4</i>      | 2.02e-04 |
| 215281_x_at  | 23126  | <i>POGZ</i>      | 2.02e-04 |
| 218263_s_at  | 58486  | <i>ZBED5</i>     | 2.02e-04 |
| 233564_s_at  | 81602  | <i>CDADC1</i>    | 2.02e-04 |
| 213596_at    | 837    | <i>CASP4</i>     | 2.03e-04 |
| 203459_s_at  | 64601  | <i>VPS16</i>     | 2.03e-04 |
| 225863_s_at  | 83636  | <i>C19orf12</i>  | 2.05e-04 |
| 221935_s_at  | 285203 | <i>EOGT</i>      | 2.05e-04 |
| 209534_x_at  | 11214  | <i>AKAP13</i>    | 2.07e-04 |
| 213243_at    | 157680 | <i>VPS13B</i>    | 2.07e-04 |
| 228582_x_at  | 378938 | <i>MALAT1</i>    | 2.07e-04 |
| 218710_at    | 55622  | <i>TTC27</i>     | 2.08e-04 |
| 225384_at    | 85440  | <i>DOCK7</i>     | 2.09e-04 |
| 219266_at    | 59348  | <i>ZNF350</i>    | 2.10e-04 |
| 44111_at     | 26276  | <i>VPS33B</i>    | 2.11e-04 |
| 218538_s_at  | 57380  | <i>MRS2</i>      | 2.11e-04 |
| 242539_at    | 129563 | <i>DIS3L2</i>    | 2.12e-04 |
| 230893_at    | 134218 | <i>DNAJC21</i>   | 2.13e-04 |
| 209702_at    | 79068  | <i>FTO</i>       | 2.16e-04 |
| 212643_at    | 93487  | <i>MAPK1IP1L</i> | 2.20e-04 |
| 1553186_x_at | 158158 | <i>RASEF</i>     | 2.20e-04 |

|             |           |                   |          |
|-------------|-----------|-------------------|----------|
| 232975_at   | 414777    | <i>HCG18</i>      | 2.21e-04 |
| 201053_s_at | 9491      | <i>PSMF1</i>      | 2.22e-04 |
| 201788_at   | 11325     | <i>DDX42</i>      | 2.22e-04 |
| 224827_at   | 92181     | <i>UBTD2</i>      | 2.22e-04 |
| 219571_s_at | 7559      | <i>ZNF12</i>      | 2.23e-04 |
| 203113_s_at | 1936      | <i>EEF1D</i>      | 2.24e-04 |
| 215338_s_at | 4820      | <i>NKTR</i>       | 2.27e-04 |
| 236649_at   | 56986     | <i>DTWD1</i>      | 2.28e-04 |
| 222616_s_at | 10600     | <i>USP16</i>      | 2.29e-04 |
| 221878_at   | 388969    | <i>C2orf68</i>    | 2.29e-04 |
| 222770_s_at | 60558     | <i>GUF1</i>       | 2.31e-04 |
| 234733_s_at | 57697     | <i>FANCM</i>      | 2.32e-04 |
| 201586_s_at | 6421      | <i>SFPQ</i>       | 2.33e-04 |
| 202601_s_at | 27336     | <i>HTATSF1</i>    | 2.33e-04 |
| 200840_at   | 3735      | <i>KARS</i>       | 2.34e-04 |
| 236368_at   | 23392     | <i>KIAA0368</i>   | 2.35e-04 |
| 227148_at   | 130271    | <i>PLEKHH2</i>    | 2.35e-04 |
| 228839_s_at | 642361    | <i>LOC642361</i>  | 2.35e-04 |
| 230618_s_at | 23215     | <i>PRRC2C</i>     | 2.37e-04 |
| 222999_s_at | 81669     | <i>CCNL2</i>      | 2.37e-04 |
| 210111_s_at | 23008     | <i>KLHDC10</i>    | 2.38e-04 |
| 212034_s_at | 23265     | <i>EXOC7</i>      | 2.38e-04 |
| 212232_at   | 23360     | <i>FNBP4</i>      | 2.39e-04 |
| 1554628_at  | 126295    | <i>ZNF57</i>      | 2.39e-04 |
| 227406_at   | 100129387 | <i>GABPB1-AS1</i> | 2.39e-04 |
| 217988_at   | 57820     | <i>CCNB1IP1</i>   | 2.40e-04 |
| 244435_at   | 642938    | <i>FAM196A</i>    | 2.40e-04 |
| 229153_at   | 84138     | <i>SLC7A6OS</i>   | 2.41e-04 |
| 1564093_at  | 4750      | <i>NEK1</i>       | 2.42e-04 |
| 201071_x_at | 23451     | <i>SF3B1</i>      | 2.42e-04 |
| 208943_s_at | 7095      | <i>SEC62</i>      | 2.43e-04 |
| 212709_at   | 23279     | <i>NUP160</i>     | 2.43e-04 |
| 202745_at   | 9101      | <i>USP8</i>       | 2.45e-04 |
| 203322_at   | 22850     | <i>ADNP2</i>      | 2.45e-04 |
| 235226_at   | 23097     | <i>CDK19</i>      | 2.46e-04 |
| 239014_at   | 55749     | <i>CCAR1</i>      | 2.46e-04 |
| 224781_s_at | 84991     | <i>RBM17</i>      | 2.46e-04 |
| 229509_at   | 256471    | <i>MFSD8</i>      | 2.46e-04 |
| 209609_s_at | 65005     | <i>MRPL9</i>      | 2.47e-04 |
| 219818_s_at | 55094     | <i>GPATCH1</i>    | 2.50e-04 |

|              |           |                  |          |
|--------------|-----------|------------------|----------|
| 223413_s_at  | 55646     | <i>LYAR</i>      | 2.50e-04 |
| 226419_s_at  | 645460    | <i>FLJ44342</i>  | 2.50e-04 |
| 209102_s_at  | 26959     | <i>HBP1</i>      | 2.51e-04 |
| 221257_x_at  | 81545     | <i>FBXO38</i>    | 2.51e-04 |
| 220525_s_at  | 550       | <i>AUP1</i>      | 2.52e-04 |
| 213941_x_at  | 6201      | <i>RPS7</i>      | 2.52e-04 |
| 225159_s_at  | 2005      | <i>ELK4</i>      | 2.54e-04 |
| 207855_s_at  | 23155     | <i>CLCC1</i>     | 2.54e-04 |
| 242429_at    | 163081    | <i>ZNF567</i>    | 2.55e-04 |
| 230808_at    | 2339      | <i>FNTA</i>      | 2.56e-04 |
| 223329_x_at  | 10910     | <i>SUGT1</i>     | 2.57e-04 |
| 224446_at    | 84298     | <i>LLPH</i>      | 2.59e-04 |
| 232301_at    | 89910     | <i>UBE3B</i>     | 2.60e-04 |
| 238841_at    | 138639    | <i>PTPDC1</i>    | 2.60e-04 |
| 214911_s_at  | 6046      | <i>BRD2</i>      | 2.61e-04 |
| 201099_at    | 8239      | <i>USP9X</i>     | 2.61e-04 |
| 208765_s_at  | 10236     | <i>HNRNPR</i>    | 2.61e-04 |
| 202268_s_at  | 8883      | <i>NAE1</i>      | 2.62e-04 |
| 200019_s_at  | 2197      | <i>FAU</i>       | 2.63e-04 |
| 203602_s_at  | 7709      | <i>ZBTB17</i>    | 2.64e-04 |
| 218577_at    | 55631     | <i>LRRC40</i>    | 2.64e-04 |
| 203079_s_at  | 8453      | <i>CUL2</i>      | 2.65e-04 |
| 203569_s_at  | 8481      | <i>OFD1</i>      | 2.65e-04 |
| 226045_at    | 10818     | <i>FRS2</i>      | 2.65e-04 |
| 204479_at    | 26578     | <i>OSTF1</i>     | 2.65e-04 |
| 227279_at    | 85012     | <i>TCEAL3</i>    | 2.65e-04 |
| 220925_at    | 60560     | <i>NAA35</i>     | 2.66e-04 |
| 223882_at    | 83989     | <i>FAM172A</i>   | 2.66e-04 |
| 40465_at     | 9416      | <i>DDX23</i>     | 2.67e-04 |
| 226763_at    | 91404     | <i>SESTD1</i>    | 2.71e-04 |
| 232524_x_at  | 29945     | <i>ANAPC4</i>    | 2.72e-04 |
| 1558041_a_at | 653319    | <i>KIAA0895L</i> | 2.72e-04 |
| 238412_at    | 100131998 | <i>RRN3P3</i>    | 2.73e-04 |
| 222794_x_at  | 55149     | <i>MTPAP</i>     | 2.74e-04 |
| 224567_x_at  | 378938    | <i>MALAT1</i>    | 2.74e-04 |
| 236700_at    | 8663      | <i>EIF3C</i>     | 2.75e-04 |
| 202093_s_at  | 54623     | <i>PAF1</i>      | 2.75e-04 |
| 227869_at    | 90736     | <i>FAM104B</i>   | 2.75e-04 |
| 201593_s_at  | 55854     | <i>ZC3H15</i>    | 2.77e-04 |
| 226006_at    | 100131801 | <i>PET100</i>    | 2.77e-04 |

|              |        |                 |          |
|--------------|--------|-----------------|----------|
| 214288_s_at  | 5689   | <i>PSMB1</i>    | 2.78e-04 |
| 1562848_at   | 9798   | <i>IST1</i>     | 2.79e-04 |
| 222792_s_at  | 29080  | <i>CCDC59</i>   | 2.79e-04 |
| 224648_at    | 65056  | <i>GPBP1</i>    | 2.79e-04 |
| 213735_s_at  | 1329   | <i>COX5B</i>    | 2.83e-04 |
| 208956_x_at  | 1854   | <i>DUT</i>      | 2.83e-04 |
| 224477_s_at  | 84309  | <i>NUDT16L1</i> | 2.83e-04 |
| 226608_at    | 388272 | <i>C16orf87</i> | 2.83e-04 |
| 212367_at    | 10116  | <i>FEM1B</i>    | 2.84e-04 |
| 211000_s_at  | 3572   | <i>IL6ST</i>    | 2.85e-04 |
| 213743_at    | 905    | <i>CCNT2</i>    | 2.86e-04 |
| 224634_at    | 54865  | <i>GPATCH4</i>  | 2.86e-04 |
| 232033_at    | 57695  | <i>USP37</i>    | 2.86e-04 |
| 1554473_at   | 57522  | <i>SRGAP1</i>   | 2.87e-04 |
| 1554178_a_at | 285172 | <i>FAM126B</i>  | 2.87e-04 |
| 231793_s_at  | 817    | <i>CAMK2D</i>   | 2.89e-04 |
| 221486_at    | 2029   | <i>ENSA</i>     | 2.89e-04 |
| 218682_s_at  | 22950  | <i>SLC4A1AP</i> | 2.89e-04 |
| 200098_s_at  | 51433  | <i>ANAPC5</i>   | 2.89e-04 |
| 218945_at    | 79091  | <i>METTL22</i>  | 2.89e-04 |
| 215606_s_at  | 23085  | <i>ERC1</i>     | 2.90e-04 |
| 204732_s_at  | 373    | <i>TRIM23</i>   | 2.91e-04 |
| 224906_at    | 196527 | <i>ANO6</i>     | 2.91e-04 |
| 209503_s_at  | 5705   | <i>PSMC5</i>    | 2.92e-04 |
| 240990_at    | 5868   | <i>RAB5A</i>    | 2.92e-04 |
| 216109_at    | 23389  | <i>MED13L</i>   | 2.92e-04 |
| 203291_at    | 4850   | <i>CNOT4</i>    | 2.93e-04 |
| 228822_s_at  | 10600  | <i>USP16</i>    | 2.93e-04 |
| 228578_at    | 129831 | <i>RBM45</i>    | 2.94e-04 |
| 208720_s_at  | 9584   | <i>RBM39</i>    | 2.95e-04 |
| 221495_s_at  | 22980  | <i>TCF25</i>    | 2.95e-04 |
| 222613_at    | 57102  | <i>C12orf4</i>  | 2.97e-04 |
| 225180_at    | 151613 | <i>TTC14</i>    | 2.99e-04 |
| 214274_s_at  | 30     | <i>ACAA1</i>    | 3.00e-04 |
| 201724_s_at  | 2589   | <i>GALNT1</i>   | 3.01e-04 |
| 202408_s_at  | 26121  | <i>PRPF31</i>   | 3.01e-04 |
| 227484_at    | 57522  | <i>SRGAP1</i>   | 3.01e-04 |
| 224614_at    | 1783   | <i>DYNC1LI2</i> | 3.02e-04 |
| 212642_s_at  | 3097   | <i>HIVEP2</i>   | 3.03e-04 |
| 244396_at    | 10146  | <i>G3BP1</i>    | 3.06e-04 |

|             |        |                  |          |
|-------------|--------|------------------|----------|
| 203346_s_at | 22823  | <i>MTF2</i>      | 3.07e-04 |
| 205583_s_at | 79868  | <i>ALG13</i>     | 3.07e-04 |
| 221506_s_at | 30000  | <i>TNPO2</i>     | 3.08e-04 |
| 200843_s_at | 2058   | <i>EPRS</i>      | 3.10e-04 |
| 203944_x_at | 11120  | <i>BTN2A1</i>    | 3.11e-04 |
| 202116_at   | 5977   | <i>DPF2</i>      | 3.13e-04 |
| 202220_at   | 22889  | <i>KIAA0907</i>  | 3.13e-04 |
| 225552_x_at | 54998  | <i>AURKAIP1</i>  | 3.13e-04 |
| 213077_at   | 64848  | <i>YTHDC2</i>    | 3.14e-04 |
| 222414_at   | 58508  | <i>MLL3</i>      | 3.15e-04 |
| 213588_x_at | 9045   | <i>RPL14</i>     | 3.16e-04 |
| 230151_at   | 57213  | <i>SPRYD7</i>    | 3.16e-04 |
| 232075_at   | 80349  | <i>WDR61</i>     | 3.17e-04 |
| 224903_at   | 84916  | <i>CIRH1A</i>    | 3.18e-04 |
| 225958_at   | 1911   | <i>PHC1</i>      | 3.20e-04 |
| 207614_s_at | 8454   | <i>CUL1</i>      | 3.20e-04 |
| 205329_s_at | 8723   | <i>SNX4</i>      | 3.20e-04 |
| 201391_at   | 10131  | <i>TRAP1</i>     | 3.20e-04 |
| 223086_x_at | 51258  | <i>MRPL51</i>    | 3.20e-04 |
| 238584_at   | 79781  | <i>IQCA1</i>     | 3.20e-04 |
| 235767_x_at | 51808  | <i>PHAX</i>      | 3.22e-04 |
| 219757_s_at | 54916  | <i>C14orf101</i> | 3.22e-04 |
| 222600_s_at | 55236  | <i>UBA6</i>      | 3.23e-04 |
| 214086_s_at | 10038  | <i>PARP2</i>     | 3.24e-04 |
| 228556_at   | 91746  | <i>YTHDC1</i>    | 3.24e-04 |
| 225409_at   | 493753 | <i>COA5</i>      | 3.24e-04 |
| 206592_s_at | 8943   | <i>AP3D1</i>     | 3.25e-04 |
| 212469_at   | 25836  | <i>NIPBL</i>     | 3.25e-04 |
| 227796_at   | 643836 | <i>ZFP62</i>     | 3.26e-04 |
| 242953_at   | 10780  | <i>ZNF234</i>    | 3.27e-04 |
| 222811_at   | 55783  | <i>FTSJD1</i>    | 3.27e-04 |
| 212852_s_at | 6738   | <i>TROVE2</i>    | 3.28e-04 |
| 202762_at   | 9475   | <i>ROCK2</i>     | 3.29e-04 |
| 212318_at   | 23534  | <i>TNPO3</i>     | 3.29e-04 |
| 212982_at   | 23390  | <i>ZDHHC17</i>   | 3.32e-04 |
| 212644_s_at | 93487  | <i>MAPK1IP1L</i> | 3.32e-04 |
| 240072_at   | 55252  | <i>ASXL2</i>     | 3.33e-04 |
| 202546_at   | 8673   | <i>VAMP8</i>     | 3.34e-04 |
| 221518_s_at | 55031  | <i>USP47</i>     | 3.34e-04 |
| 238220_at   | 7403   | <i>KDM6A</i>     | 3.35e-04 |

|              |        |                 |          |
|--------------|--------|-----------------|----------|
| 225100_at    | 200933 | <i>FBXO45</i>   | 3.35e-04 |
| 228686_at    | 644873 | <i>FLJ33630</i> | 3.35e-04 |
| 1555579_s_at | 5797   | <i>PTPRM</i>    | 3.36e-04 |
| 218139_s_at  | 55745  | <i>AP5M1</i>    | 3.36e-04 |
| 230185_at    | 79725  | <i>THAP9</i>    | 3.36e-04 |
| 208930_s_at  | 3609   | <i>ILF3</i>     | 3.38e-04 |
| 226510_at    | 25938  | <i>HEATR5A</i>  | 3.39e-04 |
| 220946_s_at  | 29072  | <i>SETD2</i>    | 3.40e-04 |
| 238418_at    | 84912  | <i>SLC35B4</i>  | 3.40e-04 |
| 212153_at    | 23126  | <i>POGZ</i>     | 3.41e-04 |
| 219212_at    | 51182  | <i>HSPA14</i>   | 3.41e-04 |
| 225265_at    | 5937   | <i>RBMS1</i>    | 3.45e-04 |
| 218438_s_at  | 80306  | <i>MED28</i>    | 3.45e-04 |
| 204297_at    | 5289   | <i>PIK3C3</i>   | 3.46e-04 |
| 202251_at    | 9129   | <i>PRPF3</i>    | 3.46e-04 |
| 201854_s_at  | 23300  | <i>ATMIN</i>    | 3.46e-04 |
| 217550_at    | 22926  | <i>ATF6</i>     | 3.47e-04 |
| 212189_s_at  | 25839  | <i>COG4</i>     | 3.47e-04 |
| 217987_at    | 54529  | <i>ASNSD1</i>   | 3.47e-04 |
| 212483_at    | 25836  | <i>NIPBL</i>    | 3.48e-04 |
| 224558_s_at  | 378938 | <i>MALAT1</i>   | 3.48e-04 |
| 1569503_at   | 54497  | <i>HEATR5B</i>  | 3.49e-04 |
| 205510_s_at  | 55056  | <i>FLJ10038</i> | 3.49e-04 |
| 212716_s_at  | 27335  | <i>EIF3K</i>    | 3.50e-04 |
| 223177_at    | 221294 | <i>NT5DC1</i>   | 3.51e-04 |
| 227208_at    | 338657 | <i>CCDC84</i>   | 3.51e-04 |
| 223815_at    | 90799  | <i>CEP95</i>    | 3.52e-04 |
| 200016_x_at  | 3178   | <i>HNRNPA1</i>  | 3.54e-04 |
| 202416_at    | 7266   | <i>DNAJC7</i>   | 3.54e-04 |
| 202651_at    | 9926   | <i>LPGAT1</i>   | 3.54e-04 |
| 223058_at    | 83641  | <i>FAM107B</i>  | 3.55e-04 |
| 226154_at    | 10059  | <i>DNMIL</i>    | 3.57e-04 |
| 228569_at    | 10914  | <i>PAPOLA</i>   | 3.58e-04 |
| 244786_at    | 283596 | <i>SNHG10</i>   | 3.58e-04 |
| 49485_at     | 11108  | <i>PRDM4</i>    | 3.59e-04 |
| 225528_at    | 10526  | <i>IPO8</i>     | 3.60e-04 |
| 227018_at    | 54878  | <i>DPP8</i>     | 3.61e-04 |
| 212266_s_at  | 6430   | <i>SRSF5</i>    | 3.62e-04 |
| 66053_at     | 221092 | <i>HNRNPUL2</i> | 3.62e-04 |
| 219644_at    | 51134  | <i>CCDC41</i>   | 3.66e-04 |

|              |        |                 |          |
|--------------|--------|-----------------|----------|
| 224366_s_at  | 85021  | <i>REPS1</i>    | 3.67e-04 |
| 212725_s_at  | 55000  | <i>TUG1</i>     | 3.69e-04 |
| 1555439_at   | 9330   | <i>GTF3C3</i>   | 3.70e-04 |
| 209814_at    | 27309  | <i>ZNF330</i>   | 3.70e-04 |
| 218108_at    | 55148  | <i>UBR7</i>     | 3.70e-04 |
| 231059_x_at  | 51282  | <i>SCAND1</i>   | 3.71e-04 |
| 219033_at    | 79668  | <i>PARP8</i>    | 3.72e-04 |
| 222021_x_at  | 255812 | <i>SDHAP1</i>   | 3.72e-04 |
| 226979_at    | 10746  | <i>MAP3K2</i>   | 3.74e-04 |
| 237502_at    | 54675  | <i>CRLS1</i>    | 3.74e-04 |
| 203830_at    | 64149  | <i>C17orf75</i> | 3.74e-04 |
| 223578_x_at  | 378938 | <i>MALAT1</i>   | 3.75e-04 |
| 213357_at    | 404672 | <i>GTF2H5</i>   | 3.77e-04 |
| 231714_s_at  | 10717  | <i>AP4B1</i>    | 3.78e-04 |
| 201575_at    | 22938  | <i>SNW1</i>     | 3.78e-04 |
| 202231_at    | 10480  | <i>EIF3M</i>    | 3.79e-04 |
| 230629_s_at  | 57634  | <i>EP400</i>    | 3.79e-04 |
| 201351_s_at  | 10730  | <i>YME1L1</i>   | 3.80e-04 |
| 218055_s_at  | 55255  | <i>WDR41</i>    | 3.80e-04 |
| 225893_at    | 149041 | <i>RC3H1</i>    | 3.80e-04 |
| 221213_s_at  | 54816  | <i>ZNF280D</i>  | 3.83e-04 |
| 211678_s_at  | 55905  | <i>RNF114</i>   | 3.84e-04 |
| 1568594_s_at | 84851  | <i>TRIM52</i>   | 3.85e-04 |
| 221229_s_at  | 55006  | <i>TRMT61B</i>  | 3.90e-04 |
| 233642_s_at  | 54497  | <i>HEATR5B</i>  | 3.91e-04 |
| 202097_at    | 9972   | <i>NUP153</i>   | 3.92e-04 |
| 227039_at    | 11214  | <i>AKAP13</i>   | 3.92e-04 |
| 212723_at    | 23210  | <i>JMJD6</i>    | 3.92e-04 |
| 227605_at    | 9255   | <i>AIMP1</i>    | 3.93e-04 |
| 239413_at    | 22995  | <i>CEP152</i>   | 3.94e-04 |
| 200915_x_at  | 3895   | <i>KTNI</i>     | 3.95e-04 |
| 212651_at    | 9886   | <i>RHOBTB1</i>  | 3.95e-04 |
| 201773_at    | 23394  | <i>ADNP</i>     | 3.95e-04 |
| 213627_at    | 10916  | <i>MAGED2</i>   | 3.96e-04 |
| 226290_at    | 55814  | <i>BDP1</i>     | 3.97e-04 |
| 210947_s_at  | 4437   | <i>MSH3</i>     | 4.01e-04 |
| 218351_at    | 54951  | <i>COMMD8</i>   | 4.01e-04 |
| 206854_s_at  | 6885   | <i>MAP3K7</i>   | 4.06e-04 |
| 241757_x_at  | 51626  | <i>DYNC2L1I</i> | 4.06e-04 |
| 226785_at    | 286410 | <i>ATP11C</i>   | 4.06e-04 |



|             |        |                 |          |
|-------------|--------|-----------------|----------|
| 210097_s_at | 51406  | <i>NOL7</i>     | 4.08e-04 |
| 229194_at   | 84333  | <i>PCGF5</i>    | 4.08e-04 |
| 228571_at   | 57786  | <i>RBAK</i>     | 4.09e-04 |
| 221473_x_at | 10955  | <i>SERINC3</i>  | 4.11e-04 |
| 221743_at   | 10658  | <i>CELF1</i>    | 4.12e-04 |
| 204982_at   | 9815   | <i>GIT2</i>     | 4.13e-04 |
| 217965_s_at | 29115  | <i>SAP30BP</i>  | 4.13e-04 |
| 238444_at   | 114991 | <i>ZNF618</i>   | 4.15e-04 |
| 241642_x_at | 9874   | <i>TLK1</i>     | 4.16e-04 |
| 210386_s_at | 4580   | <i>MTX1</i>     | 4.18e-04 |
| 202171_at   | 7716   | <i>VEZF1</i>    | 4.19e-04 |
| 218873_at   | 54856  | <i>GON4L</i>    | 4.19e-04 |
| 201983_s_at | 1956   | <i>EGFR</i>     | 4.20e-04 |
| 210479_s_at | 6095   | <i>RORA</i>     | 4.21e-04 |
| 202631_s_at | 10513  | <i>APPBP2</i>   | 4.22e-04 |
| 212487_at   | 23131  | <i>GPATCH8</i>  | 4.22e-04 |
| 202868_s_at | 10775  | <i>POP4</i>     | 4.23e-04 |
| 207966_s_at | 2734   | <i>GLG1</i>     | 4.24e-04 |
| 214494_s_at | 6687   | <i>SPG7</i>     | 4.24e-04 |
| 212345_s_at | 64764  | <i>CREB3L2</i>  | 4.25e-04 |
| 209050_s_at | 5900   | <i>RALGDS</i>   | 4.27e-04 |
| 214431_at   | 8833   | <i>GMPS</i>     | 4.28e-04 |
| 207305_s_at | 22878  | <i>TRAPPC8</i>  | 4.28e-04 |
| 221763_at   | 221037 | <i>JMJD1C</i>   | 4.28e-04 |
| 203257_s_at | 79096  | <i>C11orf49</i> | 4.29e-04 |
| 225892_at   | 3658   | <i>IREB2</i>    | 4.30e-04 |
| 202225_at   | 1398   | <i>CRK</i>      | 4.32e-04 |
| 211285_s_at | 7337   | <i>UBE3A</i>    | 4.32e-04 |
| 221897_at   | 84851  | <i>TRIM52</i>   | 4.32e-04 |
| 202864_s_at | 6672   | <i>SP100</i>    | 4.33e-04 |
| 214144_at   | 5433   | <i>POLR2D</i>   | 4.34e-04 |
| 228301_x_at | 4716   | <i>NDUFB10</i>  | 4.36e-04 |
| 229467_at   | 5094   | <i>PCBP2</i>    | 4.36e-04 |
| 214550_s_at | 23534  | <i>TNPO3</i>    | 4.37e-04 |
| 222673_x_at | 159090 | <i>FAM122B</i>  | 4.37e-04 |
| 203211_s_at | 8898   | <i>MTMR2</i>    | 4.39e-04 |
| 227047_x_at | 57659  | <i>ZBTB4</i>    | 4.39e-04 |
| 227577_at   | 149371 | <i>EXOC8</i>    | 4.39e-04 |
| 202484_s_at | 8932   | <i>MBD2</i>     | 4.41e-04 |
| 217538_at   | 9905   | <i>SGSM2</i>    | 4.41e-04 |

|             |        |                  |          |
|-------------|--------|------------------|----------|
| 224892_at   | 26258  | <i>BLOC1S6</i>   | 4.42e-04 |
| 214422_at   | 5887   | <i>RAD23B</i>    | 4.43e-04 |
| 222997_s_at | 54460  | <i>MRPS21</i>    | 4.43e-04 |
| 221986_s_at | 54800  | <i>KLHL24</i>    | 4.43e-04 |
| 222527_s_at | 55696  | <i>RBM22</i>     | 4.43e-04 |
| 218147_s_at | 55830  | <i>GLT8D1</i>    | 4.44e-04 |
| 1561079_at  | 23243  | <i>ANKRD28</i>   | 4.45e-04 |
| 219972_s_at | 64430  | <i>PCNXL4</i>    | 4.48e-04 |
| 235339_at   | 83852  | <i>SETDB2</i>    | 4.49e-04 |
| 212440_at   | 11017  | <i>SNRNP27</i>   | 4.50e-04 |
| 208843_s_at | 26003  | <i>GORASP2</i>   | 4.51e-04 |
| 218277_s_at | 79665  | <i>DHX40</i>     | 4.52e-04 |
| 203095_at   | 4528   | <i>MTIF2</i>     | 4.53e-04 |
| 208946_s_at | 8678   | <i>BECN1</i>     | 4.54e-04 |
| 226666_at   | 23002  | <i>DAAM1</i>     | 4.54e-04 |
| 204048_s_at | 9749   | <i>PHACTR2</i>   | 4.55e-04 |
| 225932_s_at | 3181   | <i>HNRNPA2B1</i> | 4.57e-04 |
| 201448_at   | 7072   | <i>TIA1</i>      | 4.57e-04 |
| 212787_at   | 56252  | <i>YLPM1</i>     | 4.57e-04 |
| 212794_s_at | 23325  | <i>KIAA1033</i>  | 4.59e-04 |
| 211609_x_at | 5710   | <i>PSMD4</i>     | 4.61e-04 |
| 209265_s_at | 56339  | <i>METTL3</i>    | 4.61e-04 |
| 201737_s_at | 10299  | <i>MARCH6</i>    | 4.62e-04 |
| 212406_s_at | 55251  | <i>PCMTD2</i>    | 4.63e-04 |
| 207700_s_at | 8202   | <i>NCOA3</i>     | 4.68e-04 |
| 227639_at   | 10026  | <i>PIGK</i>      | 4.72e-04 |
| 211724_x_at | 54468  | <i>MIOS</i>      | 4.73e-04 |
| 220349_s_at | 64772  | <i>ENGASE</i>    | 4.73e-04 |
| 212411_at   | 92856  | <i>IMP4</i>      | 4.73e-04 |
| 204690_at   | 9482   | <i>STX8</i>      | 4.74e-04 |
| 212030_at   | 58517  | <i>RBM25</i>     | 4.77e-04 |
| 219080_s_at | 56474  | <i>CTPS2</i>     | 4.79e-04 |
| 209382_at   | 10623  | <i>POLR3C</i>    | 4.81e-04 |
| 37943_at    | 23503  | <i>ZFYVE26</i>   | 4.82e-04 |
| 91617_at    | 54487  | <i>DGCR8</i>     | 4.84e-04 |
| 203285_s_at | 9653   | <i>HS2ST1</i>    | 4.85e-04 |
| 222624_s_at | 51193  | <i>ZNF639</i>    | 4.87e-04 |
| 202698_x_at | 1327   | <i>COX4I1</i>    | 4.88e-04 |
| 219688_at   | 55212  | <i>BBS7</i>      | 4.88e-04 |
| 238497_at   | 219902 | <i>TMEM136</i>   | 4.88e-04 |

|              |        |                 |          |
|--------------|--------|-----------------|----------|
| 236561_at    | 7046   | <i>TGFBR1</i>   | 4.89e-04 |
| 208822_s_at  | 7818   | <i>DAP3</i>     | 4.89e-04 |
| 212010_s_at  | 55573  | <i>CDV3</i>     | 4.90e-04 |
| 229322_at    | 5529   | <i>PPP2R5E</i>  | 4.93e-04 |
| 223701_s_at  | 55031  | <i>USP47</i>    | 4.95e-04 |
| 213505_s_at  | 10147  | <i>SUGP2</i>    | 4.96e-04 |
| 1560013_at   | 23042  | <i>PDXDC1</i>   | 4.97e-04 |
| 214790_at    | 26054  | <i>SENP6</i>    | 4.98e-04 |
| 226326_at    | 84333  | <i>PCGF5</i>    | 5.00e-04 |
| 37549_g_at   | 27241  | <i>BBS9</i>     | 5.01e-04 |
| 219861_at    | 55192  | <i>DNAJC17</i>  | 5.01e-04 |
| 220935_s_at  | 55755  | <i>CDK5RAP2</i> | 5.02e-04 |
| 206052_s_at  | 7884   | <i>SLBP</i>     | 5.03e-04 |
| 223227_at    | 583    | <i>BBS2</i>     | 5.04e-04 |
| 205006_s_at  | 9397   | <i>NMT2</i>     | 5.05e-04 |
| 201813_s_at  | 9779   | <i>TBC1D5</i>   | 5.06e-04 |
| 215188_at    | 8428   | <i>STK24</i>    | 5.14e-04 |
| 202776_at    | 30836  | <i>DNTTIP2</i>  | 5.15e-04 |
| 224764_at    | 57584  | <i>ARHGAP21</i> | 5.15e-04 |
| 202347_s_at  | 3093   | <i>UBE2K</i>    | 5.16e-04 |
| 201392_s_at  | 3482   | <i>IGF2R</i>    | 5.16e-04 |
| 229027_at    | 5494   | <i>PPM1A</i>    | 5.16e-04 |
| 202584_at    | 4799   | <i>NFX1</i>     | 5.17e-04 |
| 241938_at    | 9444   | <i>QKI</i>      | 5.17e-04 |
| 204106_at    | 7016   | <i>TESK1</i>    | 5.18e-04 |
| 238176_at    | 9693   | <i>RAPGEF2</i>  | 5.18e-04 |
| 219158_s_at  | 80155  | <i>NAA15</i>    | 5.18e-04 |
| 1553750_a_at | 143684 | <i>FAM76B</i>   | 5.18e-04 |
| 234701_at    | 29123  | <i>ANKRD11</i>  | 5.19e-04 |
| 209023_s_at  | 10735  | <i>STAG2</i>    | 5.20e-04 |
| 220547_s_at  | 54537  | <i>FAM35A</i>   | 5.20e-04 |
| 225607_at    | 124808 | <i>CCDC43</i>   | 5.20e-04 |
| 242669_at    | 51569  | <i>UFM1</i>     | 5.23e-04 |
| 222681_at    | 56983  | <i>POGLUT1</i>  | 5.23e-04 |
| 243589_at    | 284058 | <i>KANSL1</i>   | 5.23e-04 |
| 212600_s_at  | 7385   | <i>UQCRC2</i>   | 5.24e-04 |
| 221556_at    | 8555   | <i>CDC14B</i>   | 5.29e-04 |
| 238886_at    | 10972  | <i>TMED10</i>   | 5.33e-04 |
| 221264_s_at  | 23435  | <i>TARDBP</i>   | 5.34e-04 |
| 202916_s_at  | 9917   | <i>FAM20B</i>   | 5.37e-04 |

|              |        |                 |          |
|--------------|--------|-----------------|----------|
| 222269_at    | 139322 | <i>APOOL</i>    | 5.37e-04 |
| 202040_s_at  | 5927   | <i>KDM5A</i>    | 5.38e-04 |
| 218343_s_at  | 9330   | <i>GTF3C3</i>   | 5.38e-04 |
| 210453_x_at  | 10632  | <i>ATP5L</i>    | 5.39e-04 |
| 219156_at    | 55333  | <i>SYNJ2BP</i>  | 5.39e-04 |
| 218397_at    | 55120  | <i>FANCL</i>    | 5.40e-04 |
| 222048_at    | 1416   | <i>CRYBB2P1</i> | 5.41e-04 |
| 201340_s_at  | 8507   | <i>ENC1</i>     | 5.41e-04 |
| 233637_at    | 50717  | <i>DCAF8</i>    | 5.41e-04 |
| 200048_s_at  | 10899  | <i>JTB</i>      | 5.42e-04 |
| 238076_at    | 57459  | <i>GATAD2B</i>  | 5.43e-04 |
| 219242_at    | 80254  | <i>CEP63</i>    | 5.43e-04 |
| 224933_s_at  | 221037 | <i>JMJD1C</i>   | 5.43e-04 |
| 239660_at    | 57186  | <i>RALGAPA2</i> | 5.46e-04 |
| 226345_at    | 221079 | <i>ARL5B</i>    | 5.47e-04 |
| 200772_x_at  | 5757   | <i>PTMA</i>     | 5.48e-04 |
| 219062_s_at  | 54877  | <i>ZCCHC2</i>   | 5.48e-04 |
| 228590_at    | 55037  | <i>PTCD3</i>    | 5.50e-04 |
| 220046_s_at  | 57018  | <i>CCNL1</i>    | 5.51e-04 |
| 227918_s_at  | 79699  | <i>ZYG11B</i>   | 5.51e-04 |
| 202909_at    | 9852   | <i>EPM2AIP1</i> | 5.53e-04 |
| 209422_at    | 51230  | <i>PHF20</i>    | 5.54e-04 |
| 212840_at    | 26043  | <i>UBXN7</i>    | 5.56e-04 |
| 227772_at    | 9113   | <i>LATS1</i>    | 5.57e-04 |
| 233078_at    | 8539   | <i>API5</i>     | 5.58e-04 |
| 219348_at    | 55850  | <i>USE1</i>     | 5.58e-04 |
| 219200_at    | 79072  | <i>FASTKD3</i>  | 5.60e-04 |
| 217427_s_at  | 7290   | <i>HIRA</i>     | 5.62e-04 |
| 213480_at    | 8674   | <i>VAMP4</i>    | 5.62e-04 |
| 213390_at    | 23211  | <i>ZC3H4</i>    | 5.62e-04 |
| 214141_x_at  | 6432   | <i>SRSF7</i>    | 5.63e-04 |
| 226214_at    | 51573  | <i>GDE1</i>     | 5.65e-04 |
| 225668_at    | 134145 | <i>FAM173B</i>  | 5.66e-04 |
| 218102_at    | 51071  | <i>DERA</i>     | 5.67e-04 |
| 218846_at    | 9439   | <i>MED23</i>    | 5.69e-04 |
| 1569107_s_at | 339559 | <i>ZNF642</i>   | 5.69e-04 |
| 207338_s_at  | 7752   | <i>ZNF200</i>   | 5.72e-04 |
| 203319_s_at  | 7707   | <i>ZNF148</i>   | 5.78e-04 |
| 222757_s_at  | 51776  | <i>ZAK</i>      | 5.80e-04 |
| 218057_x_at  | 10328  | <i>EMC8</i>     | 5.81e-04 |

|             |           |                  |          |
|-------------|-----------|------------------|----------|
| 230712_at   | 55672     | <i>NBPF1</i>     | 5.83e-04 |
| 235216_at   | 114799    | <i>ESCO1</i>     | 5.84e-04 |
| 201505_at   | 3912      | <i>LAMB1</i>     | 5.85e-04 |
| 206551_x_at | 54800     | <i>KLHL24</i>    | 5.89e-04 |
| 243198_at   | 374618    | <i>TEX9</i>      | 5.90e-04 |
| 239695_at   | 3716      | <i>JAK1</i>      | 5.92e-04 |
| 224926_at   | 60412     | <i>EXOC4</i>     | 5.92e-04 |
| 235689_at   | 123263    | <i>MTFMT</i>     | 5.92e-04 |
| 221580_s_at | 79101     | <i>TAF1D</i>     | 5.93e-04 |
| 228385_at   | 83479     | <i>DDX59</i>     | 5.93e-04 |
| 1565703_at  | 4089      | <i>SMAD4</i>     | 5.94e-04 |
| 222056_s_at | 51011     | <i>FAHD2A</i>    | 5.95e-04 |
| 204617_s_at | 65057     | <i>ACD</i>       | 5.96e-04 |
| 223040_at   | 51126     | <i>NAA20</i>     | 5.97e-04 |
| 234950_s_at | 64326     | <i>RFWD2</i>     | 5.97e-04 |
| 206874_s_at | 9748      | <i>SLK</i>       | 5.99e-04 |
| 233866_at   | 51088     | <i>KLHL5</i>     | 6.01e-04 |
| 202774_s_at | 6433      | <i>SFSWAP</i>    | 6.03e-04 |
| 200947_s_at | 2746      | <i>GLUD1</i>     | 6.04e-04 |
| 225472_at   | 7918      | <i>GPANK1</i>    | 6.04e-04 |
| 226033_at   | 57478     | <i>USP31</i>     | 6.08e-04 |
| 213571_s_at | 9470      | <i>EIF4E2</i>    | 6.10e-04 |
| 228397_at   | 55000     | <i>TUG1</i>      | 6.10e-04 |
| 1553185_at  | 158158    | <i>RASEF</i>     | 6.11e-04 |
| 224667_x_at | 119504    | <i>ANAPC16</i>   | 6.12e-04 |
| 227859_at   | 51277     | <i>DNAJC27</i>   | 6.17e-04 |
| 221492_s_at | 64422     | <i>ATG3</i>      | 6.19e-04 |
| 225082_at   | 51692     | <i>CPSF3</i>     | 6.20e-04 |
| 235241_at   | 153129    | <i>SLC38A9</i>   | 6.20e-04 |
| 227433_at   | 205717    | <i>KIAA2018</i>  | 6.20e-04 |
| 200849_s_at | 10768     | <i>AHCYL1</i>    | 6.21e-04 |
| 225622_at   | 55824     | <i>PAG1</i>      | 6.21e-04 |
| 227567_at   | 100499466 | <i>LINC00674</i> | 6.22e-04 |
| 243887_at   | 51263     | <i>MRPL30</i>    | 6.23e-04 |
| 224414_s_at | 84674     | <i>CARD6</i>     | 6.23e-04 |
| 227520_at   | 55787     | <i>TXLNG</i>     | 6.28e-04 |
| 200094_s_at | 1938      | <i>EEF2</i>      | 6.30e-04 |
| 227157_at   | 201973    | <i>CCDC111</i>   | 6.30e-04 |
| 226180_at   | 134430    | <i>WDR36</i>     | 6.32e-04 |
| 203598_s_at | 11193     | <i>WBP4</i>      | 6.36e-04 |

|              |           |                     |          |
|--------------|-----------|---------------------|----------|
| 214263_x_at  | 5432      | <i>POLR2C</i>       | 6.37e-04 |
| 218430_s_at  | 64864     | <i>RFX7</i>         | 6.39e-04 |
| 217797_at    | 51506     | <i>UFC1</i>         | 6.45e-04 |
| 219037_at    | 51018     | <i>RRP15</i>        | 6.46e-04 |
| 1558678_s_at | 378938    | <i>MALAT1</i>       | 6.46e-04 |
| 217858_s_at  | 51566     | <i>ARMCX3</i>       | 6.48e-04 |
| 219477_s_at  | 55901     | <i>THSD1</i>        | 6.48e-04 |
| 223033_s_at  | 57410     | <i>SCYL1</i>        | 6.48e-04 |
| 226968_at    | 23095     | <i>KIF1B</i>        | 6.50e-04 |
| 230072_at    | 64786     | <i>TBC1D15</i>      | 6.50e-04 |
| 202544_at    | 2764      | <i>GMFB</i>         | 6.51e-04 |
| 201713_s_at  | 5903      | <i>RANBP2</i>       | 6.51e-04 |
| 235021_at    | 158358    | <i>KIAA2026</i>     | 6.51e-04 |
| 212557_at    | 26036     | <i>ZNF451</i>       | 6.53e-04 |
| 212888_at    | 23405     | <i>DICER1</i>       | 6.54e-04 |
| 221654_s_at  | 9960      | <i>USP3</i>         | 6.55e-04 |
| 244165_at    | 54906     | <i>FAM208B</i>      | 6.55e-04 |
| 209012_at    | 7204      | <i>TRIO</i>         | 6.57e-04 |
| 216305_s_at  | 6936      | <i>GCFC2</i>        | 6.60e-04 |
| 209127_s_at  | 9733      | <i>SART3</i>        | 6.61e-04 |
| 224280_s_at  | 56181     | <i>FAM54B</i>       | 6.61e-04 |
| 241370_at    | 286052    | <i>LOC286052</i>    | 6.61e-04 |
| 220305_at    | 57506     | <i>MAVS</i>         | 6.62e-04 |
| 218047_at    | 114883    | <i>OSBPL9</i>       | 6.63e-04 |
| 212622_at    | 440026    | <i>TMEM41B</i>      | 6.64e-04 |
| 212620_at    | 23060     | <i>ZNF609</i>       | 6.65e-04 |
| 226758_at    | 51631     | <i>LUC7L2</i>       | 6.65e-04 |
| 235615_at    | 5229      | <i>PGGT1B</i>       | 6.67e-04 |
| 215529_x_at  | 23181     | <i>DIP2A</i>        | 6.69e-04 |
| 218957_s_at  | 80227     | <i>PAAF1</i>        | 6.69e-04 |
| 228549_at    | 9725      | <i>TMEM63A</i>      | 6.70e-04 |
| 57703_at     | 205564    | <i>SENP5</i>        | 6.70e-04 |
| 223247_at    | 84246     | <i>MED10</i>        | 6.72e-04 |
| 225951_s_at  | 100507217 | <i>LOC100507217</i> | 6.74e-04 |
| 216563_at    | 23253     | <i>ANKRD12</i>      | 6.75e-04 |
| 201057_s_at  | 2804      | <i>GOLGB1</i>       | 6.78e-04 |
| 201528_at    | 6117      | <i>RPA1</i>         | 6.81e-04 |
| 229272_at    | 23360     | <i>FNBP4</i>        | 6.83e-04 |
| 238845_at    | 7782      | <i>SLC30A4</i>      | 6.89e-04 |
| 203544_s_at  | 8027      | <i>STAM</i>         | 6.89e-04 |

|             |        |                 |          |
|-------------|--------|-----------------|----------|
| 235195_at   | 26190  | <i>FBXW2</i>    | 6.90e-04 |
| 212894_at   | 6832   | <i>SUPV3L1</i>  | 6.92e-04 |
| 1568805_at  | 135112 | <i>NCOA7</i>    | 6.92e-04 |
| 201200_at   | 8804   | <i>CREG1</i>    | 6.93e-04 |
| 213930_at   | 9140   | <i>ATG12</i>    | 6.93e-04 |
| 232597_x_at | 9169   | <i>SCAF11</i>   | 6.93e-04 |
| 220512_at   | 10395  | <i>DLC1</i>     | 6.93e-04 |
| 201178_at   | 25793  | <i>FBXO7</i>    | 6.93e-04 |
| 211947_s_at | 23215  | <i>PRRC2C</i>   | 6.96e-04 |
| 212522_at   | 5151   | <i>PDE8A</i>    | 6.97e-04 |
| 207624_s_at | 6103   | <i>RPGR</i>     | 6.98e-04 |
| 218329_at   | 11108  | <i>PRDM4</i>    | 6.98e-04 |
| 212785_s_at | 51574  | <i>LARP7</i>    | 6.98e-04 |
| 228225_at   | 5828   | <i>PEX2</i>     | 6.99e-04 |
| 226986_at   | 26100  | <i>WIPI2</i>    | 6.99e-04 |
| 224858_at   | 25921  | <i>ZDHHC5</i>   | 7.01e-04 |
| 225244_at   | 116841 | <i>SNAP47</i>   | 7.02e-04 |
| 200058_s_at | 23020  | <i>SNRNP200</i> | 7.04e-04 |
| 225730_s_at | 25917  | <i>THUMPD3</i>  | 7.07e-04 |
| 200789_at   | 1891   | <i>ECH1</i>     | 7.11e-04 |
| 218616_at   | 57117  | <i>INTS12</i>   | 7.12e-04 |
| 203694_s_at | 8449   | <i>DHX16</i>    | 7.13e-04 |
| 223320_s_at | 23456  | <i>ABCB10</i>   | 7.14e-04 |
| 204226_at   | 27067  | <i>STAU2</i>    | 7.14e-04 |
| 226293_at   | 219541 | <i>MED19</i>    | 7.15e-04 |
| 241843_at   | 677811 | <i>SNORA28</i>  | 7.18e-04 |
| 222737_s_at | 29117  | <i>BRD7</i>     | 7.20e-04 |
| 215952_s_at | 4946   | <i>OAZ1</i>     | 7.21e-04 |
| 225132_at   | 26224  | <i>FBXL3</i>    | 7.21e-04 |
| 1561274_at  | 1416   | <i>CRYBB2P1</i> | 7.24e-04 |
| 203978_at   | 4682   | <i>NUBP1</i>    | 7.24e-04 |
| 221555_x_at | 8555   | <i>CDC14B</i>   | 7.27e-04 |
| 236231_at   | 10778  | <i>ZNF271</i>   | 7.29e-04 |
| 212780_at   | 6654   | <i>SOS1</i>     | 7.31e-04 |
| 212467_at   | 23317  | <i>DNAJC13</i>  | 7.31e-04 |
| 220094_s_at | 63933  | <i>CCDC90A</i>  | 7.33e-04 |
| 226660_at   | 6198   | <i>RPS6KB1</i>  | 7.35e-04 |
| 36552_at    | 26005  | <i>C2CD3</i>    | 7.37e-04 |
| 212066_s_at | 9736   | <i>USP34</i>    | 7.38e-04 |
| 228177_at   | 1387   | <i>CREBBP</i>   | 7.42e-04 |

|              |        |                  |          |
|--------------|--------|------------------|----------|
| 218830_at    | 51121  | <i>RPL26L1</i>   | 7.43e-04 |
| 203449_s_at  | 7013   | <i>TERF1</i>     | 7.44e-04 |
| 223133_at    | 81853  | <i>TMEM14B</i>   | 7.44e-04 |
| 227565_at    | 51088  | <i>KLHL5</i>     | 7.46e-04 |
| 203247_s_at  | 7572   | <i>ZNF24</i>     | 7.47e-04 |
| 226749_at    | 64965  | <i>MRPS9</i>     | 7.48e-04 |
| 224984_at    | 10725  | <i>NFAT5</i>     | 7.49e-04 |
| 208746_x_at  | 10632  | <i>ATP5L</i>     | 7.51e-04 |
| 223295_s_at  | 55692  | <i>LUC7L</i>     | 7.52e-04 |
| 202906_s_at  | 4683   | <i>NBN</i>       | 7.55e-04 |
| 208922_s_at  | 10482  | <i>NXF1</i>      | 7.55e-04 |
| 229436_x_at  | 79184  | <i>BRCC3</i>     | 7.55e-04 |
| 219625_s_at  | 10087  | <i>COL4A3BP</i>  | 7.61e-04 |
| 242918_at    | 4678   | <i>NASP</i>      | 7.64e-04 |
| 212867_at    | 10499  | <i>NCOA2</i>     | 7.66e-04 |
| 202266_at    | 51567  | <i>TDP2</i>      | 7.69e-04 |
| 201184_s_at  | 1108   | <i>CHD4</i>      | 7.70e-04 |
| 227964_at    | 83786  | <i>FRMD8</i>     | 7.70e-04 |
| 219981_x_at  | 84914  | <i>ZNF587</i>    | 7.77e-04 |
| 221481_x_at  | 3184   | <i>HNRNPD</i>    | 7.81e-04 |
| 229429_x_at  | 728855 | <i>LINC00623</i> | 7.81e-04 |
| 228435_at    | 55527  | <i>FEM1A</i>     | 7.83e-04 |
| 1557071_s_at | 51667  | <i>NUB1</i>      | 7.87e-04 |
| 1568865_at   | 2342   | <i>FNTB</i>      | 7.88e-04 |
| 229706_at    | 10915  | <i>TCERG1</i>    | 7.88e-04 |
| 222488_s_at  | 51164  | <i>DCTN4</i>     | 7.88e-04 |
| 223526_at    | 83608  | <i>C18orf21</i>  | 7.88e-04 |
| 222380_s_at  | 10016  | <i>PDCD6</i>     | 7.89e-04 |
| 202636_at    | 7844   | <i>RNF103</i>    | 7.91e-04 |
| 209388_at    | 10914  | <i>PAPOLA</i>    | 7.91e-04 |
| 208616_s_at  | 8073   | <i>PTP4A2</i>    | 7.92e-04 |
| 212655_at    | 23174  | <i>ZCCHC14</i>   | 7.93e-04 |
| 228095_at    | 9678   | <i>PHF14</i>     | 7.96e-04 |
| 209063_x_at  | 10605  | <i>PAIP1</i>     | 7.96e-04 |
| 228316_at    | 130162 | <i>CLHC1</i>     | 7.96e-04 |
| 1556283_s_at | 26127  | <i>FGFR1OP2</i>  | 8.02e-04 |
| 226696_at    | 10741  | <i>RBBP9</i>     | 8.03e-04 |
| 224692_at    | 84919  | <i>PPP1R15B</i>  | 8.03e-04 |
| 201924_at    | 4299   | <i>AFF1</i>      | 8.04e-04 |
| 216060_s_at  | 23002  | <i>DAAMI</i>     | 8.08e-04 |



|              |           |                     |          |
|--------------|-----------|---------------------|----------|
| 217906_at    | 23588     | <i>KLHDC2</i>       | 8.10e-04 |
| 220764_at    | 151987    | <i>PPP4R2</i>       | 8.12e-04 |
| 222400_s_at  | 55256     | <i>ADII</i>         | 8.14e-04 |
| 223161_at    | 57189     | <i>KIAA1147</i>     | 8.15e-04 |
| 200028_s_at  | 56910     | <i>STARD7</i>       | 8.17e-04 |
| 226300_at    | 219541    | <i>MED19</i>        | 8.17e-04 |
| 209920_at    | 659       | <i>BMPR2</i>        | 8.19e-04 |
| 230183_at    | 2131      | <i>EXT1</i>         | 8.20e-04 |
| 34858_at     | 23510     | <i>KCTD2</i>        | 8.20e-04 |
| 1554250_s_at | 375593    | <i>TRIM73</i>       | 8.20e-04 |
| 229010_at    | 867       | <i>CBL</i>          | 8.22e-04 |
| 223983_s_at  | 83636     | <i>C19orf12</i>     | 8.24e-04 |
| 222239_s_at  | 26512     | <i>INTS6</i>        | 8.25e-04 |
| 228986_at    | 114882    | <i>OSBPL8</i>       | 8.26e-04 |
| 201038_s_at  | 8125      | <i>ANP32A</i>       | 8.27e-04 |
| 229520_s_at  | 55668     | <i>C14orf118</i>    | 8.27e-04 |
| 1553274_a_at | 154007    | <i>SNRNP48</i>      | 8.27e-04 |
| 225992_at    | 8028      | <i>MLLT10</i>       | 8.28e-04 |
| 224024_at    | 57222     | <i>ERGIC1</i>       | 8.31e-04 |
| 223763_at    | 84062     | <i>DTNBP1</i>       | 8.31e-04 |
| 201993_x_at  | 9987      | <i>HNRPDL</i>       | 8.32e-04 |
| 202144_s_at  | 158       | <i>ADSL</i>         | 8.33e-04 |
| 240282_at    | 9948      | <i>WDR1</i>         | 8.33e-04 |
| 233775_x_at  | 100289333 | <i>LOC100289333</i> | 8.33e-04 |
| 213465_s_at  | 5510      | <i>PPP1R7</i>       | 8.34e-04 |
| 218386_x_at  | 10600     | <i>USP16</i>        | 8.36e-04 |
| 226901_at    | 284018    | <i>C17orf58</i>     | 8.38e-04 |
| 213123_at    | 4238      | <i>MFAP3</i>        | 8.39e-04 |
| 238041_at    | 6938      | <i>TCF12</i>        | 8.39e-04 |
| 215773_x_at  | 10038     | <i>PARP2</i>        | 8.41e-04 |
| 221267_s_at  | 81926     | <i>FAM108A1</i>     | 8.41e-04 |
| 213032_at    | 4781      | <i>NFIB</i>         | 8.42e-04 |
| 202163_s_at  | 9337      | <i>CNOT8</i>        | 8.43e-04 |
| 201152_s_at  | 4154      | <i>MBNL1</i>        | 8.44e-04 |
| 214162_at    | 284244    | <i>LOC284244</i>    | 8.44e-04 |
| 203494_s_at  | 9702      | <i>CEP57</i>        | 8.45e-04 |
| 236431_at    | 23350     | <i>U2SURP</i>       | 8.46e-04 |
| 233654_at    | 54872     | <i>PIGG</i>         | 8.47e-04 |
| 235253_at    | 5810      | <i>RAD1</i>         | 8.48e-04 |
| 204097_s_at  | 51634     | <i>RBMX2</i>        | 8.49e-04 |

|             |        |                 |          |
|-------------|--------|-----------------|----------|
| 239005_at   | 388685 | <i>FLJ39739</i> | 8.52e-04 |
| 214787_at   | 10260  | <i>DENND4A</i>  | 8.57e-04 |
| 211948_x_at | 23215  | <i>PRRC2C</i>   | 8.57e-04 |
| 224729_s_at | 64756  | <i>ATPAF1</i>   | 8.57e-04 |
| 235949_at   | 79989  | <i>TTC26</i>    | 8.58e-04 |
| 226945_at   | 84236  | <i>RHBDD1</i>   | 8.58e-04 |
| 213025_at   | 55623  | <i>THUMPD1</i>  | 8.59e-04 |
| 225838_at   | 26122  | <i>EPC2</i>     | 8.60e-04 |
| 225866_at   | 84154  | <i>RPF2</i>     | 8.62e-04 |
| 212855_at   | 23142  | <i>DCUNID4</i>  | 8.63e-04 |
| 219192_at   | 55833  | <i>UBAP2</i>    | 8.64e-04 |
| 209759_s_at | 1632   | <i>ECI1</i>     | 8.66e-04 |
| 201912_s_at | 2935   | <i>GSPT1</i>    | 8.67e-04 |
| 218996_at   | 29844  | <i>TFPT</i>     | 8.67e-04 |
| 212881_at   | 51588  | <i>PIAS4</i>    | 8.67e-04 |
| 219754_at   | 55285  | <i>RBM41</i>    | 8.68e-04 |
| 218987_at   | 55729  | <i>ATF7IP</i>   | 8.68e-04 |
| 228012_at   | 9782   | <i>MATR3</i>    | 8.69e-04 |
| 201488_x_at | 10657  | <i>KHDRBS1</i>  | 8.69e-04 |
| 218841_at   | 140461 | <i>ASB8</i>     | 8.69e-04 |
| 233461_x_at | 7769   | <i>ZNF226</i>   | 8.70e-04 |
| 222975_s_at | 7812   | <i>CSDE1</i>    | 8.70e-04 |
| 225821_s_at | 259282 | <i>BOD1L1</i>   | 8.73e-04 |
| 203625_x_at | 6502   | <i>SKP2</i>     | 8.75e-04 |
| 214113_s_at | 9939   | <i>RBM8A</i>    | 8.76e-04 |
| 218947_s_at | 55149  | <i>MTPAP</i>    | 8.76e-04 |
| 241384_x_at | 256356 | <i>GK5</i>      | 8.76e-04 |
| 213286_at   | 51663  | <i>ZFR</i>      | 8.79e-04 |
| 221712_s_at | 54663  | <i>WDR74</i>    | 8.80e-04 |
| 223168_at   | 58480  | <i>RHOU</i>     | 8.80e-04 |
| 203290_at   | 3117   | <i>HLA-DQA1</i> | 8.84e-04 |
| 226760_at   | 51360  | <i>MBTPS2</i>   | 8.84e-04 |
| 226164_x_at | 57494  | <i>RIMKLB</i>   | 8.85e-04 |
| 209025_s_at | 10492  | <i>SYNCRIP</i>  | 8.86e-04 |
| 225880_at   | 163590 | <i>TOR1AIP2</i> | 8.86e-04 |
| 200072_s_at | 4670   | <i>HNRNPM</i>   | 8.87e-04 |
| 205511_at   | 55056  | <i>FLJ10038</i> | 8.89e-04 |
| 242665_at   | 114793 | <i>FMNL2</i>    | 8.89e-04 |
| 200067_x_at | 8724   | <i>SNX3</i>     | 8.91e-04 |
| 221749_at   | 253943 | <i>YTHDF3</i>   | 8.93e-04 |

|              |        |                 |          |
|--------------|--------|-----------------|----------|
| 213517_at    | 5094   | <i>PCBP2</i>    | 8.94e-04 |
| 220212_s_at  | 63892  | <i>THADA</i>    | 8.94e-04 |
| 225985_at    | 5562   | <i>PRKAA1</i>   | 8.95e-04 |
| 213455_at    | 92689  | <i>FAM114A1</i> | 8.96e-04 |
| 1559739_at   | 56994  | <i>CHPT1</i>    | 8.97e-04 |
| 1564520_s_at | 10419  | <i>PRMT5</i>    | 8.98e-04 |
| 1568618_a_at | 2589   | <i>GALNT1</i>   | 8.99e-04 |
| 204080_at    | 114034 | <i>TOE1</i>     | 9.00e-04 |
| 212783_at    | 5930   | <i>RBBP6</i>    | 9.01e-04 |
| 204373_s_at  | 9857   | <i>CEP350</i>   | 9.03e-04 |
| 219069_at    | 54851  | <i>ANKRD49</i>  | 9.03e-04 |
| 202060_at    | 9646   | <i>CTR9</i>     | 9.04e-04 |
| 218231_at    | 55577  | <i>NAGK</i>     | 9.09e-04 |
| 1555844_s_at | 4670   | <i>HNRNPM</i>   | 9.11e-04 |
| 203762_s_at  | 51626  | <i>DYNC2L1I</i> | 9.14e-04 |
| 201146_at    | 4780   | <i>NFE2L2</i>   | 9.16e-04 |
| 200711_s_at  | 6500   | <i>SKP1</i>     | 9.16e-04 |
| 218593_at    | 55131  | <i>RBM28</i>    | 9.23e-04 |
| 212981_s_at  | 9747   | <i>FAM115A</i>  | 9.24e-04 |
| 243618_s_at  | 152485 | <i>ZNF827</i>   | 9.24e-04 |
| 228856_at    | 65988  | <i>ZNF747</i>   | 9.25e-04 |
| 225213_at    | 160760 | <i>PPTC7</i>    | 9.26e-04 |
| 201745_at    | 5756   | <i>TWF1</i>     | 9.28e-04 |
| 225461_at    | 79813  | <i>EHMT1</i>    | 9.28e-04 |
| 223212_at    | 84287  | <i>ZDHHC16</i>  | 9.30e-04 |
| 202332_at    | 1454   | <i>CSNK1E</i>   | 9.31e-04 |
| 217760_at    | 54765  | <i>TRIM44</i>   | 9.31e-04 |
| 242761_s_at  | 147923 | <i>ZNF420</i>   | 9.39e-04 |
| 201683_x_at  | 9878   | <i>TOX4</i>     | 9.44e-04 |
| 238510_at    | 124411 | <i>ZNF720</i>   | 9.45e-04 |
| 202862_at    | 2184   | <i>FAH</i>      | 9.46e-04 |
| 203966_s_at  | 5494   | <i>PPM1A</i>    | 9.47e-04 |
| 209430_at    | 9044   | <i>BTAFI</i>    | 9.47e-04 |
| 220171_x_at  | 55425  | <i>KIAA1704</i> | 9.47e-04 |
| 226447_at    | 55870  | <i>ASH1L</i>    | 9.48e-04 |
| 212341_at    | 286451 | <i>YIPF6</i>    | 9.48e-04 |
| 224983_at    | 950    | <i>SCARB2</i>   | 9.49e-04 |
| 200899_s_at  | 10724  | <i>MGEA5</i>    | 9.51e-04 |
| 225073_at    | 51535  | <i>PPHLN1</i>   | 9.51e-04 |
| 218003_s_at  | 2287   | <i>FKBP3</i>    | 9.52e-04 |

|              |        |                      |          |
|--------------|--------|----------------------|----------|
| 206005_s_at  | 22832  | <i>KIAA1009</i>      | 9.52e-04 |
| 213086_s_at  | 1452   | <i>CSNK1A1</i>       | 9.53e-04 |
| 235164_at    | 219749 | <i>ZNF25</i>         | 9.57e-04 |
| 200050_at    | 7705   | <i>ZNF146</i>        | 9.59e-04 |
| 235547_at    | 10443  | <i>N4BP2L2</i>       | 9.59e-04 |
| 243316_x_at  | 9559   | <i>VPS26A</i>        | 9.60e-04 |
| 229466_at    | 9866   | <i>TRIM66</i>        | 9.60e-04 |
| 215424_s_at  | 22938  | <i>SNW1</i>          | 9.60e-04 |
| 212984_at    | 1386   | <i>ATF2</i>          | 9.62e-04 |
| 228851_s_at  | 2029   | <i>ENSA</i>          | 9.62e-04 |
| 224568_x_at  | 378938 | <i>MALAT1</i>        | 9.62e-04 |
| 218449_at    | 55325  | <i>UFSP2</i>         | 9.64e-04 |
| 209216_at    | 11152  | <i>WDR45</i>         | 9.70e-04 |
| 1558028_x_at | 647979 | <i>LINC00657</i>     | 9.72e-04 |
| 243463_s_at  | 6016   | <i>RIT1</i>          | 9.76e-04 |
| 202001_s_at  | 4700   | <i>NDUFA6</i>        | 9.77e-04 |
| 202577_s_at  | 55308  | <i>DDX19A</i>        | 9.77e-04 |
| 204091_at    | 5147   | <i>PDE6D</i>         | 9.80e-04 |
| 222244_s_at  | 55000  | <i>TUG1</i>          | 9.80e-04 |
| 209090_s_at  | 51100  | <i>SH3GLB1</i>       | 9.82e-04 |
| 242550_at    | 8662   | <i>EIF3B</i>         | 9.83e-04 |
| 205077_s_at  | 5281   | <i>PIGF</i>          | 9.85e-04 |
| 222668_at    | 79047  | <i>KCTD15</i>        | 9.85e-04 |
| 223059_s_at  | 83641  | <i>FAM107B</i>       | 9.86e-04 |
| 231730_at    | 51091  | <i>SEPSECS</i>       | 9.87e-04 |
| 1553167_a_at | 51091  | <i>SEPSECS</i>       | 9.90e-04 |
| 208975_s_at  | 3837   | <i>KPNB1</i>         | 9.91e-04 |
| 207078_at    | 10001  | <i>MED6</i>          | 9.92e-04 |
| 225338_at    | 79699  | <i>ZYG11B</i>        | 9.92e-04 |
| 225969_at    | 84964  | <i>ALKBH6</i>        | 9.93e-04 |
| 57516_at     | 92595  | <i>ZNF764</i>        | 9.95e-04 |
| 211059_s_at  | 2801   | <i>GOLGA2</i>        | 9.96e-04 |
| 205809_s_at  | 8976   | <i>WASL</i>          | 9.96e-04 |
| 218447_at    | 56942  | <i>CMC2</i>          | 9.96e-04 |
| 201682_at    | 9512   | <i>PMPCB</i>         | 9.98e-04 |
| 226732_at    | 155435 | <i>RBM33</i>         | 9.98e-04 |
| 202717_s_at  | 8881   | <i>CDC16</i>         | 1.00e-03 |
| 233056_x_at  | 22839  | <i>DLGAP4</i>        | 1.00e-03 |
| 241985_at    | 133746 | <i>JMY</i>           | 1.00e-03 |
| 213546_at    | 222161 | <i>DKFZP586I1420</i> | 1.00e-03 |

|              |        |                  |          |
|--------------|--------|------------------|----------|
| 202405_at    | 7073   | <i>TIAL1</i>     | 1.01e-03 |
| 200042_at    | 51493  | <i>C22orf28</i>  | 1.01e-03 |
| 228341_at    | 131870 | <i>NUDT16</i>    | 1.01e-03 |
| 228961_at    | 166968 | <i>MIER3</i>     | 1.01e-03 |
| 215600_x_at  | 285231 | <i>FBXW12</i>    | 1.01e-03 |
| 236007_at    | 11216  | <i>AKAP10</i>    | 1.02e-03 |
| 201855_s_at  | 23300  | <i>ATMIN</i>     | 1.02e-03 |
| 201857_at    | 51663  | <i>ZFR</i>       | 1.02e-03 |
| 223380_s_at  | 26524  | <i>LATS2</i>     | 1.03e-03 |
| 218135_at    | 51290  | <i>ERGIC2</i>    | 1.03e-03 |
| 218134_s_at  | 55696  | <i>RBM22</i>     | 1.03e-03 |
| 1556064_at   | 284926 | <i>LOC284926</i> | 1.03e-03 |
| 239106_at    | 340591 | <i>CA5BP1</i>    | 1.03e-03 |
| 1557736_at   | 4820   | <i>NKTR</i>      | 1.04e-03 |
| 216983_s_at  | 7767   | <i>ZNF224</i>    | 1.04e-03 |
| 228374_at    | 27291  | <i>R3HCC1L</i>   | 1.04e-03 |
| 218571_s_at  | 29082  | <i>CHMP4A</i>    | 1.04e-03 |
| 232652_x_at  | 51282  | <i>SCAND1</i>    | 1.04e-03 |
| 219119_at    | 51691  | <i>NAA38</i>     | 1.04e-03 |
| 227062_at    | 283131 | <i>NEAT1</i>     | 1.04e-03 |
| 226808_at    | 643641 | <i>ZNF862</i>    | 1.04e-03 |
| 223424_s_at  | 7589   | <i>ZSCAN21</i>   | 1.05e-03 |
| 231809_x_at  | 10081  | <i>PDCD7</i>     | 1.05e-03 |
| 214662_at    | 23160  | <i>WDR43</i>     | 1.05e-03 |
| 212693_at    | 23195  | <i>MDN1</i>      | 1.05e-03 |
| 224160_s_at  | 28976  | <i>ACAD9</i>     | 1.05e-03 |
| 238465_at    | 133383 | <i>SETD9</i>     | 1.05e-03 |
| 213896_x_at  | 317662 | <i>FAM149B1</i>  | 1.05e-03 |
| 202678_at    | 2958   | <i>GTF2A2</i>    | 1.06e-03 |
| 202379_s_at  | 4820   | <i>NKTR</i>      | 1.06e-03 |
| 239750_x_at  | 9218   | <i>VAPA</i>      | 1.06e-03 |
| 201987_at    | 9969   | <i>MED13</i>     | 1.06e-03 |
| 231770_x_at  | 51057  | <i>WDPCP</i>     | 1.06e-03 |
| 218166_s_at  | 51773  | <i>RSF1</i>      | 1.06e-03 |
| 1552323_s_at | 159091 | <i>FAM122C</i>   | 1.06e-03 |
| 201520_s_at  | 2926   | <i>GRSF1</i>     | 1.07e-03 |
| 201587_s_at  | 3654   | <i>IRAK1</i>     | 1.07e-03 |
| 218160_at    | 4702   | <i>NDUFA8</i>    | 1.07e-03 |
| 217846_at    | 5859   | <i>QARS</i>      | 1.07e-03 |
| 221830_at    | 5911   | <i>RAP2A</i>     | 1.07e-03 |

|             |           |              |          |
|-------------|-----------|--------------|----------|
| 228711_at   | 7587      | ZNF37A       | 1.07e-03 |
| 212468_at   | 9043      | SPAG9        | 1.07e-03 |
| 209137_s_at | 9100      | USP10        | 1.07e-03 |
| 202462_s_at | 9879      | DDX46        | 1.07e-03 |
| 213019_at   | 26953     | RANBP6       | 1.07e-03 |
| 239083_at   | 136051    | ZNF786       | 1.07e-03 |
| 226502_at   | 255520    | ELMOD2       | 1.07e-03 |
| 224963_at   | 1836      | SLC26A2      | 1.08e-03 |
| 203465_at   | 9801      | MRPL19       | 1.08e-03 |
| 214672_at   | 23093     | TTLL5        | 1.08e-03 |
| 239487_at   | 25940     | FAM98A       | 1.08e-03 |
| 219515_at   | 56980     | PRDM10       | 1.08e-03 |
| 232013_at   | 375748    | ERCC6L2      | 1.08e-03 |
| 226137_at   | 463       | ZFHX3        | 1.09e-03 |
| 213136_at   | 5771      | PTPN2        | 1.09e-03 |
| 203732_at   | 9325      | TRIP4        | 1.09e-03 |
| 212802_s_at | 26130     | GAPVD1       | 1.09e-03 |
| 228145_s_at | 57541     | ZNF398       | 1.09e-03 |
| 205964_at   | 79088     | ZNF426       | 1.09e-03 |
| 226265_at   | 79832     | QSER1        | 1.09e-03 |
| 220301_at   | 79839     | CCDC102B     | 1.09e-03 |
| 207618_s_at | 617       | BCS1L        | 1.10e-03 |
| 217618_x_at | 3364      | HUS1         | 1.10e-03 |
| 235927_at   | 7514      | XPO1         | 1.10e-03 |
| 201592_at   | 8667      | EIF3H        | 1.10e-03 |
| 1554171_at  | 9203      | ZMYM3        | 1.10e-03 |
| 226801_s_at | 64853     | AIDA         | 1.10e-03 |
| 214714_at   | 84124     | ZNF394       | 1.10e-03 |
| 226779_at   | 92255     | LMBRD2       | 1.10e-03 |
| 226126_at   | 93627     | TBCK         | 1.10e-03 |
| 228764_s_at | 145553    | MDP1         | 1.10e-03 |
| 225550_at   | 163882    | CNST         | 1.10e-03 |
| 228866_at   | 100507918 | LOC100507918 | 1.10e-03 |
| 209225_x_at | 3842      | TNPO1        | 1.11e-03 |
| 202582_s_at | 10048     | RANBP9       | 1.11e-03 |
| 215017_s_at | 54874     | FBNP1L       | 1.11e-03 |
| 221820_s_at | 84148     | KAT8         | 1.11e-03 |
| 215978_x_at | 170960    | ZNF721       | 1.11e-03 |
| 1560201_at  | 349075    | ZNF713       | 1.11e-03 |
| 206853_s_at | 6885      | MAP3K7       | 1.12e-03 |

|              |        |                 |          |
|--------------|--------|-----------------|----------|
| 203690_at    | 10426  | <i>TUBGCP3</i>  | 1.12e-03 |
| 223416_at    | 51639  | <i>SF3B14</i>   | 1.12e-03 |
| 221780_s_at  | 55661  | <i>DDX27</i>    | 1.12e-03 |
| 222516_at    | 26985  | <i>AP3M1</i>    | 1.13e-03 |
| 229885_at    | 51773  | <i>RSF1</i>     | 1.13e-03 |
| 1554132_a_at | 54462  | <i>FAM190B</i>  | 1.13e-03 |
| 218862_at    | 79754  | <i>ASB13</i>    | 1.13e-03 |
| 225565_at    | 1385   | <i>CREB1</i>    | 1.14e-03 |
| 200880_at    | 3301   | <i>DNAJA1</i>   | 1.14e-03 |
| 219822_at    | 9617   | <i>MTRF1</i>    | 1.14e-03 |
| 202496_at    | 23644  | <i>EDC4</i>     | 1.14e-03 |
| 218194_at    | 25996  | <i>REXO2</i>    | 1.14e-03 |
| 232489_at    | 54482  | <i>TRMT13</i>   | 1.14e-03 |
| 213526_s_at  | 55957  | <i>LIN37</i>    | 1.14e-03 |
| 219136_s_at  | 64788  | <i>LMF1</i>     | 1.14e-03 |
| 218940_at    | 79609  | <i>METTL21D</i> | 1.14e-03 |
| 201445_at    | 1266   | <i>CNN3</i>     | 1.15e-03 |
| 212980_at    | 9736   | <i>USP34</i>    | 1.15e-03 |
| 226934_at    | 11052  | <i>CPSF6</i>    | 1.15e-03 |
| 225281_at    | 25871  | <i>C3orf17</i>  | 1.15e-03 |
| 231825_x_at  | 55729  | <i>ATF7IP</i>   | 1.15e-03 |
| 202412_s_at  | 7398   | <i>USP1</i>     | 1.16e-03 |
| 243608_at    | 22796  | <i>COG2</i>     | 1.16e-03 |
| 210268_at    | 4799   | <i>NFX1</i>     | 1.17e-03 |
| 218583_s_at  | 54165  | <i>DCUN1D1</i>  | 1.17e-03 |
| 232902_s_at  | 57038  | <i>RARS2</i>    | 1.17e-03 |
| 226153_s_at  | 246175 | <i>CNOT6L</i>   | 1.17e-03 |
| 202056_at    | 3836   | <i>KPNA1</i>    | 1.18e-03 |
| 214056_at    | 4170   | <i>MCL1</i>     | 1.18e-03 |
| 210694_s_at  | 4281   | <i>MID1</i>     | 1.18e-03 |
| 226015_at    | 7559   | <i>ZNF12</i>    | 1.18e-03 |
| 32062_at     | 9684   | <i>LRRC14</i>   | 1.18e-03 |
| 232063_x_at  | 10056  | <i>FARSB</i>    | 1.18e-03 |
| 217883_at    | 27249  | <i>MMADHC</i>   | 1.18e-03 |
| 220761_s_at  | 51347  | <i>TAOK3</i>    | 1.18e-03 |
| 209486_at    | 57050  | <i>UTP3</i>     | 1.18e-03 |
| 204525_at    | 9678   | <i>PHF14</i>    | 1.19e-03 |
| 205573_s_at  | 51375  | <i>SNX7</i>     | 1.19e-03 |
| 228345_at    | 53344  | <i>CHIC1</i>    | 1.19e-03 |
| 219286_s_at  | 64783  | <i>RBM15</i>    | 1.19e-03 |

|             |        |                 |          |
|-------------|--------|-----------------|----------|
| 202353_s_at | 5718   | <i>PSMD12</i>   | 1.20e-03 |
| 213400_s_at | 6907   | <i>TBL1X</i>    | 1.20e-03 |
| 210251_s_at | 22902  | <i>RUFY3</i>    | 1.20e-03 |
| 243927_x_at | 25962  | <i>KIAA1429</i> | 1.20e-03 |
| 227813_at   | 152815 | <i>THAP6</i>    | 1.20e-03 |
| 208778_s_at | 6950   | <i>TCP1</i>     | 1.21e-03 |
| 212604_at   | 10240  | <i>MRPS31</i>   | 1.21e-03 |
| 213940_s_at | 23048  | <i>FNBP1</i>    | 1.21e-03 |
| 237180_at   | 23198  | <i>PSME4</i>    | 1.21e-03 |
| 202121_s_at | 27243  | <i>CHMP2A</i>   | 1.21e-03 |
| 222906_at   | 28982  | <i>FLVCR1</i>   | 1.21e-03 |
| 218518_at   | 51306  | <i>FAM13B</i>   | 1.21e-03 |
| 212529_at   | 124801 | <i>LSM12</i>    | 1.21e-03 |
| 231234_at   | 1075   | <i>CTSC</i>     | 1.22e-03 |
| 200066_at   | 3550   | <i>IK</i>       | 1.22e-03 |
| 214047_s_at | 8930   | <i>MBD4</i>     | 1.22e-03 |
| 203738_at   | 55322  | <i>C5orf22</i>  | 1.22e-03 |
| 218535_s_at | 55781  | <i>RIOK2</i>    | 1.22e-03 |
| 228953_at   | 123720 | <i>WHAMM</i>    | 1.22e-03 |
| 200779_at   | 468    | <i>ATF4</i>     | 1.23e-03 |
| 201183_s_at | 1108   | <i>CHD4</i>     | 1.23e-03 |
| 212753_at   | 10336  | <i>PCGF3</i>    | 1.23e-03 |
| 203255_at   | 80204  | <i>FBXO11</i>   | 1.23e-03 |
| 203138_at   | 8520   | <i>HAT1</i>     | 1.24e-03 |
| 201098_at   | 9276   | <i>COPB2</i>    | 1.24e-03 |
| 217990_at   | 51292  | <i>GMPR2</i>    | 1.24e-03 |
| 222230_s_at | 55860  | <i>ACTR10</i>   | 1.24e-03 |
| 225296_at   | 57693  | <i>ZNF317</i>   | 1.24e-03 |
| 212129_at   | 81614  | <i>NIPA2</i>    | 1.24e-03 |
| 226011_at   | 151903 | <i>CCDC12</i>   | 1.24e-03 |
| 226194_at   | 283489 | <i>CHAMP1</i>   | 1.24e-03 |
| 222182_s_at | 4848   | <i>CNOT2</i>    | 1.25e-03 |
| 36545_s_at  | 9814   | <i>SFII</i>     | 1.25e-03 |
| 218716_x_at | 25821  | <i>MTO1</i>     | 1.25e-03 |
| 207483_s_at | 55832  | <i>CAND1</i>    | 1.25e-03 |
| 222837_s_at | 80155  | <i>NAA15</i>    | 1.25e-03 |
| 235879_at   | 4154   | <i>MBNL1</i>    | 1.26e-03 |
| 235374_at   | 4190   | <i>MDH1</i>     | 1.26e-03 |
| 234762_x_at | 57486  | <i>NLN</i>      | 1.26e-03 |
| 230000_at   | 57674  | <i>RNF213</i>   | 1.26e-03 |



|              |           |                     |          |
|--------------|-----------|---------------------|----------|
| 236022_at    | 80179     | <i>MYO19</i>        | 1.26e-03 |
| 225920_at    | 148413    | <i>LOC148413</i>    | 1.26e-03 |
| 238303_at    | 201595    | <i>STT3B</i>        | 1.26e-03 |
| 1565651_at   | 375       | <i>ARF1</i>         | 1.27e-03 |
| 221503_s_at  | 3839      | <i>KPNA3</i>        | 1.27e-03 |
| 217864_s_at  | 8554      | <i>PIAS1</i>        | 1.27e-03 |
| 226259_at    | 54536     | <i>EXOC6</i>        | 1.27e-03 |
| 1553909_x_at | 55719     | <i>FAM178A</i>      | 1.27e-03 |
| 235133_at    | 79683     | <i>ZDHHC14</i>      | 1.27e-03 |
| 1561676_at   | 100874243 | <i>PRICKLE2-AS3</i> | 1.27e-03 |
| 235213_at    | 3707      | <i>ITPKB</i>        | 1.28e-03 |
| 209748_at    | 6683      | <i>SPAST</i>        | 1.28e-03 |
| 224129_s_at  | 84661     | <i>DPY30</i>        | 1.28e-03 |
| 213031_s_at  | 84942     | <i>WDR73</i>        | 1.28e-03 |
| 243963_at    | 10806     | <i>SDCCAG8</i>      | 1.29e-03 |
| 213554_s_at  | 55573     | <i>CDV3</i>         | 1.29e-03 |
| 229433_at    | 64062     | <i>RBM26</i>        | 1.29e-03 |
| 238436_s_at  | 390980    | <i>ZNF805</i>       | 1.29e-03 |
| 203447_at    | 5711      | <i>PSMD5</i>        | 1.30e-03 |
| 209106_at    | 8648      | <i>NCOA1</i>        | 1.30e-03 |
| 222158_s_at  | 51029     | <i>DESI2</i>        | 1.30e-03 |
| 217868_s_at  | 51108     | <i>METTL9</i>       | 1.30e-03 |
| 232209_x_at  | 81502     | <i>HM13</i>         | 1.30e-03 |
| 219292_at    | 55145     | <i>THAP1</i>        | 1.31e-03 |
| 225534_at    | 114926    | <i>C8orf40</i>      | 1.31e-03 |
| 204219_s_at  | 5700      | <i>PSMC1</i>        | 1.32e-03 |
| 214375_at    | 8496      | <i>PPFIBP1</i>      | 1.32e-03 |
| 218603_at    | 51696     | <i>HECA</i>         | 1.32e-03 |
| 55093_at     | 54480     | <i>CHPF2</i>        | 1.32e-03 |
| 1555411_a_at | 57018     | <i>CCNLI</i>        | 1.32e-03 |
| 225068_at    | 59349     | <i>KLHL12</i>       | 1.32e-03 |
| 226449_at    | 153241    | <i>CEP120</i>       | 1.32e-03 |
| 201824_at    | 9604      | <i>RNF14</i>        | 1.33e-03 |
| 208970_s_at  | 7389      | <i>UROD</i>         | 1.34e-03 |
| 213165_at    | 9857      | <i>CEP350</i>       | 1.34e-03 |
| 220368_s_at  | 55671     | <i>SMEK1</i>        | 1.34e-03 |
| 223480_s_at  | 57129     | <i>MRPL47</i>       | 1.34e-03 |
| 213067_at    | 4628      | <i>MYH10</i>        | 1.35e-03 |
| 226151_x_at  | 9946      | <i>CRYZLI</i>       | 1.35e-03 |
| 214052_x_at  | 23215     | <i>PRRC2C</i>       | 1.35e-03 |

|             |        |                 |          |
|-------------|--------|-----------------|----------|
| 233559_s_at | 57590  | <i>WDFY1</i>    | 1.35e-03 |
| 218740_s_at | 80279  | <i>CDK5RAP3</i> | 1.35e-03 |
| 222264_at   | 221092 | <i>HNRNPUL2</i> | 1.35e-03 |
| 200692_s_at | 3313   | <i>HSPA9</i>    | 1.36e-03 |
| 200829_x_at | 7756   | <i>ZNF207</i>   | 1.36e-03 |
| 218503_at   | 54914  | <i>FOCAD</i>    | 1.36e-03 |
| 222200_s_at | 55108  | <i>BSDC1</i>    | 1.36e-03 |
| 225110_at   | 55239  | <i>OGFOD1</i>   | 1.36e-03 |
| 239771_at   | 55832  | <i>CAND1</i>    | 1.36e-03 |
| 226922_at   | 5903   | <i>RANBP2</i>   | 1.37e-03 |
| 203181_x_at | 6733   | <i>SRPK2</i>    | 1.37e-03 |
| 212652_s_at | 8723   | <i>SNX4</i>     | 1.37e-03 |
| 224654_at   | 9188   | <i>DDX21</i>    | 1.37e-03 |
| 232864_s_at | 27125  | <i>AFF4</i>     | 1.37e-03 |
| 221774_x_at | 55578  | <i>FAM48A</i>   | 1.37e-03 |
| 218204_s_at | 79443  | <i>FYCO1</i>    | 1.37e-03 |
| 244443_at   | 1106   | <i>CHD2</i>     | 1.38e-03 |
| 244515_at   | 5713   | <i>PSMD7</i>    | 1.38e-03 |
| 201344_at   | 7322   | <i>UBE2D2</i>   | 1.38e-03 |
| 38703_at    | 23549  | <i>DNPEP</i>    | 1.38e-03 |
| 201856_s_at | 51663  | <i>ZFR</i>      | 1.38e-03 |
| 213015_at   | 56987  | <i>BBX</i>      | 1.38e-03 |
| 200089_s_at | 6124   | <i>RPL4</i>     | 1.39e-03 |
| 201447_at   | 7072   | <i>TIA1</i>     | 1.39e-03 |
| 204391_x_at | 8805   | <i>TRIM24</i>   | 1.39e-03 |
| 224971_at   | 51263  | <i>MRPL30</i>   | 1.39e-03 |
| 41329_at    | 57147  | <i>SCYL3</i>    | 1.39e-03 |
| 222311_s_at | 57466  | <i>SCAF4</i>    | 1.39e-03 |
| 213728_at   | 3916   | <i>LAMP1</i>    | 1.40e-03 |
| 213511_s_at | 8776   | <i>MTMR1</i>    | 1.40e-03 |
| 209579_s_at | 8930   | <i>MBD4</i>     | 1.40e-03 |
| 1557759_at  | 55101  | <i>ATP5SL</i>   | 1.40e-03 |
| 220840_s_at | 55732  | <i>C1orf112</i> | 1.40e-03 |
| 242887_at   | 56888  | <i>KCMF1</i>    | 1.40e-03 |
| 226352_at   | 133746 | <i>JMY</i>      | 1.40e-03 |
| 242294_at   | 200933 | <i>FBXO45</i>   | 1.40e-03 |
| 242903_at   | 3459   | <i>IFNGR1</i>   | 1.41e-03 |
| 228284_at   | 7088   | <i>TLE1</i>     | 1.41e-03 |
| 222585_x_at | 51315  | <i>KRCCI</i>    | 1.41e-03 |
| 213366_x_at | 509    | <i>ATP5C1</i>   | 1.42e-03 |

|              |        |                  |          |
|--------------|--------|------------------|----------|
| 226084_at    | 4131   | <i>MAP1B</i>     | 1.42e-03 |
| 242297_at    | 6239   | <i>RREB1</i>     | 1.43e-03 |
| 209724_s_at  | 7541   | <i>ZFP161</i>    | 1.43e-03 |
| 219297_at    | 54521  | <i>WDR44</i>     | 1.43e-03 |
| 225643_at    | 93487  | <i>MAPK1IP1L</i> | 1.43e-03 |
| 226642_s_at  | 134492 | <i>NUDCD2</i>    | 1.43e-03 |
| 243709_at    | 153129 | <i>SLC38A9</i>   | 1.43e-03 |
| 202132_at    | 25937  | <i>WWTR1</i>     | 1.44e-03 |
| 211930_at    | 220988 | <i>HNRNPA3</i>   | 1.44e-03 |
| 228970_at    | 339487 | <i>ZBTB8OS</i>   | 1.44e-03 |
| 236754_at    | 5504   | <i>PPP1R2</i>    | 1.45e-03 |
| 229220_x_at  | 64434  | <i>NOM1</i>      | 1.45e-03 |
| 224934_at    | 81555  | <i>YIPF5</i>     | 1.45e-03 |
| 1566509_s_at | 26268  | <i>FBXO9</i>     | 1.46e-03 |
| 228713_s_at  | 51171  | <i>HSD17B14</i>  | 1.46e-03 |
| 233893_s_at  | 57654  | <i>UVSSA</i>     | 1.46e-03 |
| 1559893_at   | 253635 | <i>CCDC75</i>    | 1.46e-03 |
| 225430_at    | 283459 | <i>GATC</i>      | 1.46e-03 |
| 200073_s_at  | 3184   | <i>HNRNPD</i>    | 1.47e-03 |
| 225120_at    | 5814   | <i>PURB</i>      | 1.47e-03 |
| 202829_s_at  | 6845   | <i>VAMP7</i>     | 1.47e-03 |
| 205526_s_at  | 11104  | <i>KATNA1</i>    | 1.47e-03 |
| 220183_s_at  | 11162  | <i>NUDT6</i>     | 1.47e-03 |
| 243985_at    | 2958   | <i>GTF2A2</i>    | 1.48e-03 |
| 33760_at     | 5195   | <i>PEX14</i>     | 1.48e-03 |
| 212301_at    | 23168  | <i>RTF1</i>      | 1.48e-03 |
| 223287_s_at  | 27086  | <i>FOXP1</i>     | 1.48e-03 |
| 223908_at    | 55869  | <i>HDAC8</i>     | 1.48e-03 |
| 226321_at    | 116068 | <i>LYSMD3</i>    | 1.48e-03 |
| 201345_s_at  | 7322   | <i>UBE2D2</i>    | 1.49e-03 |
| 219177_at    | 55299  | <i>BRIX1</i>     | 1.49e-03 |
| 217917_s_at  | 83658  | <i>DYNLRB1</i>   | 1.49e-03 |
| 213049_at    | 253959 | <i>RALGAPA1</i>  | 1.49e-03 |
| 244168_s_at  | 54986  | <i>ULK4</i>      | 1.50e-03 |
| 218093_s_at  | 55608  | <i>ANKRD10</i>   | 1.50e-03 |
| 209095_at    | 1738   | <i>DLD</i>       | 1.51e-03 |
| 202082_s_at  | 6397   | <i>SEC14L1</i>   | 1.51e-03 |
| 242477_at    | 158219 | <i>TTC39B</i>    | 1.51e-03 |
| 218645_at    | 11179  | <i>ZNF277</i>    | 1.52e-03 |
| 201948_at    | 29889  | <i>GNL2</i>      | 1.52e-03 |

|              |        |                  |          |
|--------------|--------|------------------|----------|
| 226343_at    | 54878  | <i>DPP8</i>      | 1.52e-03 |
| 227049_at    | 284273 | <i>ZADH2</i>     | 1.52e-03 |
| 209061_at    | 8202   | <i>NCOA3</i>     | 1.53e-03 |
| 224494_x_at  | 51171  | <i>HSD17B14</i>  | 1.53e-03 |
| 213734_at    | 55884  | <i>WSB2</i>      | 1.53e-03 |
| 227485_at    | 203522 | <i>DDX26B</i>    | 1.53e-03 |
| 210407_at    | 5494   | <i>PPM1A</i>     | 1.54e-03 |
| 201499_s_at  | 7874   | <i>USP7</i>      | 1.54e-03 |
| 212131_at    | 26065  | <i>LSM14A</i>    | 1.54e-03 |
| 202978_s_at  | 58487  | <i>CREBZF</i>    | 1.54e-03 |
| 226196_s_at  | 112752 | <i>IFT43</i>     | 1.54e-03 |
| 204797_s_at  | 2009   | <i>EML1</i>      | 1.55e-03 |
| 207573_x_at  | 10632  | <i>ATP5L</i>     | 1.55e-03 |
| 201153_s_at  | 4154   | <i>MBNL1</i>     | 1.56e-03 |
| 200032_s_at  | 6133   | <i>RPL9</i>      | 1.56e-03 |
| 224718_at    | 7528   | <i>YY1</i>       | 1.56e-03 |
| 215482_s_at  | 8890   | <i>EIF2B4</i>    | 1.56e-03 |
| 214104_at    | 23432  | <i>GPR161</i>    | 1.56e-03 |
| 1566191_at   | 23512  | <i>SUZ12</i>     | 1.56e-03 |
| 222133_s_at  | 51105  | <i>PHF20L1</i>   | 1.56e-03 |
| 231930_at    | 55531  | <i>ELMOD1</i>    | 1.56e-03 |
| 223182_s_at  | 56894  | <i>AGPAT3</i>    | 1.56e-03 |
| 244189_at    | 284900 | <i>TTC28-AS1</i> | 1.56e-03 |
| 211755_s_at  | 515    | <i>ATP5F1</i>    | 1.57e-03 |
| 201134_x_at  | 1350   | <i>COX7C</i>     | 1.57e-03 |
| 205340_at    | 9841   | <i>ZBTB24</i>    | 1.57e-03 |
| 222788_s_at  | 54665  | <i>RSBN1</i>     | 1.57e-03 |
| 218271_s_at  | 55486  | <i>PARL</i>      | 1.57e-03 |
| 200051_at    | 9092   | <i>SART1</i>     | 1.58e-03 |
| 204929_s_at  | 10791  | <i>VAMP5</i>     | 1.58e-03 |
| 221791_s_at  | 51372  | <i>TMA7</i>      | 1.58e-03 |
| 218877_s_at  | 60487  | <i>TRMT11</i>    | 1.58e-03 |
| 211953_s_at  | 3843   | <i>IPO5</i>      | 1.59e-03 |
| 209337_at    | 11168  | <i>PSIP1</i>     | 1.59e-03 |
| 207728_at    | 55729  | <i>ATF7IP</i>    | 1.59e-03 |
| 225626_at    | 55824  | <i>PAG1</i>      | 1.59e-03 |
| 1552628_a_at | 64224  | <i>HERPUD2</i>   | 1.59e-03 |
| 223370_at    | 65977  | <i>PLEKHA3</i>   | 1.59e-03 |
| 212596_s_at  | 10042  | <i>HMGXB4</i>    | 1.60e-03 |
| 243051_at    | 29097  | <i>CNIH4</i>     | 1.60e-03 |

|             |        |                  |          |
|-------------|--------|------------------|----------|
| 226887_at   | 51182  | <i>HSPA14</i>    | 1.60e-03 |
| 238831_at   | 55161  | <i>TMEM33</i>    | 1.60e-03 |
| 213061_s_at | 123803 | <i>NTANI</i>     | 1.60e-03 |
| 213062_at   | 123803 | <i>NTANI</i>     | 1.60e-03 |
| 203714_s_at | 6905   | <i>TBCE</i>      | 1.61e-03 |
| 213238_at   | 57205  | <i>ATP10D</i>    | 1.61e-03 |
| 227101_at   | 168850 | <i>ZNF800</i>    | 1.61e-03 |
| 1558458_at  | 401320 | <i>LOC401320</i> | 1.61e-03 |
| 236402_at   | 673    | <i>BRAF</i>      | 1.62e-03 |
| 204349_at   | 9443   | <i>MED7</i>      | 1.62e-03 |
| 215171_s_at | 10440  | <i>TIMM17A</i>   | 1.62e-03 |
| 200619_at   | 10992  | <i>SF3B2</i>     | 1.62e-03 |
| 217894_at   | 51133  | <i>KCTD3</i>     | 1.62e-03 |
| 242427_at   | 51322  | <i>WAC</i>       | 1.62e-03 |
| 224782_at   | 153527 | <i>ZMAT2</i>     | 1.62e-03 |
| 205062_x_at | 5926   | <i>ARID4A</i>    | 1.63e-03 |
| 203600_s_at | 8603   | <i>FAM193A</i>   | 1.63e-03 |
| 243649_at   | 25793  | <i>FBXO7</i>     | 1.63e-03 |
| 217843_s_at | 29079  | <i>MED4</i>      | 1.63e-03 |
| 225215_s_at | 54516  | <i>MTRF1L</i>    | 1.63e-03 |
| 234929_s_at | 55812  | <i>SPATA7</i>    | 1.63e-03 |
| 226877_at   | 132241 | <i>RPL32P3</i>   | 1.63e-03 |
| 226333_at   | 3570   | <i>IL6R</i>      | 1.64e-03 |
| 225537_at   | 122553 | <i>TRAPPC6B</i>  | 1.64e-03 |
| 226127_at   | 221120 | <i>ALKBH3</i>    | 1.64e-03 |
| 225563_at   | 255967 | <i>PAN3</i>      | 1.64e-03 |
| 200735_x_at | 4666   | <i>NACA</i>      | 1.65e-03 |
| 204937_s_at | 10782  | <i>ZNF274</i>    | 1.65e-03 |
| 228785_at   | 23528  | <i>ZNF281</i>    | 1.65e-03 |
| 224513_s_at | 56893  | <i>UBQLN4</i>    | 1.65e-03 |
| 235812_at   | 255919 | <i>CNEP1R1</i>   | 1.65e-03 |
| 213491_x_at | 6185   | <i>RPN2</i>      | 1.66e-03 |
| 229980_s_at | 27131  | <i>SNX5</i>      | 1.66e-03 |
| 232087_at   | 256643 | <i>CXorf23</i>   | 1.66e-03 |
| 227689_at   | 7770   | <i>ZNF227</i>    | 1.67e-03 |
| 203250_at   | 22828  | <i>SCAF8</i>     | 1.67e-03 |
| 209285_s_at | 23272  | <i>FAM208A</i>   | 1.67e-03 |
| 222684_s_at | 79954  | <i>NOL10</i>     | 1.67e-03 |
| 223248_at   | 83693  | <i>HSDL1</i>     | 1.67e-03 |
| 230972_at   | 122416 | <i>ANKRD9</i>    | 1.67e-03 |

|             |           |                     |          |
|-------------|-----------|---------------------|----------|
| 209056_s_at | 988       | <i>CDC5L</i>        | 1.68e-03 |
| 242248_at   | 5257      | <i>PHKB</i>         | 1.68e-03 |
| 204453_at   | 7637      | <i>ZNF84</i>        | 1.68e-03 |
| 213983_s_at | 23244     | <i>PDS5A</i>        | 1.68e-03 |
| 218803_at   | 55743     | <i>CHFR</i>         | 1.68e-03 |
| 226230_at   | 57223     | <i>SMEK2</i>        | 1.68e-03 |
| 225222_at   | 64645     | <i>HIAT1</i>        | 1.68e-03 |
| 242021_at   | 7494      | <i>XBPI</i>         | 1.69e-03 |
| 201960_s_at | 23077     | <i>MYCBP2</i>       | 1.69e-03 |
| 209020_at   | 51526     | <i>C20orf111</i>    | 1.69e-03 |
| 225814_at   | 54464     | <i>XRN1</i>         | 1.69e-03 |
| 215057_at   | 100272228 | <i>LOC100272228</i> | 1.69e-03 |
| 218563_at   | 4696      | <i>NDUFA3</i>       | 1.70e-03 |
| 223358_s_at | 5150      | <i>PDE7A</i>        | 1.70e-03 |
| 211769_x_at | 10955     | <i>SERINC3</i>      | 1.70e-03 |
| 236696_at   | 23350     | <i>U2SURP</i>       | 1.70e-03 |
| 218483_s_at | 56912     | <i>IFT46</i>        | 1.70e-03 |
| 213365_at   | 112479    | <i>ERI2</i>         | 1.70e-03 |
| 202758_s_at | 8625      | <i>RFXANK</i>       | 1.71e-03 |
| 202798_at   | 10427     | <i>SEC24B</i>       | 1.71e-03 |
| 214009_at   | 10943     | <i>MSL3</i>         | 1.71e-03 |
| 227418_at   | 84437     | <i>MSANTD4</i>      | 1.71e-03 |
| 237291_at   | 344405    | <i>PRORS DIP</i>    | 1.71e-03 |
| 223940_x_at | 378938    | <i>MALAT1</i>       | 1.71e-03 |
| 201007_at   | 3032      | <i>HADHB</i>        | 1.72e-03 |
| 219350_s_at | 56616     | <i>DIABLO</i>       | 1.72e-03 |
| 238787_at   | 163486    | <i>DENND1B</i>      | 1.72e-03 |
| 225463_x_at | 653519    | <i>GPR89A</i>       | 1.72e-03 |
| 210093_s_at | 4116      | <i>MAGOH</i>        | 1.73e-03 |
| 218659_at   | 55252     | <i>ASXL2</i>        | 1.73e-03 |
| 227852_at   | 6100      | <i>RP9</i>          | 1.74e-03 |
| 215611_at   | 6938      | <i>TCF12</i>        | 1.74e-03 |
| 213659_at   | 7626      | <i>ZNF75D</i>       | 1.74e-03 |
| 219244_s_at | 26589     | <i>MRPL46</i>       | 1.74e-03 |
| 217737_x_at | 51507     | <i>C20orf43</i>     | 1.74e-03 |
| 227471_at   | 57531     | <i>HACE1</i>        | 1.74e-03 |
| 202051_s_at | 9202      | <i>ZMYM4</i>        | 1.75e-03 |
| 204176_at   | 27252     | <i>KLHL20</i>       | 1.75e-03 |
| 222310_at   | 57466     | <i>SCAF4</i>        | 1.75e-03 |
| 230747_s_at | 125488    | <i>TTC39C</i>       | 1.75e-03 |

|              |        |                 |          |
|--------------|--------|-----------------|----------|
| 202451_at    | 2965   | <i>GTF2H1</i>   | 1.76e-03 |
| 200771_at    | 3915   | <i>LAMC1</i>    | 1.76e-03 |
| 202413_s_at  | 7398   | <i>USP1</i>     | 1.76e-03 |
| 203916_at    | 8509   | <i>NDST2</i>    | 1.76e-03 |
| 203650_at    | 10544  | <i>PROCR</i>    | 1.76e-03 |
| 213623_at    | 11127  | <i>KIF3A</i>    | 1.76e-03 |
| 210028_s_at  | 23595  | <i>ORC3</i>     | 1.76e-03 |
| 226581_at    | 64145  | <i>ZFYVE20</i>  | 1.76e-03 |
| 226273_at    | 1184   | <i>CLCN5</i>    | 1.77e-03 |
| 212683_at    | 9673   | <i>SLC25A44</i> | 1.77e-03 |
| 210616_s_at  | 22872  | <i>SEC31A</i>   | 1.77e-03 |
| 221776_s_at  | 29117  | <i>BRD7</i>     | 1.77e-03 |
| 1554981_at   | 54586  | <i>C9orf11</i>  | 1.77e-03 |
| 218459_at    | 64222  | <i>TOR3A</i>    | 1.77e-03 |
| 1557176_a_at | 145407 | <i>C14orf37</i> | 1.77e-03 |
| 238077_at    | 200845 | <i>KCTD6</i>    | 1.77e-03 |
| 208635_x_at  | 4666   | <i>NACA</i>     | 1.78e-03 |
| 1557227_s_at | 7175   | <i>TPR</i>      | 1.78e-03 |
| 204000_at    | 10681  | <i>GNB5</i>     | 1.78e-03 |
| 233665_x_at  | 25821  | <i>MTO1</i>     | 1.78e-03 |
| 224914_s_at  | 84324  | <i>SARNP</i>    | 1.78e-03 |
| 215203_at    | 2803   | <i>GOLGA4</i>   | 1.79e-03 |
| 203327_at    | 3416   | <i>IDE</i>      | 1.79e-03 |
| 1552329_at   | 5930   | <i>RBBP6</i>    | 1.79e-03 |
| 202372_at    | 25782  | <i>RAB3GAP2</i> | 1.79e-03 |
| 242389_at    | 51747  | <i>LUC7L3</i>   | 1.79e-03 |
| 223015_at    | 83939  | <i>EIF2A</i>    | 1.79e-03 |
| 218497_s_at  | 246243 | <i>RNASEH1</i>  | 1.79e-03 |
| 202420_s_at  | 1660   | <i>DHX9</i>     | 1.80e-03 |
| 241905_at    | 5286   | <i>PIK3C2A</i>  | 1.80e-03 |
| 227188_at    | 59271  | <i>FAM176C</i>  | 1.80e-03 |
| 223662_x_at  | 83479  | <i>DDX59</i>    | 1.80e-03 |
| 225649_s_at  | 140901 | <i>STK35</i>    | 1.80e-03 |
| 212097_at    | 857    | <i>CAV1</i>     | 1.81e-03 |
| 204840_s_at  | 8411   | <i>EEA1</i>     | 1.81e-03 |
| 231939_s_at  | 55814  | <i>BDP1</i>     | 1.81e-03 |
| 232065_x_at  | 91687  | <i>CENPL</i>    | 1.81e-03 |
| 226939_at    | 132864 | <i>CPEB2</i>    | 1.81e-03 |
| 1558620_at   | 285268 | <i>ZNF621</i>   | 1.81e-03 |
| 201553_s_at  | 3916   | <i>LAMP1</i>    | 1.82e-03 |

|              |        |                 |          |
|--------------|--------|-----------------|----------|
| 203263_s_at  | 23229  | <i>ARHGEF9</i>  | 1.82e-03 |
| 201846_s_at  | 23429  | <i>RYBP</i>     | 1.82e-03 |
| 243519_at    | 9690   | <i>UBE3C</i>    | 1.83e-03 |
| 223650_s_at  | 29982  | <i>NRBF2</i>    | 1.83e-03 |
| 221706_s_at  | 55850  | <i>USE1</i>     | 1.83e-03 |
| 217970_s_at  | 57472  | <i>CNOT6</i>    | 1.83e-03 |
| 202920_at    | 287    | <i>ANK2</i>     | 1.84e-03 |
| 213845_at    | 2898   | <i>GRIK2</i>    | 1.84e-03 |
| 219451_at    | 22921  | <i>MSRB2</i>    | 1.84e-03 |
| 222589_at    | 51701  | <i>NLK</i>      | 1.84e-03 |
| 230270_at    | 55119  | <i>PRPF38B</i>  | 1.84e-03 |
| 232551_at    | 65010  | <i>SLC26A6</i>  | 1.84e-03 |
| 215210_s_at  | 1743   | <i>DLST</i>     | 1.85e-03 |
| 200015_s_at  | 4735   | <i>SEPT2</i>    | 1.85e-03 |
| 201454_s_at  | 9520   | <i>NPEPPS</i>   | 1.85e-03 |
| 239283_at    | 50999  | <i>TMED5</i>    | 1.85e-03 |
| 223294_at    | 51260  | <i>CXorf26</i>  | 1.85e-03 |
| 222629_at    | 51455  | <i>REVI</i>     | 1.85e-03 |
| 225022_at    | 57120  | <i>GOPC</i>     | 1.85e-03 |
| 219029_at    | 64417  | <i>C5orf28</i>  | 1.85e-03 |
| 242864_at    | 115196 | <i>ZNF554</i>   | 1.85e-03 |
| 209330_s_at  | 3184   | <i>HNRNPD</i>   | 1.86e-03 |
| 214306_at    | 4976   | <i>OPA1</i>     | 1.86e-03 |
| 201997_s_at  | 23013  | <i>SPEN</i>     | 1.86e-03 |
| 217953_at    | 23469  | <i>PHF3</i>     | 1.86e-03 |
| 1552644_a_at | 80012  | <i>PHC3</i>     | 1.86e-03 |
| 200691_s_at  | 3313   | <i>HSPA9</i>    | 1.87e-03 |
| 224621_at    | 5594   | <i>MAPK1</i>    | 1.87e-03 |
| 203909_at    | 10479  | <i>SLC9A6</i>   | 1.87e-03 |
| 231899_at    | 85463  | <i>ZC3H12C</i>  | 1.87e-03 |
| 242562_at    | 120526 | <i>DNAJC24</i>  | 1.87e-03 |
| 236487_at    | 132320 | <i>SCLT1</i>    | 1.87e-03 |
| 235810_at    | 7569   | <i>ZNF182</i>   | 1.88e-03 |
| 243361_at    | 140890 | <i>SREK1</i>    | 1.88e-03 |
| 222390_at    | 51322  | <i>WAC</i>      | 1.89e-03 |
| 229632_s_at  | 55174  | <i>INTS10</i>   | 1.89e-03 |
| 1553928_at   | 255520 | <i>ELMOD2</i>   | 1.89e-03 |
| 208152_s_at  | 9188   | <i>DDX21</i>    | 1.90e-03 |
| 209175_at    | 11196  | <i>SEC23IP</i>  | 1.90e-03 |
| 238599_at    | 134728 | <i>IRAK1BP1</i> | 1.90e-03 |



|              |        |                  |          |
|--------------|--------|------------------|----------|
| 211042_x_at  | 4162   | <i>MCAM</i>      | 1.91e-03 |
| 215684_s_at  | 84164  | <i>ASCC2</i>     | 1.91e-03 |
| 201972_at    | 523    | <i>ATP6V1A</i>   | 1.92e-03 |
| 200873_s_at  | 10694  | <i>CCT8</i>      | 1.92e-03 |
| 224873_s_at  | 64432  | <i>MRPS25</i>    | 1.92e-03 |
| 228183_s_at  | 84268  | <i>RPAIN</i>     | 1.92e-03 |
| 207877_s_at  | 4931   | <i>NVL</i>       | 1.93e-03 |
| 209849_s_at  | 5889   | <i>RAD51C</i>    | 1.93e-03 |
| 218562_s_at  | 55219  | <i>TMEM57</i>    | 1.93e-03 |
| 226975_at    | 55599  | <i>RNPC3</i>     | 1.93e-03 |
| 222701_s_at  | 79145  | <i>CHCHD7</i>    | 1.93e-03 |
| 227960_s_at  | 81889  | <i>FAHD1</i>     | 1.93e-03 |
| 1569110_x_at | 728613 | <i>LOC728613</i> | 1.93e-03 |
| 211944_at    | 23215  | <i>PRRC2C</i>    | 1.94e-03 |
| 217878_s_at  | 996    | <i>CDC27</i>     | 1.95e-03 |
| 212078_s_at  | 4297   | <i>MLL</i>       | 1.95e-03 |
| 204788_s_at  | 5498   | <i>PPOX</i>      | 1.95e-03 |
| 202244_at    | 5692   | <i>PSMB4</i>     | 1.95e-03 |
| 1560029_a_at | 55216  | <i>C11orf57</i>  | 1.95e-03 |
| 217853_at    | 64759  | <i>TNS3</i>      | 1.95e-03 |
| 225971_at    | 80821  | <i>DDHD1</i>     | 1.95e-03 |
| 244110_at    | 4297   | <i>MLL</i>       | 1.96e-03 |
| 222479_s_at  | 51143  | <i>DYNC1L1I</i>  | 1.96e-03 |
| 217898_at    | 56851  | <i>EMC7</i>      | 1.96e-03 |
| 230243_at    | 93587  | <i>TRMT10A</i>   | 1.96e-03 |
| 237725_x_at  | 23137  | <i>SMC5</i>      | 1.97e-03 |
| 242433_at    | 27107  | <i>ZBTB11</i>    | 1.97e-03 |
| 228502_at    | 27330  | <i>RPS6KA6</i>   | 1.97e-03 |
| 239355_at    | 64395  | <i>GMCL1</i>     | 1.97e-03 |
| 55662_at     | 79591  | <i>C10orf76</i>  | 1.97e-03 |
| 218457_s_at  | 1788   | <i>DNMT3A</i>    | 1.98e-03 |
| 213507_s_at  | 3837   | <i>KPNB1</i>     | 1.98e-03 |
| 218070_s_at  | 29926  | <i>GMPPA</i>     | 1.98e-03 |
| 224768_at    | 55677  | <i>IWS1</i>      | 1.98e-03 |
| 218270_at    | 79590  | <i>MRPL24</i>    | 1.98e-03 |
| 211316_x_at  | 8837   | <i>CFLAR</i>     | 1.99e-03 |
| 222427_s_at  | 51520  | <i>LARS</i>      | 1.99e-03 |
| 235787_at    | 55664  | <i>CDC37L1</i>   | 1.99e-03 |
| 228515_at    | 90784  | <i>LOC90784</i>  | 1.99e-03 |
| 223808_s_at  | 114971 | <i>PTPMT1</i>    | 1.99e-03 |

|             |        |                  |          |
|-------------|--------|------------------|----------|
| 1558794_at  | 728190 | <i>LOC728190</i> | 1.99e-03 |
| 1558501_at  | 26052  | <i>DNM3</i>      | 2.00e-03 |
| 223068_at   | 27436  | <i>EML4</i>      | 2.00e-03 |
| 222708_s_at | 55014  | <i>STX17</i>     | 2.00e-03 |
| 219166_at   | 55172  | <i>DNAAF2</i>    | 2.00e-03 |
| 213501_at   | 51     | <i>ACOX1</i>     | 2.01e-03 |
| 217951_s_at | 23469  | <i>PHF3</i>      | 2.01e-03 |
| 214496_x_at | 23522  | <i>KAT6B</i>     | 2.01e-03 |
| 219504_s_at | 79871  | <i>RPAP2</i>     | 2.01e-03 |
| 226323_at   | 91603  | <i>ZNF830</i>    | 2.01e-03 |
| 203531_at   | 8065   | <i>CUL5</i>      | 2.02e-03 |
| 218090_s_at | 55717  | <i>WDR11</i>     | 2.02e-03 |
| 221559_s_at | 79003  | <i>MIS12</i>     | 2.02e-03 |
| 217913_at   | 27183  | <i>VPS4A</i>     | 2.03e-03 |
| 227980_at   | 79692  | <i>ZNF322</i>    | 2.03e-03 |
| 204523_at   | 7699   | <i>ZNF140</i>    | 2.04e-03 |
| 231896_s_at | 8562   | <i>DENR</i>      | 2.04e-03 |
| 204894_s_at | 8639   | <i>AOC3</i>      | 2.04e-03 |
| 201965_s_at | 23064  | <i>SETX</i>      | 2.04e-03 |
| 212310_at   | 375056 | <i>MIA3</i>      | 2.04e-03 |
| 222104_x_at | 2967   | <i>GTF2H3</i>    | 2.05e-03 |
| 233025_at   | 23037  | <i>PDZD2</i>     | 2.05e-03 |
| 212926_at   | 23137  | <i>SMC5</i>      | 2.05e-03 |
| 228332_s_at | 280636 | <i>C11orf31</i>  | 2.05e-03 |
| 219288_at   | 57415  | <i>C3orf14</i>   | 2.06e-03 |
| 224683_at   | 84893  | <i>FBXO18</i>    | 2.06e-03 |
| 231844_at   | 157247 | <i>MGC27345</i>  | 2.06e-03 |
| 204295_at   | 6834   | <i>SURF1</i>     | 2.07e-03 |
| 65472_at    | 388969 | <i>C2orf68</i>   | 2.07e-03 |
| 213419_at   | 323    | <i>APBB2</i>     | 2.08e-03 |
| 212540_at   | 997    | <i>CDC34</i>     | 2.08e-03 |
| 222623_s_at | 51193  | <i>ZNF639</i>    | 2.08e-03 |
| 209219_at   | 7936   | <i>RDBP</i>      | 2.09e-03 |
| 229344_x_at | 57494  | <i>RIMKLB</i>    | 2.09e-03 |
| 219163_at   | 54811  | <i>ZNF562</i>    | 2.10e-03 |
| 223189_x_at | 55904  | <i>MLL5</i>      | 2.10e-03 |
| 223439_at   | 79576  | <i>NKAP</i>      | 2.10e-03 |
| 223267_at   | 54931  | <i>TRMT10C</i>   | 2.11e-03 |
| 203590_at   | 1783   | <i>DYNC1LI2</i>  | 2.12e-03 |
| 227510_x_at | 378938 | <i>MALAT1</i>    | 2.12e-03 |

|              |        |                   |          |
|--------------|--------|-------------------|----------|
| 213993_at    | 10418  | <i>SPON1</i>      | 2.13e-03 |
| 201608_s_at  | 11137  | <i>PWP1</i>       | 2.13e-03 |
| 228184_at    | 84976  | <i>DISP1</i>      | 2.13e-03 |
| 201441_at    | 1340   | <i>COX6B1</i>     | 2.14e-03 |
| 209433_s_at  | 5471   | <i>PPAT</i>       | 2.14e-03 |
| 213027_at    | 6738   | <i>TROVE2</i>     | 2.14e-03 |
| 201449_at    | 7072   | <i>TIA1</i>       | 2.14e-03 |
| 229642_at    | 8874   | <i>ARHGEF7</i>    | 2.14e-03 |
| 225455_at    | 117143 | <i>TADA1</i>      | 2.14e-03 |
| 212918_at    | 5965   | <i>RECQL</i>      | 2.15e-03 |
| 210379_s_at  | 9874   | <i>TLK1</i>       | 2.15e-03 |
| 203301_s_at  | 9988   | <i>DMTF1</i>      | 2.15e-03 |
| 243295_at    | 54439  | <i>RBM27</i>      | 2.15e-03 |
| 227931_at    | 54891  | <i>INO80D</i>     | 2.15e-03 |
| 232371_at    | 64844  | <i>MARCH7</i>     | 2.15e-03 |
| 220933_s_at  | 79670  | <i>ZCCHC6</i>     | 2.15e-03 |
| 1565717_s_at | 2521   | <i>FUS</i>        | 2.16e-03 |
| 202077_at    | 4706   | <i>NDUFAB1</i>    | 2.16e-03 |
| 226209_at    | 4731   | <i>NDUFV3</i>     | 2.16e-03 |
| 212513_s_at  | 23032  | <i>USP33</i>      | 2.16e-03 |
| 225724_at    | 379025 | <i>FLJ31306</i>   | 2.16e-03 |
| 238432_at    | 649446 | <i>DLGAP1-AS1</i> | 2.16e-03 |
| 231370_at    | 5494   | <i>PPM1A</i>      | 2.17e-03 |
| 210460_s_at  | 5710   | <i>PSMD4</i>      | 2.17e-03 |
| 203594_at    | 8634   | <i>RTCA</i>       | 2.17e-03 |
| 204324_s_at  | 27333  | <i>GOLIM4</i>     | 2.17e-03 |
| 208424_s_at  | 57019  | <i>CIAPIN1</i>    | 2.17e-03 |
| 224908_s_at  | 150465 | <i>TTL</i>        | 2.17e-03 |
| 214224_s_at  | 5303   | <i>PIN4</i>       | 2.18e-03 |
| 209296_at    | 5495   | <i>PPM1B</i>      | 2.18e-03 |
| 203981_s_at  | 5826   | <i>ABCD4</i>      | 2.18e-03 |
| 214988_s_at  | 6651   | <i>SON</i>        | 2.18e-03 |
| 229307_at    | 23243  | <i>ANKRD28</i>    | 2.18e-03 |
| 202184_s_at  | 55746  | <i>NUP133</i>     | 2.18e-03 |
| 218713_at    | 79664  | <i>NARG2</i>      | 2.18e-03 |
| 227111_at    | 403341 | <i>ZBTB34</i>     | 2.18e-03 |
| 202055_at    | 3836   | <i>KPNA1</i>      | 2.19e-03 |
| 213328_at    | 4750   | <i>NEK1</i>       | 2.19e-03 |
| 228545_at    | 7707   | <i>ZNF148</i>     | 2.19e-03 |
| 204809_at    | 10845  | <i>CLPX</i>       | 2.19e-03 |

|              |           |                     |          |
|--------------|-----------|---------------------|----------|
| 219296_at    | 54503     | <i>ZDHHC13</i>      | 2.19e-03 |
| 1555384_a_at | 113251    | <i>LARP4</i>        | 2.19e-03 |
| 200726_at    | 5501      | <i>PPP1CC</i>       | 2.20e-03 |
| 224900_at    | 51479     | <i>ANKFY1</i>       | 2.20e-03 |
| 225819_at    | 84897     | <i>TBRG1</i>        | 2.20e-03 |
| 229640_x_at  | 100996930 | <i>LINC00621</i>    | 2.20e-03 |
| 214170_x_at  | 2271      | <i>FH</i>           | 2.21e-03 |
| 205427_at    | 6940      | <i>ZNF354A</i>      | 2.21e-03 |
| 210149_s_at  | 10476     | <i>ATP5H</i>        | 2.21e-03 |
| 224761_at    | 10672     | <i>GNAI3</i>        | 2.21e-03 |
| 209524_at    | 50810     | <i>HDGFRP3</i>      | 2.21e-03 |
| 225748_at    | 84946     | <i>LTV1</i>         | 2.21e-03 |
| 210664_s_at  | 7035      | <i>TFPI</i>         | 2.22e-03 |
| 203656_at    | 9896      | <i>FIG4</i>         | 2.22e-03 |
| 209796_s_at  | 10330     | <i>CNPY2</i>        | 2.22e-03 |
| 204700_x_at  | 27042     | <i>DIEXF</i>        | 2.22e-03 |
| 221046_s_at  | 29083     | <i>GTPBP8</i>       | 2.22e-03 |
| 221766_s_at  | 55603     | <i>FAM46A</i>       | 2.22e-03 |
| 221277_s_at  | 83480     | <i>PUS3</i>         | 2.22e-03 |
| 213315_x_at  | 91966     | <i>CXorf40A</i>     | 2.22e-03 |
| 224861_at    | 2776      | <i>GNAQ</i>         | 2.23e-03 |
| 201477_s_at  | 6240      | <i>RRM1</i>         | 2.23e-03 |
| 203515_s_at  | 10654     | <i>PMVK</i>         | 2.23e-03 |
| 215136_s_at  | 11340     | <i>EXOSC8</i>       | 2.23e-03 |
| 244546_at    | 54205     | <i>CYCS</i>         | 2.23e-03 |
| 224721_at    | 84128     | <i>WDR75</i>        | 2.23e-03 |
| 203376_at    | 51362     | <i>CDC40</i>        | 2.24e-03 |
| 226496_at    | 84186     | <i>ZCCHC7</i>       | 2.24e-03 |
| 210180_s_at  | 6434      | <i>TRA2B</i>        | 2.25e-03 |
| 223592_s_at  | 84282     | <i>RNF135</i>       | 2.25e-03 |
| 215268_at    | 643314    | <i>KIAA0754</i>     | 2.25e-03 |
| 209107_x_at  | 8648      | <i>NCOA1</i>        | 2.26e-03 |
| 227595_at    | 9204      | <i>ZMYM6</i>        | 2.26e-03 |
| 1560014_s_at | 23042     | <i>PDXDC1</i>       | 2.26e-03 |
| 212204_at    | 25963     | <i>TMEM87A</i>      | 2.26e-03 |
| 223387_at    | 53349     | <i>ZFYVE1</i>       | 2.26e-03 |
| 214659_x_at  | 56252     | <i>YLPM1</i>        | 2.26e-03 |
| 229872_s_at  | 100132999 | <i>LOC100132999</i> | 2.26e-03 |
| 204640_s_at  | 8405      | <i>SPOP</i>         | 2.27e-03 |
| 1554154_at   | 54834     | <i>GDAP2</i>        | 2.27e-03 |

|             |        |                  |          |
|-------------|--------|------------------|----------|
| 244761_at   | 401207 | <i>C5orf63</i>   | 2.27e-03 |
| 232909_s_at | 2186   | <i>BPTF</i>      | 2.28e-03 |
| 60815_at    | 84820  | <i>POLR2J4</i>   | 2.28e-03 |
| 200910_at   | 7203   | <i>CCT3</i>      | 2.29e-03 |
| 206095_s_at | 10772  | <i>SRSF10</i>    | 2.29e-03 |
| 201214_s_at | 5510   | <i>PPP1R7</i>    | 2.30e-03 |
| 209358_at   | 6882   | <i>TAF11</i>     | 2.30e-03 |
| 202090_s_at | 10975  | <i>UQCR11</i>    | 2.30e-03 |
| 218314_s_at | 55216  | <i>C11orf57</i>  | 2.30e-03 |
| 224938_at   | 57532  | <i>NUFIP2</i>    | 2.30e-03 |
| 1553978_at  | 729991 | <i>MEF2BNB</i>   | 2.30e-03 |
| 217768_at   | 51637  | <i>C14orf166</i> | 2.31e-03 |
| 227407_at   | 202018 | <i>TAPT1</i>     | 2.31e-03 |
| 209442_x_at | 288    | <i>ANK3</i>      | 2.32e-03 |
| 200621_at   | 1465   | <i>CSRP1</i>     | 2.32e-03 |
| 204177_s_at | 27252  | <i>KLHL20</i>    | 2.32e-03 |
| 219715_s_at | 55775  | <i>TDP1</i>      | 2.32e-03 |
| 232272_at   | 57547  | <i>ZNF624</i>    | 2.32e-03 |
| 225611_at   | 375449 | <i>MAST4</i>     | 2.32e-03 |
| 226430_at   | 768211 | <i>RELL1</i>     | 2.32e-03 |
| 214778_at   | 1954   | <i>MEGF8</i>     | 2.33e-03 |
| 225164_s_at | 440275 | <i>EIF2AK4</i>   | 2.33e-03 |
| 223213_s_at | 11244  | <i>ZHX1</i>      | 2.34e-03 |
| 232297_at   | 51088  | <i>KLHL5</i>     | 2.34e-03 |
| 213392_at   | 124152 | <i>IQCK</i>      | 2.34e-03 |
| 231866_at   | 4012   | <i>LNPEP</i>     | 2.35e-03 |
| 226115_at   | 25909  | <i>AHCTF1</i>    | 2.36e-03 |
| 207098_s_at | 55669  | <i>MFN1</i>      | 2.36e-03 |
| 223134_at   | 56987  | <i>BBX</i>       | 2.36e-03 |
| 223288_at   | 84640  | <i>USP38</i>     | 2.36e-03 |
| 202573_at   | 1455   | <i>CSNK1G2</i>   | 2.37e-03 |
| 202126_at   | 8899   | <i>PRPF4B</i>    | 2.37e-03 |
| 1555199_at  | 9527   | <i>GOSR1</i>     | 2.37e-03 |
| 210944_s_at | 825    | <i>CAPN3</i>     | 2.38e-03 |
| 229115_at   | 1778   | <i>DYNC1H1</i>   | 2.38e-03 |
| 200690_at   | 3313   | <i>HSPA9</i>     | 2.38e-03 |
| 227542_at   | 9306   | <i>SOCS6</i>     | 2.38e-03 |
| 201845_s_at | 23429  | <i>RYBP</i>      | 2.38e-03 |
| 1553957_at  | 163050 | <i>ZNF564</i>    | 2.38e-03 |
| 211988_at   | 6605   | <i>SMARCE1</i>   | 2.39e-03 |

|              |        |                   |          |
|--------------|--------|-------------------|----------|
| 214527_s_at  | 10084  | <i>PQBPI</i>      | 2.39e-03 |
| 201707_at    | 5824   | <i>PEX19</i>      | 2.40e-03 |
| 218111_s_at  | 55907  | <i>CMAS</i>       | 2.40e-03 |
| 210528_at    | 3140   | <i>MRI</i>        | 2.41e-03 |
| 239895_at    | 9716   | <i>AQR</i>        | 2.41e-03 |
| 221021_s_at  | 56259  | <i>CTNNBL1</i>    | 2.41e-03 |
| 221692_s_at  | 64981  | <i>MRPL34</i>     | 2.41e-03 |
| 217902_s_at  | 8924   | <i>HERC2</i>      | 2.42e-03 |
| 223527_s_at  | 81602  | <i>CDADC1</i>     | 2.42e-03 |
| 1553693_s_at | 84869  | <i>CBR4</i>       | 2.42e-03 |
| 50374_at     | 339229 | <i>OXMLD1</i>     | 2.42e-03 |
| 226203_at    | 4649   | <i>MYO9A</i>      | 2.43e-03 |
| 223598_at    | 5887   | <i>RAD23B</i>     | 2.43e-03 |
| 202034_x_at  | 9821   | <i>RB1CC1</i>     | 2.43e-03 |
| 214512_s_at  | 10923  | <i>SUB1</i>       | 2.43e-03 |
| 223002_s_at  | 22803  | <i>XRN2</i>       | 2.43e-03 |
| 201186_at    | 4043   | <i>LRPAP1</i>     | 2.44e-03 |
| 228613_at    | 9727   | <i>RAB11FIP3</i>  | 2.44e-03 |
| 202948_at    | 3554   | <i>IL1R1</i>      | 2.45e-03 |
| 200844_s_at  | 9588   | <i>PRDX6</i>      | 2.45e-03 |
| 202811_at    | 10617  | <i>STAMBP</i>     | 2.45e-03 |
| 214843_s_at  | 23032  | <i>USP33</i>      | 2.45e-03 |
| 227191_at    | 81533  | <i>ITFG1</i>      | 2.45e-03 |
| 225171_at    | 93663  | <i>ARHGAP18</i>   | 2.45e-03 |
| 226195_at    | 112752 | <i>IFT43</i>      | 2.45e-03 |
| 213292_s_at  | 23161  | <i>SNX13</i>      | 2.46e-03 |
| 213729_at    | 55660  | <i>PRPF40A</i>    | 2.46e-03 |
| 203532_x_at  | 8065   | <i>CUL5</i>       | 2.47e-03 |
| 220367_s_at  | 79595  | <i>SAP130</i>     | 2.48e-03 |
| 1566558_x_at | 440465 | <i>BAIAP2-AS1</i> | 2.48e-03 |
| 205105_at    | 4124   | <i>MAN2A1</i>     | 2.49e-03 |
| 208724_s_at  | 5861   | <i>RAB1A</i>      | 2.49e-03 |
| 202406_s_at  | 7073   | <i>TIAL1</i>      | 2.49e-03 |
| 203651_at    | 9765   | <i>ZFYVE16</i>    | 2.49e-03 |
| 224591_at    | 50809  | <i>HP1BP3</i>     | 2.49e-03 |
| 224369_s_at  | 81545  | <i>FBXO38</i>     | 2.49e-03 |
| 227699_at    | 112849 | <i>L3HYPDH</i>    | 2.49e-03 |
| 212584_at    | 9716   | <i>AQR</i>        | 2.50e-03 |
| 209704_at    | 22823  | <i>MTF2</i>       | 2.50e-03 |
| 213761_at    | 56890  | <i>MDM1</i>       | 2.50e-03 |

|             |        |                  |          |
|-------------|--------|------------------|----------|
| 231987_at   | 728264 | <i>MIR143HG</i>  | 2.50e-03 |
| 220553_s_at | 55015  | <i>PRPF39</i>    | 2.51e-03 |
| 218478_s_at | 55596  | <i>ZCCHC8</i>    | 2.51e-03 |
| 227698_s_at | 57799  | <i>RAB40C</i>    | 2.51e-03 |
| 230679_at   | 79269  | <i>DCAF10</i>    | 2.51e-03 |
| 201786_s_at | 103    | <i>ADAR</i>      | 2.52e-03 |
| 215016_x_at | 667    | <i>DST</i>       | 2.52e-03 |
| 201748_s_at | 6294   | <i>SAFB</i>      | 2.52e-03 |
| 225824_at   | 8812   | <i>CCNK</i>      | 2.52e-03 |
| 239185_at   | 10350  | <i>ABCA9</i>     | 2.52e-03 |
| 219345_at   | 51027  | <i>BOLA1</i>     | 2.53e-03 |
| 223382_s_at | 84937  | <i>ZNRF1</i>     | 2.54e-03 |
| 228211_at   | 375748 | <i>ERCC6L2</i>   | 2.54e-03 |
| 219553_at   | 29922  | <i>NME7</i>      | 2.55e-03 |
| 203897_at   | 57149  | <i>LYRM1</i>     | 2.55e-03 |
| 235940_at   | 84267  | <i>C9orf64</i>   | 2.55e-03 |
| 235347_at   | 84859  | <i>LRCH3</i>     | 2.55e-03 |
| 227200_at   | 2117   | <i>ETV3</i>      | 2.56e-03 |
| 242290_at   | 6867   | <i>TACC1</i>     | 2.56e-03 |
| 213794_s_at | 25983  | <i>NGDN</i>      | 2.56e-03 |
| 227160_s_at | 79133  | <i>NDUFAF5</i>   | 2.56e-03 |
| 227426_at   | 6654   | <i>SOS1</i>      | 2.57e-03 |
| 213229_at   | 23405  | <i>DICER1</i>    | 2.57e-03 |
| 203487_s_at | 25852  | <i>ARMC8</i>     | 2.57e-03 |
| 224569_s_at | 359948 | <i>IRF2BP2</i>   | 2.57e-03 |
| 227056_at   | 9812   | <i>KIAA0141</i>  | 2.58e-03 |
| 212572_at   | 23012  | <i>STK38L</i>    | 2.58e-03 |
| 215693_x_at | 55661  | <i>DDX27</i>     | 2.58e-03 |
| 201569_s_at | 25813  | <i>SAMM50</i>    | 2.59e-03 |
| 221741_s_at | 54915  | <i>YTHDF1</i>    | 2.59e-03 |
| 219335_at   | 64860  | <i>ARMCX5</i>    | 2.59e-03 |
| 213320_at   | 10196  | <i>PRMT3</i>     | 2.60e-03 |
| 212207_at   | 23389  | <i>MED13L</i>    | 2.60e-03 |
| 202170_s_at | 60496  | <i>AASDHPPT</i>  | 2.60e-03 |
| 226689_at   | 493856 | <i>CISD2</i>     | 2.60e-03 |
| 224822_at   | 10395  | <i>DLC1</i>      | 2.61e-03 |
| 209492_x_at | 521    | <i>ATP5I</i>     | 2.62e-03 |
| 211951_at   | 9221   | <i>NOLC1</i>     | 2.62e-03 |
| 227575_s_at | 55051  | <i>C14orf102</i> | 2.62e-03 |
| 218248_at   | 63901  | <i>FAM111A</i>   | 2.62e-03 |

|              |        |                 |          |
|--------------|--------|-----------------|----------|
| 1559848_at   | 387338 | <i>NSUN4</i>    | 2.62e-03 |
| 201164_s_at  | 9698   | <i>PUM1</i>     | 2.63e-03 |
| 201518_at    | 10951  | <i>CBX1</i>     | 2.63e-03 |
| 230129_at    | 118672 | <i>PSTK</i>     | 2.63e-03 |
| 213860_x_at  | 1452   | <i>CSNK1A1</i>  | 2.64e-03 |
| 213926_s_at  | 3267   | <i>AGFG1</i>    | 2.64e-03 |
| 203893_at    | 6880   | <i>TAF9</i>     | 2.64e-03 |
| 239948_at    | 9972   | <i>NUP153</i>   | 2.64e-03 |
| 218431_at    | 63894  | <i>VIPAS39</i>  | 2.64e-03 |
| 225498_at    | 128866 | <i>CHMP4B</i>   | 2.64e-03 |
| 242512_at    | 4649   | <i>MYO9A</i>    | 2.65e-03 |
| 200023_s_at  | 8665   | <i>EIF3F</i>    | 2.65e-03 |
| 215123_at    | 23117  | <i>NPIPL3</i>   | 2.65e-03 |
| 201054_at    | 10949  | <i>HNRNPA0</i>  | 2.66e-03 |
| 212997_s_at  | 11011  | <i>TLK2</i>     | 2.66e-03 |
| 222826_at    | 26258  | <i>BLOC1S6</i>  | 2.66e-03 |
| 229419_at    | 55294  | <i>FBXW7</i>    | 2.66e-03 |
| 204571_x_at  | 5303   | <i>PIN4</i>     | 2.67e-03 |
| 214221_at    | 7840   | <i>ALMS1</i>    | 2.67e-03 |
| 220044_x_at  | 51747  | <i>LUC7L3</i>   | 2.67e-03 |
| 211563_s_at  | 8725   | <i>UR11</i>     | 2.68e-03 |
| 227751_at    | 9141   | <i>PDCD5</i>    | 2.68e-03 |
| 1559822_s_at | 92140  | <i>MTDH</i>     | 2.68e-03 |
| 225166_at    | 93663  | <i>ARHGAP18</i> | 2.68e-03 |
| 223028_s_at  | 51429  | <i>SNX9</i>     | 2.69e-03 |
| 32541_at     | 5533   | <i>PPP3CC</i>   | 2.70e-03 |
| 208794_s_at  | 6597   | <i>SMARCA4</i>  | 2.70e-03 |
| 205726_at    | 1730   | <i>DIAPH2</i>   | 2.71e-03 |
| 214853_s_at  | 6464   | <i>SHC1</i>     | 2.71e-03 |
| 205089_at    | 7553   | <i>ZNF7</i>     | 2.71e-03 |
| 209922_at    | 8315   | <i>BRAP</i>     | 2.71e-03 |
| 222890_at    | 29070  | <i>CCDC113</i>  | 2.71e-03 |
| 215088_s_at  | 6391   | <i>SDHC</i>     | 2.72e-03 |
| 213922_at    | 146057 | <i>TTBK2</i>    | 2.72e-03 |
| 205435_s_at  | 22848  | <i>AAK1</i>     | 2.73e-03 |
| 235346_at    | 139341 | <i>FUNDC1</i>   | 2.73e-03 |
| 1554448_at   | 554203 | <i>JPX</i>      | 2.73e-03 |
| 201424_s_at  | 8451   | <i>CUL4A</i>    | 2.74e-03 |
| 209286_at    | 10602  | <i>CDC42EP3</i> | 2.74e-03 |
| 1555571_at   | 83943  | <i>IMMP2L</i>   | 2.74e-03 |



|             |        |                 |          |
|-------------|--------|-----------------|----------|
| 232127_at   | 1184   | <i>CLCN5</i>    | 2.75e-03 |
| 218304_s_at | 114885 | <i>OSBPL11</i>  | 2.75e-03 |
| 232441_at   | 11103  | <i>KRR1</i>     | 2.76e-03 |
| 218669_at   | 57826  | <i>RAP2C</i>    | 2.76e-03 |
| 216697_at   | 7204   | <i>TRIO</i>     | 2.77e-03 |
| 202466_at   | 11044  | <i>PAPD7</i>    | 2.77e-03 |
| 212765_at   | 23271  | <i>CAMSAP2</i>  | 2.77e-03 |
| 223270_at   | 51496  | <i>CTDSPL2</i>  | 2.77e-03 |
| 223217_s_at | 64332  | <i>NFKBIZ</i>   | 2.77e-03 |
| 238693_at   | 80012  | <i>PHC3</i>     | 2.77e-03 |
| 218775_s_at | 80014  | <i>WWC2</i>     | 2.77e-03 |
| 227871_at   | 1121   | <i>CHM</i>      | 2.78e-03 |
| 204791_at   | 7181   | <i>NR2C1</i>    | 2.78e-03 |
| 232180_at   | 7360   | <i>UGP2</i>     | 2.78e-03 |
| 213239_at   | 10464  | <i>PIBF1</i>    | 2.78e-03 |
| 209254_at   | 23008  | <i>KLHDC10</i>  | 2.78e-03 |
| 237444_at   | 63971  | <i>KIF13A</i>   | 2.78e-03 |
| 225380_at   | 91461  | <i>PKDCC</i>    | 2.78e-03 |
| 235955_at   | 153562 | <i>MARVELD2</i> | 2.78e-03 |
| 224497_x_at | 51171  | <i>HSD17B14</i> | 2.79e-03 |
| 222808_at   | 79868  | <i>ALG13</i>    | 2.79e-03 |
| 212530_at   | 140609 | <i>NEK7</i>     | 2.79e-03 |
| 203566_s_at | 178    | <i>AGL</i>      | 2.80e-03 |
| 223297_at   | 83607  | <i>AMMECRIL</i> | 2.80e-03 |
| 1569126_at  | 892    | <i>CCNC</i>     | 2.81e-03 |
| 202003_s_at | 10449  | <i>ACAA2</i>    | 2.81e-03 |
| 203567_s_at | 10475  | <i>TRIM38</i>   | 2.82e-03 |
| 209510_at   | 11236  | <i>RNF139</i>   | 2.82e-03 |
| 212503_s_at | 22982  | <i>DIP2C</i>    | 2.82e-03 |
| 212961_x_at | 541578 | <i>CXorf40B</i> | 2.82e-03 |
| 200977_s_at | 8887   | <i>TAX1BP1</i>  | 2.83e-03 |
| 212650_at   | 23301  | <i>EHBP1</i>    | 2.83e-03 |
| 225702_at   | 84933  | <i>C8orf76</i>  | 2.83e-03 |
| 238783_at   | 153396 | <i>TMEM161B</i> | 2.83e-03 |
| 200837_at   | 10134  | <i>BCAP31</i>   | 2.84e-03 |
| 201022_s_at | 11034  | <i>DSTN</i>     | 2.84e-03 |
| 208706_s_at | 1983   | <i>EIF5</i>     | 2.85e-03 |
| 214917_at   | 5562   | <i>PRKAA1</i>   | 2.85e-03 |
| 200025_s_at | 6155   | <i>RPL27</i>    | 2.85e-03 |
| 222787_s_at | 54664  | <i>TMEM106B</i> | 2.85e-03 |

|             |        |                  |          |
|-------------|--------|------------------|----------|
| 221736_at   | 57148  | <i>RALGAPB</i>   | 2.85e-03 |
| 201114_x_at | 5688   | <i>PSMA7</i>     | 2.86e-03 |
| 212470_at   | 9043   | <i>SPAG9</i>     | 2.86e-03 |
| 219906_at   | 55096  | <i>EBLN2</i>     | 2.86e-03 |
| 213430_at   | 22902  | <i>RUFY3</i>     | 2.87e-03 |
| 218977_s_at | 54952  | <i>TRNAUIAP</i>  | 2.87e-03 |
| 211015_s_at | 3308   | <i>HSPA4</i>     | 2.88e-03 |
| 210145_at   | 5321   | <i>PLA2G4A</i>   | 2.88e-03 |
| 238560_at   | 10241  | <i>CALCOCO2</i>  | 2.88e-03 |
| 203428_s_at | 25842  | <i>ASF1A</i>     | 2.88e-03 |
| 234936_s_at | 57545  | <i>CC2D2A</i>    | 2.88e-03 |
| 224778_s_at | 57551  | <i>TAOK1</i>     | 2.88e-03 |
| 223114_at   | 84274  | <i>COQ5</i>      | 2.88e-03 |
| 212457_at   | 7030   | <i>TFE3</i>      | 2.89e-03 |
| 214193_s_at | 27042  | <i>DIEXF</i>     | 2.89e-03 |
| 218413_s_at | 51193  | <i>ZNF639</i>    | 2.89e-03 |
| 224250_s_at | 79048  | <i>SECISBP2</i>  | 2.89e-03 |
| 224416_s_at | 80306  | <i>MED28</i>     | 2.89e-03 |
| 208805_at   | 5687   | <i>PSMA6</i>     | 2.90e-03 |
| 202304_at   | 22862  | <i>FNDC3A</i>    | 2.90e-03 |
| 213641_at   | 26048  | <i>ZNF500</i>    | 2.90e-03 |
| 217370_x_at | 2521   | <i>FUS</i>       | 2.91e-03 |
| 235146_at   | 57458  | <i>TMCC3</i>     | 2.91e-03 |
| 219174_at   | 80173  | <i>IFT74</i>     | 2.91e-03 |
| 223269_at   | 84265  | <i>POLR3GL</i>   | 2.91e-03 |
| 221135_s_at | 28990  | <i>ASTE1</i>     | 2.92e-03 |
| 214730_s_at | 2734   | <i>GLG1</i>      | 2.93e-03 |
| 223022_s_at | 51534  | <i>VTA1</i>      | 2.93e-03 |
| 235606_at   | 344595 | <i>LOC344595</i> | 2.93e-03 |
| 205452_at   | 9488   | <i>PIGB</i>      | 2.94e-03 |
| 200000_s_at | 10594  | <i>PRPF8</i>     | 2.94e-03 |
| 213440_at   | 5861   | <i>RAB1A</i>     | 2.95e-03 |
| 218206_x_at | 51282  | <i>SCAND1</i>    | 2.95e-03 |
| 219842_at   | 54622  | <i>ARL15</i>     | 2.95e-03 |
| 226155_at   | 57700  | <i>FAM160B1</i>  | 2.95e-03 |
| 203102_s_at | 4247   | <i>MGAT2</i>     | 2.96e-03 |
| 204300_at   | 5188   | <i>PET112</i>    | 2.96e-03 |
| 238909_at   | 6281   | <i>S100A10</i>   | 2.96e-03 |
| 201947_s_at | 10576  | <i>CCT2</i>      | 2.96e-03 |
| 33494_at    | 2110   | <i>ETFDH</i>     | 2.97e-03 |

|             |           |                     |          |
|-------------|-----------|---------------------|----------|
| 226048_at   | 5599      | <i>MAPK8</i>        | 2.97e-03 |
| 222026_at   | 5935      | <i>RBM3</i>         | 2.97e-03 |
| 222720_x_at | 54953     | <i>C1orf27</i>      | 2.97e-03 |
| 226521_s_at | 84142     | <i>FAM175A</i>      | 2.97e-03 |
| 201257_x_at | 6189      | <i>RPS3A</i>        | 2.98e-03 |
| 225084_at   | 10640     | <i>EXOC5</i>        | 2.98e-03 |
| 230656_s_at | 84916     | <i>CIRH1A</i>       | 2.98e-03 |
| 221193_s_at | 54819     | <i>ZCCHC10</i>      | 2.99e-03 |
| 222553_x_at | 55074     | <i>OXR1</i>         | 2.99e-03 |
| 222001_x_at | 728855    | <i>LINC00623</i>    | 2.99e-03 |
| 212533_at   | 7465      | <i>WEE1</i>         | 3.00e-03 |
| 225562_at   | 22821     | <i>RASA3</i>        | 3.00e-03 |
| 218339_at   | 29093     | <i>MRPL22</i>       | 3.00e-03 |
| 208882_s_at | 51366     | <i>UBR5</i>         | 3.00e-03 |
| 218187_s_at | 65265     | <i>C8orf33</i>      | 3.00e-03 |
| 226872_at   | 5990      | <i>RFX2</i>         | 3.01e-03 |
| 218470_at   | 51067     | <i>YARS2</i>        | 3.01e-03 |
| 221782_at   | 54431     | <i>DNAJC10</i>      | 3.01e-03 |
| 209743_s_at | 83737     | <i>ITCH</i>         | 3.01e-03 |
| 224504_s_at | 84811     | <i>BUD13</i>        | 3.01e-03 |
| 232918_at   | 541471    | <i>LOC541471</i>    | 3.01e-03 |
| 1557566_at  | 100507634 | <i>LOC100507634</i> | 3.01e-03 |
| 225302_at   | 54495     | <i>TMX3</i>         | 3.02e-03 |
| 226970_at   | 254170    | <i>FBXO33</i>       | 3.02e-03 |
| 242471_at   | 647135    | <i>SRGAP2B</i>      | 3.02e-03 |
| 234982_at   | 130507    | <i>UBR3</i>         | 3.03e-03 |
| 239596_at   | 148867    | <i>SLC30A7</i>      | 3.03e-03 |
| 219030_at   | 51002     | <i>TPRKB</i>        | 3.04e-03 |
| 222467_s_at | 55291     | <i>PPP6R3</i>       | 3.04e-03 |
| 205345_at   | 580       | <i>BARD1</i>        | 3.05e-03 |
| 222028_at   | 7596      | <i>ZNF45</i>        | 3.05e-03 |
| 220127_s_at | 54850     | <i>FBXL12</i>       | 3.05e-03 |
| 230071_at   | 55752     | <i>SEPT11</i>       | 3.05e-03 |
| 228442_at   | 4773      | <i>NFATC2</i>       | 3.06e-03 |
| 203329_at   | 5797      | <i>PTPRM</i>        | 3.06e-03 |
| 204559_s_at | 51690     | <i>LSM7</i>         | 3.06e-03 |
| 201241_at   | 1653      | <i>DDX1</i>         | 3.07e-03 |
| 222815_at   | 51132     | <i>RLIM</i>         | 3.08e-03 |
| 219206_x_at | 51643     | <i>TMBIM4</i>       | 3.08e-03 |
| 229193_at   | 51747     | <i>LUC7L3</i>       | 3.08e-03 |

|              |        |                   |          |
|--------------|--------|-------------------|----------|
| 212000_at    | 10147  | <i>SUGP2</i>      | 3.10e-03 |
| 211386_at    | 84786  | <i>MGC12488</i>   | 3.10e-03 |
| 214264_s_at  | 90141  | <i>EFCAB11</i>    | 3.10e-03 |
| 244828_x_at  | 92345  | <i>NAF1</i>       | 3.10e-03 |
| 225014_at    | 389203 | <i>C4orf52</i>    | 3.10e-03 |
| 225796_at    | 54899  | <i>PXK</i>        | 3.11e-03 |
| 219146_at    | 79736  | <i>TEFM</i>       | 3.11e-03 |
| 244121_at    | 130507 | <i>UBR3</i>       | 3.11e-03 |
| 208705_s_at  | 1983   | <i>EIF5</i>       | 3.12e-03 |
| 226330_s_at  | 55578  | <i>FAM48A</i>     | 3.12e-03 |
| 241727_x_at  | 200895 | <i>DHFRL1</i>     | 3.12e-03 |
| 202396_at    | 10915  | <i>TCERG1</i>     | 3.13e-03 |
| 225675_at    | 54916  | <i>C14orf101</i>  | 3.13e-03 |
| 1569142_at   | 10206  | <i>TRIM13</i>     | 3.14e-03 |
| 225017_at    | 64770  | <i>CCDC14</i>     | 3.14e-03 |
| 202309_at    | 4522   | <i>MTHFD1</i>     | 3.15e-03 |
| 212804_s_at  | 26130  | <i>GAPVD1</i>     | 3.15e-03 |
| 232630_at    | 51074  | <i>APIP</i>       | 3.15e-03 |
| 226637_at    | 7328   | <i>UBE2H</i>      | 3.16e-03 |
| 229813_x_at  | 26528  | <i>DAZAP1</i>     | 3.16e-03 |
| 1553993_s_at | 81857  | <i>MED25</i>      | 3.16e-03 |
| 222464_s_at  | 79892  | <i>MCMBP</i>      | 3.17e-03 |
| 204173_at    | 140465 | <i>MYL6B</i>      | 3.17e-03 |
| 202352_s_at  | 5718   | <i>PSMD12</i>     | 3.19e-03 |
| 218760_at    | 51004  | <i>COQ6</i>       | 3.19e-03 |
| 222580_at    | 84146  | <i>ZNF644</i>     | 3.19e-03 |
| 208615_s_at  | 8073   | <i>PTP4A2</i>     | 3.20e-03 |
| 225321_s_at  | 29990  | <i>PILRB</i>      | 3.20e-03 |
| 1566557_at   | 440465 | <i>BAIAP2-AS1</i> | 3.20e-03 |
| 225037_at    | 51006  | <i>SLC35C2</i>    | 3.21e-03 |
| 212744_at    | 585    | <i>BBS4</i>       | 3.22e-03 |
| 225740_x_at  | 4194   | <i>MDM4</i>       | 3.22e-03 |
| 39729_at     | 7001   | <i>PRDX2</i>      | 3.22e-03 |
| 1554158_at   | 10771  | <i>ZMYND11</i>    | 3.22e-03 |
| 239917_at    | 23355  | <i>VPS8</i>       | 3.23e-03 |
| 225326_at    | 54439  | <i>RBM27</i>      | 3.23e-03 |
| 212910_at    | 57215  | <i>THAP11</i>     | 3.23e-03 |
| 214722_at    | 388677 | <i>NOTCH2NL</i>   | 3.23e-03 |
| 214709_s_at  | 3895   | <i>KTNI</i>       | 3.24e-03 |
| 222552_at    | 51026  | <i>GOLT1B</i>     | 3.24e-03 |

|              |           |                     |          |
|--------------|-----------|---------------------|----------|
| 241816_at    | 55320     | <i>MIS18BP1</i>     | 3.24e-03 |
| 206335_at    | 2588      | <i>GALNS</i>        | 3.25e-03 |
| 227075_at    | 55140     | <i>ELP3</i>         | 3.25e-03 |
| 234295_at    | 51163     | <i>DBR1</i>         | 3.26e-03 |
| 203065_s_at  | 857       | <i>CAVI</i>         | 3.27e-03 |
| 200781_s_at  | 6210      | <i>RPS15A</i>       | 3.27e-03 |
| 222621_at    | 64215     | <i>DNAJC1</i>       | 3.27e-03 |
| 204435_at    | 9818      | <i>NUPL1</i>        | 3.28e-03 |
| 231283_at    | 11320     | <i>MGAT4A</i>       | 3.28e-03 |
| 221825_at    | 90806     | <i>ANGEL2</i>       | 3.28e-03 |
| 216870_x_at  | 8847      | <i>DLEU2</i>        | 3.29e-03 |
| 218646_at    | 54969     | <i>C4orf27</i>      | 3.29e-03 |
| 212491_s_at  | 22826     | <i>DNAJC8</i>       | 3.30e-03 |
| 227839_at    | 55777     | <i>MBD5</i>         | 3.30e-03 |
| 218285_s_at  | 56898     | <i>BDH2</i>         | 3.30e-03 |
| 221738_at    | 57148     | <i>RALGAPB</i>      | 3.30e-03 |
| 213957_s_at  | 9857      | <i>CEP350</i>       | 3.31e-03 |
| 1556672_a_at | 10180     | <i>RBM6</i>         | 3.31e-03 |
| 224843_at    | 57606     | <i>SLAIN2</i>       | 3.31e-03 |
| 223418_x_at  | 81573     | <i>ANKRD13C</i>     | 3.31e-03 |
| 212971_at    | 833       | <i>CARS</i>         | 3.32e-03 |
| 214374_s_at  | 8496      | <i>PPFIBP1</i>      | 3.32e-03 |
| 232586_x_at  | 100133315 | <i>LOC100133315</i> | 3.32e-03 |
| 210766_s_at  | 1434      | <i>CSEIL</i>        | 3.33e-03 |
| 204014_at    | 1846      | <i>DUSP4</i>        | 3.33e-03 |
| 227685_at    | 7110      | <i>TMF1</i>         | 3.33e-03 |
| 1554153_a_at | 51317     | <i>PHF21A</i>       | 3.33e-03 |
| 1565887_at   | 54822     | <i>TRPM7</i>        | 3.33e-03 |
| 227579_at    | 2241      | <i>FER</i>          | 3.34e-03 |
| 226426_at    | 23394     | <i>ADNP</i>         | 3.34e-03 |
| 206825_at    | 5021      | <i>OXTR</i>         | 3.35e-03 |
| 1557036_at   | 22890     | <i>ZBTB1</i>        | 3.35e-03 |
| 226951_at    | 79074     | <i>C2orf49</i>      | 3.35e-03 |
| 214965_at    | 124044    | <i>SPATA2L</i>      | 3.35e-03 |
| 215229_at    | 100129973 | <i>LOC100129973</i> | 3.35e-03 |
| 209058_at    | 8721      | <i>EDF1</i>         | 3.36e-03 |
| 212107_s_at  | 1660      | <i>DHX9</i>         | 3.37e-03 |
| 202259_s_at  | 10443     | <i>N4BP2L2</i>      | 3.38e-03 |
| 213762_x_at  | 27316     | <i>RBMX</i>         | 3.38e-03 |
| 233873_x_at  | 55149     | <i>MTPAP</i>        | 3.38e-03 |

|             |        |                 |          |
|-------------|--------|-----------------|----------|
| 235158_at   | 84928  | <i>TMEM209</i>  | 3.38e-03 |
| 200036_s_at | 4736   | <i>RPL10A</i>   | 3.39e-03 |
| 235125_x_at | 374986 | <i>FAM73A</i>   | 3.39e-03 |
| 212184_s_at | 23118  | <i>TAB2</i>     | 3.40e-03 |
| 210053_at   | 6877   | <i>TAF5</i>     | 3.41e-03 |
| 203062_s_at | 9656   | <i>MDC1</i>     | 3.41e-03 |
| 203763_at   | 51626  | <i>DYNC2L1I</i> | 3.41e-03 |
| 213340_s_at | 57212  | <i>TP73-AS1</i> | 3.41e-03 |
| 222894_x_at | 79133  | <i>NDUFAF5</i>  | 3.41e-03 |
| 235698_at   | 146198 | <i>ZFP90</i>    | 3.41e-03 |
| 236367_at   | 9887   | <i>SMG7</i>     | 3.42e-03 |
| 202596_at   | 2029   | <i>ENSA</i>     | 3.43e-03 |
| 209350_s_at | 2874   | <i>GPS2</i>     | 3.43e-03 |
| 213982_s_at | 9910   | <i>RABGAP1L</i> | 3.43e-03 |
| 214061_at   | 93594  | <i>WDR67</i>    | 3.43e-03 |
| 229886_at   | 375444 | <i>C5orf34</i>  | 3.43e-03 |
| 204327_s_at | 7753   | <i>ZNF202</i>   | 3.44e-03 |
| 218357_s_at | 26521  | <i>TIMM8B</i>   | 3.44e-03 |
| 237179_at   | 55251  | <i>PCMTD2</i>   | 3.44e-03 |
| 219392_x_at | 55771  | <i>PRR11</i>    | 3.44e-03 |
| 228697_at   | 135114 | <i>HINT3</i>    | 3.44e-03 |
| 223200_s_at | 55341  | <i>LSG1</i>     | 3.45e-03 |
| 228282_at   | 256471 | <i>MFSD8</i>    | 3.45e-03 |
| 202905_x_at | 4683   | <i>NBN</i>      | 3.46e-03 |
| 203875_at   | 6594   | <i>SMARCA1</i>  | 3.46e-03 |
| 225240_s_at | 124540 | <i>MSI2</i>     | 3.46e-03 |
| 223780_s_at | 9969   | <i>MED13</i>    | 3.47e-03 |
| 31874_at    | 10634  | <i>GAS2L1</i>   | 3.47e-03 |
| 212060_at   | 23350  | <i>U2SURP</i>   | 3.47e-03 |
| 203621_at   | 4711   | <i>NDUFB5</i>   | 3.48e-03 |
| 227476_at   | 9926   | <i>LPGAT1</i>   | 3.48e-03 |
| 227087_at   | 3631   | <i>INPP4A</i>   | 3.49e-03 |
| 200812_at   | 10574  | <i>CCT7</i>     | 3.49e-03 |
| 205181_at   | 7746   | <i>ZNF193</i>   | 3.50e-03 |
| 201936_s_at | 8672   | <i>EIF4G3</i>   | 3.50e-03 |
| 220917_s_at | 57728  | <i>WDR19</i>    | 3.50e-03 |
| 207405_s_at | 5884   | <i>RAD17</i>    | 3.51e-03 |
| 236016_at   | 6605   | <i>SMARCE1</i>  | 3.51e-03 |
| 212875_s_at | 25966  | <i>C2CD2</i>    | 3.52e-03 |
| 231875_at   | 55605  | <i>KIF21A</i>   | 3.52e-03 |

|              |        |                  |          |
|--------------|--------|------------------|----------|
| 219673_at    | 254394 | <i>MCM9</i>      | 3.52e-03 |
| 226165_at    | 401466 | <i>C8orf59</i>   | 3.53e-03 |
| 1558184_s_at | 7565   | <i>ZNF17</i>     | 3.54e-03 |
| 202078_at    | 8533   | <i>COPS3</i>     | 3.54e-03 |
| 205087_at    | 25950  | <i>RWDD3</i>     | 3.54e-03 |
| 229574_at    | 29896  | <i>TRA2A</i>     | 3.54e-03 |
| 201918_at    | 55186  | <i>SLC25A36</i>  | 3.54e-03 |
| 1556051_a_at | 636    | <i>BICD1</i>     | 3.56e-03 |
| 208714_at    | 4723   | <i>NDUFV1</i>    | 3.56e-03 |
| 206928_at    | 7678   | <i>ZNF124</i>    | 3.56e-03 |
| 1562095_at   | 7871   | <i>SLMAP</i>     | 3.56e-03 |
| 218605_at    | 64216  | <i>TFB2M</i>     | 3.56e-03 |
| 229908_s_at  | 64718  | <i>UNKL</i>      | 3.56e-03 |
| 227270_at    | 285550 | <i>FAM200B</i>   | 3.56e-03 |
| 227814_at    | 348793 | <i>WDR53</i>     | 3.56e-03 |
| 229870_at    | 644656 | <i>LOC644656</i> | 3.56e-03 |
| 210105_s_at  | 2534   | <i>FYN</i>       | 3.57e-03 |
| 208411_x_at  | 5470   | <i>PPEF2</i>     | 3.57e-03 |
| 226398_s_at  | 118924 | <i>FRA10AC1</i>  | 3.57e-03 |
| 202821_s_at  | 4026   | <i>LPP</i>       | 3.58e-03 |
| 214250_at    | 4926   | <i>NUMA1</i>     | 3.58e-03 |
| 209561_at    | 7059   | <i>THBS3</i>     | 3.58e-03 |
| 221192_x_at  | 79157  | <i>MFSD11</i>    | 3.58e-03 |
| 212523_s_at  | 23514  | <i>KIAA0146</i>  | 3.59e-03 |
| 1564164_at   | 163486 | <i>DENND1B</i>   | 3.59e-03 |
| 212745_s_at  | 585    | <i>BBS4</i>      | 3.61e-03 |
| 218941_at    | 26190  | <i>FBXW2</i>     | 3.61e-03 |
| 218991_at    | 63897  | <i>HEATR6</i>    | 3.61e-03 |
| 226387_at    | 222194 | <i>RSBNIL</i>    | 3.61e-03 |
| 238722_x_at  | 222236 | <i>NAPEPLD</i>   | 3.61e-03 |
| 211939_x_at  | 689    | <i>BTF3</i>      | 3.62e-03 |
| 232483_at    | 9440   | <i>MED17</i>     | 3.62e-03 |
| 239757_at    | 54469  | <i>ZFAND6</i>    | 3.63e-03 |
| 225937_at    | 1523   | <i>CUX1</i>      | 3.64e-03 |
| 209902_at    | 545    | <i>ATR</i>       | 3.65e-03 |
| 209945_s_at  | 2932   | <i>GSK3B</i>     | 3.65e-03 |
| 213459_at    | 6168   | <i>RPL37A</i>    | 3.65e-03 |
| 213452_at    | 7738   | <i>ZNF184</i>    | 3.65e-03 |
| 205704_s_at  | 23545  | <i>ATP6V0A2</i>  | 3.65e-03 |
| 212954_at    | 8798   | <i>DYRK4</i>     | 3.66e-03 |

|             |           |                     |          |
|-------------|-----------|---------------------|----------|
| 219785_s_at | 79791     | <i>FBXO31</i>       | 3.66e-03 |
| 213446_s_at | 8826      | <i>IQGAP1</i>       | 3.67e-03 |
| 218181_s_at | 9448      | <i>MAP4K4</i>       | 3.67e-03 |
| 214664_at   | 10606     | <i>PAICS</i>        | 3.68e-03 |
| 225083_at   | 112495    | <i>GTF3C6</i>       | 3.68e-03 |
| 221819_at   | 11021     | <i>RAB35</i>        | 3.70e-03 |
| 201566_x_at | 3398      | <i>ID2</i>          | 3.71e-03 |
| 204676_at   | 25880     | <i>TMEM186</i>      | 3.71e-03 |
| 225509_at   | 79685     | <i>SAP30L</i>       | 3.71e-03 |
| 224430_s_at | 25821     | <i>MTO1</i>         | 3.73e-03 |
| 203221_at   | 7088      | <i>TLE1</i>         | 3.74e-03 |
| 201166_s_at | 9698      | <i>PUM1</i>         | 3.74e-03 |
| 215641_at   | 9871      | <i>SEC24D</i>       | 3.74e-03 |
| 235384_at   | 390916    | <i>NUDT19</i>       | 3.74e-03 |
| 236645_at   | 100506312 | <i>LOC100506312</i> | 3.74e-03 |
| 208708_x_at | 1983      | <i>EIF5</i>         | 3.75e-03 |
| 220456_at   | 55304     | <i>SPTLC3</i>       | 3.75e-03 |
| 228129_at   | 26135     | <i>SERBP1</i>       | 3.76e-03 |
| 228736_at   | 113510    | <i>HELQ</i>         | 3.76e-03 |
| 228647_at   | 100049716 | <i>LOC100049716</i> | 3.76e-03 |
| 207132_x_at | 5204      | <i>PFDN5</i>        | 3.77e-03 |
| 240928_at   | 51077     | <i>FCF1</i>         | 3.77e-03 |
| 211503_s_at | 51552     | <i>RAB14</i>        | 3.77e-03 |
| 218852_at   | 55012     | <i>PPP2R3C</i>      | 3.77e-03 |
| 217804_s_at | 3609      | <i>ILF3</i>         | 3.78e-03 |
| 200877_at   | 10575     | <i>CCT4</i>         | 3.78e-03 |
| 209447_at   | 23345     | <i>SYNE1</i>        | 3.78e-03 |
| 211721_s_at | 90233     | <i>ZNF551</i>       | 3.78e-03 |
| 224951_at   | 91012     | <i>CERS5</i>        | 3.78e-03 |
| 212742_at   | 27246     | <i>RNF115</i>       | 3.79e-03 |
| 227095_at   | 54741     | <i>LEPROT</i>       | 3.79e-03 |
| 215567_at   | 51077     | <i>FCF1</i>         | 3.80e-03 |
| 223590_at   | 90592     | <i>ZNF700</i>       | 3.80e-03 |
| 210102_at   | 4013      | <i>VWA5A</i>        | 3.81e-03 |
| 202209_at   | 27258     | <i>LSM3</i>         | 3.81e-03 |
| 218370_s_at | 64766     | <i>S100PBP</i>      | 3.81e-03 |
| 236816_at   | 80018     | <i>NAA25</i>        | 3.81e-03 |
| 213002_at   | 4082      | <i>MARCKS</i>       | 3.82e-03 |
| 200855_at   | 9611      | <i>NCOR1</i>        | 3.82e-03 |
| 204370_at   | 10978     | <i>CLP1</i>         | 3.83e-03 |



|              |        |                  |          |
|--------------|--------|------------------|----------|
| 1569385_s_at | 54790  | <i>TET2</i>      | 3.83e-03 |
| 214177_s_at  | 57326  | <i>PBXIP1</i>    | 3.83e-03 |
| 233164_x_at  | 84236  | <i>RHBDD1</i>    | 3.83e-03 |
| 232312_at    | 55291  | <i>PPP6R3</i>    | 3.84e-03 |
| 224647_at    | 219771 | <i>CCNY</i>      | 3.84e-03 |
| 215162_at    | 253959 | <i>RALGAP1</i>   | 3.84e-03 |
| 223639_s_at  | 30834  | <i>ZNRD1</i>     | 3.85e-03 |
| 238067_at    | 54885  | <i>TBC1D8B</i>   | 3.85e-03 |
| 239232_at    | 124540 | <i>MSI2</i>      | 3.85e-03 |
| 235509_at    | 137682 | <i>NDUFAF6</i>   | 3.85e-03 |
| 212342_at    | 286451 | <i>YIPF6</i>     | 3.85e-03 |
| 235567_at    | 6095   | <i>RORA</i>      | 3.86e-03 |
| 217527_s_at  | 84901  | <i>NFATC2IP</i>  | 3.86e-03 |
| 216941_s_at  | 9014   | <i>TAF1B</i>     | 3.87e-03 |
| 203848_at    | 10270  | <i>AKAP8</i>     | 3.87e-03 |
| 228014_at    | 138428 | <i>PTRH1</i>     | 3.87e-03 |
| 226668_at    | 151525 | <i>WDSUB1</i>    | 3.87e-03 |
| 242133_s_at  | 654342 | <i>LOC654342</i> | 3.87e-03 |
| 203222_s_at  | 7088   | <i>TLE1</i>      | 3.88e-03 |
| 226366_at    | 257218 | <i>SHPRH</i>     | 3.88e-03 |
| 218909_at    | 26750  | <i>RPS6KC1</i>   | 3.89e-03 |
| 1562442_a_at | 6742   | <i>SSBP1</i>     | 3.90e-03 |
| 222606_at    | 55055  | <i>ZWILCH</i>    | 3.90e-03 |
| 222433_at    | 55740  | <i>ENAH</i>      | 3.90e-03 |
| 235648_at    | 163081 | <i>ZNF567</i>    | 3.90e-03 |
| 212209_at    | 23389  | <i>MED13L</i>    | 3.91e-03 |
| 202302_s_at  | 65117  | <i>RSRC2</i>     | 3.91e-03 |
| 226337_at    | 92344  | <i>GORAB</i>     | 3.91e-03 |
| 1556493_a_at | 23081  | <i>KDM4C</i>     | 3.92e-03 |
| 228111_s_at  | 25981  | <i>DNAH1</i>     | 3.92e-03 |
| 223018_at    | 28987  | <i>NOB1</i>      | 3.92e-03 |
| 208986_at    | 6938   | <i>TCF12</i>     | 3.93e-03 |
| 201844_s_at  | 23429  | <i>RYBP</i>      | 3.93e-03 |
| 212407_at    | 51603  | <i>METTL13</i>   | 3.93e-03 |
| 209688_s_at  | 54520  | <i>CCDC93</i>    | 3.93e-03 |
| 236837_x_at  | 650794 | <i>MIPEPP3</i>   | 3.93e-03 |
| 217982_s_at  | 10933  | <i>MORF4L1</i>   | 3.94e-03 |
| 213001_at    | 23452  | <i>ANGPTL2</i>   | 3.94e-03 |
| 219602_s_at  | 63895  | <i>PIEZO2</i>    | 3.94e-03 |
| 202447_at    | 1666   | <i>DECRI</i>     | 3.95e-03 |

|              |        |                  |          |
|--------------|--------|------------------|----------|
| 211946_s_at  | 23215  | <i>PRRC2C</i>    | 3.95e-03 |
| 223368_s_at  | 28989  | <i>NTMT1</i>     | 3.95e-03 |
| 228693_at    | 152137 | <i>CCDC50</i>    | 3.95e-03 |
| 226965_at    | 201627 | <i>FAM116A</i>   | 3.95e-03 |
| 209130_at    | 8773   | <i>SNAP23</i>    | 3.96e-03 |
| 1552378_s_at | 157506 | <i>RDH10</i>     | 3.96e-03 |
| 1554476_x_at | 388558 | <i>ZNF808</i>    | 3.96e-03 |
| 230028_at    | 22889  | <i>KIAA0907</i>  | 3.97e-03 |
| 214663_at    | 25778  | <i>DSTYK</i>     | 3.97e-03 |
| 238601_at    | 5257   | <i>PHKB</i>      | 3.98e-03 |
| 212140_at    | 23244  | <i>PDS5A</i>     | 3.99e-03 |
| 212689_s_at  | 55818  | <i>KDM3A</i>     | 3.99e-03 |
| 227239_at    | 84668  | <i>FAM126A</i>   | 3.99e-03 |
| 243696_at    | 9731   | <i>CEP104</i>    | 4.00e-03 |
| 203306_s_at  | 10559  | <i>SLC35A1</i>   | 4.00e-03 |
| 222883_at    | 65260  | <i>SELRC1</i>    | 4.00e-03 |
| 226225_at    | 4163   | <i>MCC</i>       | 4.01e-03 |
| 212848_s_at  | 84909  | <i>C9orf3</i>    | 4.01e-03 |
| 202569_s_at  | 4140   | <i>MARK3</i>     | 4.02e-03 |
| 202305_s_at  | 9637   | <i>FEZ2</i>      | 4.02e-03 |
| 214231_s_at  | 23078  | <i>VWA8</i>      | 4.02e-03 |
| 201580_s_at  | 56255  | <i>TMX4</i>      | 4.02e-03 |
| 242224_at    | 55105  | <i>GPATCH2</i>   | 4.03e-03 |
| 213269_at    | 57209  | <i>ZNF248</i>    | 4.03e-03 |
| 223711_s_at  | 29087  | <i>THYN1</i>     | 4.04e-03 |
| 238879_at    | 54165  | <i>DCUN1D1</i>   | 4.04e-03 |
| 232000_at    | 158219 | <i>TTC39B</i>    | 4.04e-03 |
| 222530_s_at  | 8195   | <i>MKKS</i>      | 4.05e-03 |
| 224180_x_at  | 51057  | <i>WDPCP</i>     | 4.05e-03 |
| 223519_at    | 51776  | <i>ZAK</i>       | 4.05e-03 |
| 239831_at    | 79022  | <i>TMEM106C</i>  | 4.05e-03 |
| 219599_at    | 1975   | <i>EIF4B</i>     | 4.06e-03 |
| 217926_at    | 28974  | <i>C19orf53</i>  | 4.06e-03 |
| 232911_at    | 57677  | <i>ZFP14</i>     | 4.06e-03 |
| 235643_at    | 219285 | <i>SAMD9L</i>    | 4.06e-03 |
| 204071_s_at  | 10210  | <i>TOPORS</i>    | 4.07e-03 |
| 217196_s_at  | 23271  | <i>CAMSAP2</i>   | 4.07e-03 |
| 218651_s_at  | 55323  | <i>LARP6</i>     | 4.07e-03 |
| 233106_at    | 145438 | <i>FRMD6-AS1</i> | 4.07e-03 |
| 203707_at    | 10127  | <i>ZNF263</i>    | 4.08e-03 |

|              |        |                  |          |
|--------------|--------|------------------|----------|
| 223431_at    | 55330  | <i>BLOC1S4</i>   | 4.08e-03 |
| 224897_at    | 80232  | <i>WDR26</i>     | 4.09e-03 |
| 210438_x_at  | 6738   | <i>TROVE2</i>    | 4.10e-03 |
| 1561206_at   | 57563  | <i>KLHL8</i>     | 4.11e-03 |
| 220940_at    | 57730  | <i>ANKRD36B</i>  | 4.12e-03 |
| 210283_x_at  | 10605  | <i>PAIP1</i>     | 4.13e-03 |
| 224632_at    | 54865  | <i>GPATCH4</i>   | 4.14e-03 |
| 202852_s_at  | 79719  | <i>AAGAB</i>     | 4.14e-03 |
| 220609_at    | 202181 | <i>LOC202181</i> | 4.14e-03 |
| 231292_at    | 493861 | <i>EID3</i>      | 4.14e-03 |
| 209681_at    | 10560  | <i>SLC19A2</i>   | 4.15e-03 |
| 224905_at    | 80232  | <i>WDR26</i>     | 4.15e-03 |
| 243417_at    | 284273 | <i>ZADH2</i>     | 4.15e-03 |
| 221290_s_at  | 84939  | <i>MUM1</i>      | 4.16e-03 |
| 200047_s_at  | 7528   | <i>YY1</i>       | 4.17e-03 |
| 200728_at    | 10097  | <i>ACTR2</i>     | 4.17e-03 |
| 212170_at    | 10137  | <i>RBM12</i>     | 4.17e-03 |
| 203571_s_at  | 10974  | <i>C10orf116</i> | 4.17e-03 |
| 212704_at    | 23318  | <i>ZCCHC11</i>   | 4.17e-03 |
| 231716_at    | 54542  | <i>RC3H2</i>     | 4.17e-03 |
| 1554277_s_at | 57697  | <i>FANCM</i>     | 4.17e-03 |
| 226464_at    | 205428 | <i>C3orf58</i>   | 4.18e-03 |
| 209932_s_at  | 1854   | <i>DUT</i>       | 4.19e-03 |
| 219862_s_at  | 26502  | <i>NARF</i>      | 4.19e-03 |
| 202194_at    | 50999  | <i>TMED5</i>     | 4.19e-03 |
| 206451_at    | 55171  | <i>TBCCD1</i>    | 4.19e-03 |
| 218097_s_at  | 79004  | <i>CUEDC2</i>    | 4.19e-03 |
| 213256_at    | 115123 | <i>MARCH3</i>    | 4.19e-03 |
| 227465_at    | 23383  | <i>MAU2</i>      | 4.20e-03 |
| 212446_s_at  | 253782 | <i>CERS6</i>     | 4.20e-03 |
| 222047_s_at  | 51593  | <i>SRRT</i>      | 4.21e-03 |
| 203787_at    | 23635  | <i>SSBP2</i>     | 4.22e-03 |
| 200942_s_at  | 3281   | <i>HSBP1</i>     | 4.23e-03 |
| 221832_s_at  | 7798   | <i>LUZP1</i>     | 4.23e-03 |
| 224968_at    | 112942 | <i>CCDC104</i>   | 4.23e-03 |
| 238681_at    | 284161 | <i>GDPD1</i>     | 4.23e-03 |
| 225340_s_at  | 4076   | <i>CAPRIN1</i>   | 4.24e-03 |
| 239024_at    | 7707   | <i>ZNF148</i>    | 4.24e-03 |
| 226554_at    | 51341  | <i>ZBTB7A</i>    | 4.24e-03 |
| 225810_at    | 54893  | <i>MTMR10</i>    | 4.24e-03 |

|              |        |                  |          |
|--------------|--------|------------------|----------|
| 221208_s_at  | 79684  | <i>MSANTD2</i>   | 4.24e-03 |
| 209944_at    | 57862  | <i>ZNF410</i>    | 4.25e-03 |
| 209310_s_at  | 837    | <i>CASP4</i>     | 4.26e-03 |
| 205530_at    | 2110   | <i>ETFDH</i>     | 4.26e-03 |
| 203075_at    | 4087   | <i>SMAD2</i>     | 4.26e-03 |
| 201803_at    | 5431   | <i>POLR2B</i>    | 4.26e-03 |
| 204074_s_at  | 9731   | <i>CEP104</i>    | 4.27e-03 |
| 208109_s_at  | 81698  | <i>LINC00597</i> | 4.27e-03 |
| 230389_at    | 23048  | <i>FNBP1</i>     | 4.28e-03 |
| 222465_at    | 51187  | <i>RSL24D1</i>   | 4.28e-03 |
| 225273_at    | 55841  | <i>WWC3</i>      | 4.28e-03 |
| 65493_at     | 63897  | <i>HEATR6</i>    | 4.28e-03 |
| 200658_s_at  | 5245   | <i>PHB</i>       | 4.30e-03 |
| 214093_s_at  | 8880   | <i>FUBP1</i>     | 4.30e-03 |
| 205308_at    | 51101  | <i>ZC2HC1A</i>   | 4.30e-03 |
| 202355_s_at  | 2962   | <i>GTF2F1</i>    | 4.31e-03 |
| 222410_s_at  | 58533  | <i>SNX6</i>      | 4.31e-03 |
| 236557_at    | 253461 | <i>ZBTB38</i>    | 4.31e-03 |
| 226652_at    | 9960   | <i>USP3</i>      | 4.34e-03 |
| 1554513_s_at | 84902  | <i>CEP89</i>     | 4.34e-03 |
| 201326_at    | 908    | <i>CCT6A</i>     | 4.35e-03 |
| 201143_s_at  | 1965   | <i>EIF2S1</i>    | 4.36e-03 |
| 222768_s_at  | 51605  | <i>TRMT6</i>     | 4.36e-03 |
| 1557275_a_at | 727910 | <i>TLCD2</i>     | 4.36e-03 |
| 213088_s_at  | 23234  | <i>DNAJC9</i>    | 4.37e-03 |
| 231090_s_at  | 196528 | <i>ARID2</i>     | 4.37e-03 |
| 203227_s_at  | 6302   | <i>TSPAN31</i>   | 4.38e-03 |
| 209390_at    | 7248   | <i>TSC1</i>      | 4.38e-03 |
| 212836_at    | 10714  | <i>POLD3</i>     | 4.38e-03 |
| 201634_s_at  | 80777  | <i>CYB5B</i>     | 4.39e-03 |
| 225930_at    | 28512  | <i>NKIRAS1</i>   | 4.40e-03 |
| 218667_at    | 64219  | <i>PJAI</i>      | 4.40e-03 |
| 203140_at    | 604    | <i>BCL6</i>      | 4.41e-03 |
| 238056_at    | 6391   | <i>SDHC</i>      | 4.41e-03 |
| 229982_at    | 79832  | <i>QSER1</i>     | 4.41e-03 |
| 225770_at    | 89970  | <i>RSPRY1</i>    | 4.41e-03 |
| 214173_x_at  | 8725   | <i>UR11</i>      | 4.42e-03 |
| 232138_at    | 10150  | <i>MBNL2</i>     | 4.42e-03 |
| 235232_at    | 10691  | <i>GMEB1</i>     | 4.42e-03 |
| 228486_at    | 23446  | <i>SLC44A1</i>   | 4.42e-03 |

|             |        |                  |          |
|-------------|--------|------------------|----------|
| 243206_at   | 90799  | <i>CEP95</i>     | 4.42e-03 |
| 231108_at   | 2521   | <i>FUS</i>       | 4.43e-03 |
| 202738_s_at | 5257   | <i>PHKB</i>      | 4.43e-03 |
| 203655_at   | 7515   | <i>XRCC1</i>     | 4.43e-03 |
| 212511_at   | 8301   | <i>PICALM</i>    | 4.43e-03 |
| 209210_s_at | 10979  | <i>FERMT2</i>    | 4.43e-03 |
| 222607_s_at | 22894  | <i>DIS3</i>      | 4.44e-03 |
| 242851_at   | 91749  | <i>KIAA1919</i>  | 4.44e-03 |
| 220298_s_at | 54558  | <i>SPATA6</i>    | 4.45e-03 |
| 218040_at   | 55119  | <i>PRPF38B</i>   | 4.45e-03 |
| 231321_s_at | 55331  | <i>ACER3</i>     | 4.45e-03 |
| 201113_at   | 7284   | <i>TUFM</i>      | 4.46e-03 |
| 203262_s_at | 9130   | <i>FAM50A</i>    | 4.46e-03 |
| 227704_at   | 83636  | <i>C19orf12</i>  | 4.46e-03 |
| 227363_s_at | 10328  | <i>EMC8</i>      | 4.47e-03 |
| 212202_s_at | 25963  | <i>TMEM87A</i>   | 4.47e-03 |
| 227268_at   | 51136  | <i>RNFT1</i>     | 4.47e-03 |
| 206567_s_at | 51230  | <i>PHF20</i>     | 4.47e-03 |
| 200092_s_at | 6167   | <i>RPL37</i>     | 4.48e-03 |
| 238430_x_at | 162394 | <i>SLFN5</i>     | 4.49e-03 |
| 201299_s_at | 55233  | <i>MOB1A</i>     | 4.51e-03 |
| 207120_at   | 63934  | <i>ZNF667</i>    | 4.51e-03 |
| 203588_s_at | 7029   | <i>TFDP2</i>     | 4.52e-03 |
| 215146_s_at | 23331  | <i>TTC28</i>     | 4.52e-03 |
| 228577_x_at | 57489  | <i>ODF2L</i>     | 4.53e-03 |
| 230136_at   | 400099 | <i>LOC400099</i> | 4.53e-03 |
| 235766_x_at | 5873   | <i>RAB27A</i>    | 4.54e-03 |
| 209161_at   | 9128   | <i>PRPF4</i>     | 4.54e-03 |
| 209455_at   | 23291  | <i>FBXW11</i>    | 4.54e-03 |
| 243612_at   | 64324  | <i>NSD1</i>      | 4.54e-03 |
| 204386_s_at | 78988  | <i>MRP63</i>     | 4.54e-03 |
| 233724_at   | 405    | <i>ARNT</i>      | 4.55e-03 |
| 231927_at   | 22926  | <i>ATF6</i>      | 4.55e-03 |
| 209273_s_at | 81689  | <i>ISCA1</i>     | 4.55e-03 |
| 226073_at   | 219854 | <i>TMEM218</i>   | 4.55e-03 |
| 209362_at   | 9412   | <i>MED21</i>     | 4.56e-03 |
| 203833_s_at | 10618  | <i>TGOLN2</i>    | 4.56e-03 |
| 226025_at   | 23243  | <i>ANKRD28</i>   | 4.56e-03 |
| 218728_s_at | 29097  | <i>CNIH4</i>     | 4.56e-03 |
| 213237_at   | 400506 | <i>C16orf88</i>  | 4.56e-03 |

|              |        |                 |          |
|--------------|--------|-----------------|----------|
| 242617_at    | 283578 | <i>TMED8</i>    | 4.57e-03 |
| 208940_at    | 22929  | <i>SEPHS1</i>   | 4.58e-03 |
| 224702_at    | 153339 | <i>TMEM167A</i> | 4.59e-03 |
| 204526_s_at  | 11138  | <i>TBC1D8</i>   | 4.60e-03 |
| 203345_s_at  | 22823  | <i>MTF2</i>     | 4.60e-03 |
| 1569543_at   | 6251   | <i>RSU1</i>     | 4.62e-03 |
| 222909_s_at  | 9530   | <i>BAG4</i>     | 4.62e-03 |
| 202629_at    | 10513  | <i>APPBP2</i>   | 4.62e-03 |
| 232865_at    | 27125  | <i>AFF4</i>     | 4.62e-03 |
| 221883_at    | 5316   | <i>PKNOX1</i>   | 4.63e-03 |
| 232266_x_at  | 8621   | <i>CDK13</i>    | 4.63e-03 |
| 203597_s_at  | 11193  | <i>WBP4</i>     | 4.63e-03 |
| 228348_at    | 55180  | <i>LINS</i>     | 4.63e-03 |
| 1570210_x_at | 9701   | <i>PPP6R2</i>   | 4.64e-03 |
| 212589_at    | 22800  | <i>RRAS2</i>    | 4.64e-03 |
| 212026_s_at  | 23265  | <i>EXOC7</i>    | 4.64e-03 |
| 221702_s_at  | 80213  | <i>TM2D3</i>    | 4.66e-03 |
| 221953_s_at  | 10893  | <i>MMP24</i>    | 4.67e-03 |
| 209036_s_at  | 4191   | <i>MDH2</i>     | 4.68e-03 |
| 205887_x_at  | 4437   | <i>MSH3</i>     | 4.68e-03 |
| 242622_x_at  | 5728   | <i>PTEN</i>     | 4.68e-03 |
| 1556060_a_at | 26036  | <i>ZNF451</i>   | 4.69e-03 |
| 221647_s_at  | 60626  | <i>RIC8A</i>    | 4.69e-03 |
| 212208_at    | 23389  | <i>MED13L</i>   | 4.70e-03 |
| 206519_x_at  | 946    | <i>SIGLEC6</i>  | 4.71e-03 |
| 201324_at    | 2012   | <i>EMP1</i>     | 4.72e-03 |
| 208929_x_at  | 6137   | <i>RPL13</i>    | 4.72e-03 |
| 204367_at    | 6668   | <i>SP2</i>      | 4.72e-03 |
| 225153_at    | 85476  | <i>GFMI</i>     | 4.73e-03 |
| 208974_x_at  | 3837   | <i>KPNB1</i>    | 4.74e-03 |
| 212920_at    | 5978   | <i>REST</i>     | 4.74e-03 |
| 211034_s_at  | 283450 | <i>HECTD4</i>   | 4.74e-03 |
| 227105_at    | 79848  | <i>CSPP1</i>    | 4.75e-03 |
| 204203_at    | 1054   | <i>CEBPG</i>    | 4.76e-03 |
| 211036_x_at  | 51433  | <i>ANAPC5</i>   | 4.76e-03 |
| 224163_s_at  | 55929  | <i>DMAPI</i>    | 4.76e-03 |
| 218618_s_at  | 64778  | <i>FNDC3B</i>   | 4.76e-03 |
| 230320_at    | 84897  | <i>TBRG1</i>    | 4.76e-03 |
| 230250_at    | 5787   | <i>PTPRB</i>    | 4.77e-03 |
| 200686_s_at  | 9295   | <i>SRSF11</i>   | 4.77e-03 |

|              |        |                  |          |
|--------------|--------|------------------|----------|
| 202300_at    | 10542  | <i>HBXIP</i>     | 4.77e-03 |
| 243631_at    | 54737  | <i>MPHOSPH8</i>  | 4.77e-03 |
| 204352_at    | 7188   | <i>TRAF5</i>     | 4.78e-03 |
| 242750_at    | 166785 | <i>MMAA</i>      | 4.78e-03 |
| 201472_at    | 7411   | <i>VBPI</i>      | 4.79e-03 |
| 228603_at    | 10096  | <i>ACTR3</i>     | 4.79e-03 |
| 212082_s_at  | 4637   | <i>MYL6</i>      | 4.80e-03 |
| 211747_s_at  | 23658  | <i>LSM5</i>      | 4.81e-03 |
| 225395_s_at  | 158293 | <i>FAM120AOS</i> | 4.81e-03 |
| 205395_s_at  | 4361   | <i>MRE11A</i>    | 4.82e-03 |
| 1555864_s_at | 5160   | <i>PDHA1</i>     | 4.82e-03 |
| 208117_s_at  | 81887  | <i>LAS1L</i>     | 4.82e-03 |
| 231735_s_at  | 378938 | <i>MALAT1</i>    | 4.82e-03 |
| 1563321_s_at | 8028   | <i>MLLT10</i>    | 4.83e-03 |
| 203653_s_at  | 8161   | <i>COIL</i>      | 4.83e-03 |
| 244132_x_at  | 9849   | <i>ZNF518A</i>   | 4.83e-03 |
| 226327_at    | 22847  | <i>ZNF507</i>    | 4.83e-03 |
| 227551_at    | 51104  | <i>FAM108B1</i>  | 4.83e-03 |
| 201478_s_at  | 1736   | <i>DKC1</i>      | 4.84e-03 |
| 208174_x_at  | 8233   | <i>ZRSR2</i>     | 4.84e-03 |
| 236006_s_at  | 11216  | <i>AKAP10</i>    | 4.84e-03 |
| 218415_at    | 26276  | <i>VPS33B</i>    | 4.85e-03 |
| 214600_at    | 7003   | <i>TEAD1</i>     | 4.86e-03 |
| 203856_at    | 7443   | <i>VRK1</i>      | 4.86e-03 |
| 206497_at    | 55744  | <i>COA1</i>      | 4.86e-03 |
| 228916_at    | 143884 | <i>CWF19L2</i>   | 4.86e-03 |
| 202288_at    | 2475   | <i>MTOR</i>      | 4.88e-03 |
| 206565_x_at  | 11039  | <i>SMA4</i>      | 4.88e-03 |
| 220890_s_at  | 51202  | <i>DDX47</i>     | 4.88e-03 |
| 230069_at    | 94081  | <i>SFXN1</i>     | 4.89e-03 |
| 203401_at    | 5634   | <i>PRPS2</i>     | 4.90e-03 |
| 220939_s_at  | 54878  | <i>DPP8</i>      | 4.90e-03 |
| 221311_x_at  | 57226  | <i>LYRM2</i>     | 4.90e-03 |
| 1569157_s_at | 162993 | <i>ZNF846</i>    | 4.91e-03 |
| 214882_s_at  | 6427   | <i>SRSF2</i>     | 4.93e-03 |
| 203182_s_at  | 6733   | <i>SRPK2</i>     | 4.93e-03 |
| 224711_at    | 7528   | <i>YY1</i>       | 4.93e-03 |
| 205356_at    | 8975   | <i>USP13</i>     | 4.93e-03 |
| 227836_at    | 84294  | <i>UTP23</i>     | 4.93e-03 |
| 218515_at    | 94104  | <i>GCFC1</i>     | 4.93e-03 |

|              |        |                 |          |
|--------------|--------|-----------------|----------|
| 204366_s_at  | 2976   | <i>GTF3C2</i>   | 4.94e-03 |
| 204308_s_at  | 9895   | <i>TECPR2</i>   | 4.94e-03 |
| 218256_s_at  | 53371  | <i>NUP54</i>    | 4.95e-03 |
| 240926_at    | 84859  | <i>LRCH3</i>    | 4.95e-03 |
| 239364_at    | 2120   | <i>ETV6</i>     | 4.96e-03 |
| 208642_s_at  | 7520   | <i>XRCC5</i>    | 4.96e-03 |
| 204844_at    | 2028   | <i>ENPEP</i>    | 4.97e-03 |
| 213399_x_at  | 6185   | <i>RPN2</i>     | 4.97e-03 |
| 218418_s_at  | 25959  | <i>KANK2</i>    | 4.97e-03 |
| 221090_s_at  | 55239  | <i>OGFOD1</i>   | 4.97e-03 |
| 205003_at    | 9732   | <i>DOCK4</i>    | 4.98e-03 |
| 1558331_at   | 22933  | <i>SIRT2</i>    | 4.98e-03 |
| 210094_s_at  | 56288  | <i>PARD3</i>    | 4.98e-03 |
| 225126_at    | 92399  | <i>MRRF</i>     | 4.99e-03 |
| 222494_at    | 1112   | <i>FOXN3</i>    | 5.00e-03 |
| 219336_s_at  | 51008  | <i>ASCC1</i>    | 5.00e-03 |
| 203225_s_at  | 55312  | <i>RFK</i>      | 5.00e-03 |
| 203481_at    | 55719  | <i>FAM178A</i>  | 5.00e-03 |
| 229235_at    | 84901  | <i>NFATC2IP</i> | 5.00e-03 |
| 226752_at    | 345757 | <i>FAM174A</i>  | 5.00e-03 |
| 208030_s_at  | 118    | <i>ADD1</i>     | 5.01e-03 |
| 204461_x_at  | 5810   | <i>RAD1</i>     | 5.01e-03 |
| 224029_x_at  | 11280  | <i>SCN11A</i>   | 5.01e-03 |
| 218242_s_at  | 51111  | <i>SUV420H1</i> | 5.01e-03 |
| 216711_s_at  | 6872   | <i>TAF1</i>     | 5.02e-03 |
| 201558_at    | 8480   | <i>RAE1</i>     | 5.02e-03 |
| 207791_s_at  | 5861   | <i>RAB1A</i>    | 5.03e-03 |
| 223283_s_at  | 10194  | <i>TSHZ1</i>    | 5.03e-03 |
| 242470_at    | 126272 | <i>EID2B</i>    | 5.03e-03 |
| 208662_s_at  | 7267   | <i>TTC3</i>     | 5.04e-03 |
| 222753_s_at  | 60559  | <i>SPCS3</i>    | 5.04e-03 |
| 226021_at    | 157506 | <i>RDH10</i>    | 5.05e-03 |
| 226896_at    | 118487 | <i>CHCHD1</i>   | 5.06e-03 |
| 203704_s_at  | 6239   | <i>RREB1</i>    | 5.07e-03 |
| 218739_at    | 51099  | <i>ABHD5</i>    | 5.09e-03 |
| 50400_at     | 196743 | <i>PAOX</i>     | 5.09e-03 |
| 238005_s_at  | 25942  | <i>SIN3A</i>    | 5.10e-03 |
| 220741_s_at  | 27068  | <i>PPA2</i>     | 5.11e-03 |
| 233632_s_at  | 54464  | <i>XRN1</i>     | 5.11e-03 |
| 1558560_s_at | 8548   | <i>BLZF1</i>    | 5.12e-03 |



|              |        |                 |          |
|--------------|--------|-----------------|----------|
| 201779_s_at  | 11342  | <i>RNF13</i>    | 5.12e-03 |
| 239247_at    | 401577 | <i>CD99P1</i>   | 5.12e-03 |
| 222627_at    | 51542  | <i>VPS54</i>    | 5.13e-03 |
| 202530_at    | 1432   | <i>MAPK14</i>   | 5.14e-03 |
| 202930_s_at  | 8803   | <i>SUCLA2</i>   | 5.14e-03 |
| 224586_x_at  | 10923  | <i>SUB1</i>     | 5.14e-03 |
| 1552633_at   | 94039  | <i>ZNF101</i>   | 5.14e-03 |
| 227370_at    | 165215 | <i>FAM171B</i>  | 5.14e-03 |
| 221858_at    | 23232  | <i>TBC1D12</i>  | 5.15e-03 |
| 219220_x_at  | 56945  | <i>MRPS22</i>   | 5.15e-03 |
| 204860_s_at  | 4671   | <i>NAIP</i>     | 5.16e-03 |
| 224985_at    | 4893   | <i>NRAS</i>     | 5.16e-03 |
| 226370_at    | 80311  | <i>KLHL15</i>   | 5.16e-03 |
| 201546_at    | 9320   | <i>TRIP12</i>   | 5.17e-03 |
| 202349_at    | 1861   | <i>TORIA</i>    | 5.19e-03 |
| 229453_at    | 2923   | <i>PDIA3</i>    | 5.19e-03 |
| 235692_at    | 30011  | <i>SH3KBP1</i>  | 5.19e-03 |
| 219110_at    | 54433  | <i>GAR1</i>     | 5.19e-03 |
| 202049_s_at  | 9202   | <i>ZMYM4</i>    | 5.20e-03 |
| 219375_at    | 10390  | <i>CEPT1</i>    | 5.21e-03 |
| 1555446_s_at | 7109   | <i>TRAPPC10</i> | 5.22e-03 |
| 235353_at    | 23231  | <i>SELIL3</i>   | 5.22e-03 |
| 213092_x_at  | 23234  | <i>DNAJC9</i>   | 5.22e-03 |
| 211445_x_at  | 83955  | <i>NACAP1</i>   | 5.22e-03 |
| 225760_at    | 114803 | <i>MYSM1</i>    | 5.22e-03 |
| 228185_at    | 219749 | <i>ZNF25</i>    | 5.23e-03 |
| 233480_at    | 79188  | <i>TMEM43</i>   | 5.24e-03 |
| 228005_at    | 158586 | <i>ZXDB</i>     | 5.24e-03 |
| 208696_at    | 22948  | <i>CCT5</i>     | 5.25e-03 |
| 1568619_s_at | 162073 | <i>ITPRIPL2</i> | 5.25e-03 |
| 223993_s_at  | 29097  | <i>CNIH4</i>    | 5.26e-03 |
| 217820_s_at  | 55740  | <i>ENAH</i>     | 5.26e-03 |
| 225950_at    | 142891 | <i>SAMD8</i>    | 5.26e-03 |
| 212959_s_at  | 79158  | <i>GNPTAB</i>   | 5.27e-03 |
| 208054_at    | 26091  | <i>HERC4</i>    | 5.28e-03 |
| 228032_s_at  | 163486 | <i>DENND1B</i>  | 5.28e-03 |
| 203078_at    | 8453   | <i>CUL2</i>     | 5.30e-03 |
| 222550_at    | 55156  | <i>ARMC1</i>    | 5.30e-03 |
| 1555882_at   | 169981 | <i>SPIN3</i>    | 5.30e-03 |
| 201955_at    | 892    | <i>CCNC</i>     | 5.31e-03 |

|             |        |                  |          |
|-------------|--------|------------------|----------|
| 202512_s_at | 9474   | <i>ATG5</i>      | 5.31e-03 |
| 226837_at   | 161742 | <i>SPRED1</i>    | 5.31e-03 |
| 207115_x_at | 54799  | <i>MBTD1</i>     | 5.32e-03 |
| 201648_at   | 3716   | <i>JAK1</i>      | 5.33e-03 |
| 207040_s_at | 6767   | <i>ST13</i>      | 5.33e-03 |
| 1564276_at  | 441108 | <i>C5orf56</i>   | 5.33e-03 |
| 209252_at   | 23438  | <i>HARS2</i>     | 5.35e-03 |
| 217952_x_at | 23469  | <i>PHF3</i>      | 5.35e-03 |
| 222825_at   | 51633  | <i>OTUD6B</i>    | 5.35e-03 |
| 232048_at   | 143684 | <i>FAM76B</i>    | 5.35e-03 |
| 236124_at   | 153546 | <i>LOC153546</i> | 5.35e-03 |
| 223034_s_at | 25912  | <i>C1orf43</i>   | 5.37e-03 |
| 206571_s_at | 9448   | <i>MAP4K4</i>    | 5.38e-03 |
| 223915_at   | 54880  | <i>BCOR</i>      | 5.38e-03 |
| 218210_at   | 79672  | <i>FN3KRP</i>    | 5.38e-03 |
| 225957_at   | 153222 | <i>CREBRF</i>    | 5.38e-03 |
| 223175_s_at | 55527  | <i>FEM1A</i>     | 5.40e-03 |
| 231940_at   | 57711  | <i>ZNF529</i>    | 5.40e-03 |
| 218979_at   | 80010  | <i>RM11</i>      | 5.40e-03 |
| 225807_at   | 84962  | <i>AJUBA</i>     | 5.40e-03 |
| 208820_at   | 5747   | <i>PTK2</i>      | 5.42e-03 |
| 214864_s_at | 9380   | <i>GRHPR</i>     | 5.42e-03 |
| 225662_at   | 51776  | <i>ZAK</i>       | 5.42e-03 |
| 225413_at   | 84833  | <i>USMG5</i>     | 5.42e-03 |
| 225297_at   | 115106 | <i>HAUS1</i>     | 5.42e-03 |
| 208966_x_at | 3428   | <i>IFI16</i>     | 5.43e-03 |
| 225476_at   | 7918   | <i>GPANK1</i>    | 5.43e-03 |
| 223115_at   | 9440   | <i>MED17</i>     | 5.43e-03 |
| 220690_s_at | 25979  | <i>DHRS7B</i>    | 5.43e-03 |
| 218089_at   | 25980  | <i>AAR2</i>      | 5.43e-03 |
| 221263_s_at | 83443  | <i>SF3B5</i>     | 5.43e-03 |
| 237784_at   | 10923  | <i>SUB1</i>      | 5.44e-03 |
| 227352_at   | 126074 | <i>SWSAP1</i>    | 5.44e-03 |
| 209788_s_at | 51752  | <i>ERAP1</i>     | 5.46e-03 |
| 228141_at   | 493869 | <i>GPX8</i>      | 5.47e-03 |
| 201366_at   | 310    | <i>ANXA7</i>     | 5.48e-03 |
| 209444_at   | 5910   | <i>RAP1GDS1</i>  | 5.48e-03 |
| 212846_at   | 23076  | <i>RRP1B</i>     | 5.48e-03 |
| 200020_at   | 23435  | <i>TARDBP</i>    | 5.48e-03 |
| 223591_at   | 84282  | <i>RNF135</i>    | 5.48e-03 |

|             |           |                 |          |
|-------------|-----------|-----------------|----------|
| 235365_at   | 494513    | <i>DFNB59</i>   | 5.48e-03 |
| 202202_s_at | 3910      | <i>LAMA4</i>    | 5.49e-03 |
| 232860_x_at | 55285     | <i>RBM41</i>    | 5.49e-03 |
| 202100_at   | 5899      | <i>RALB</i>     | 5.51e-03 |
| 224315_at   | 11218     | <i>DDX20</i>    | 5.51e-03 |
| 209187_at   | 1810      | <i>DR1</i>      | 5.52e-03 |
| 212893_at   | 26009     | <i>ZZZ3</i>     | 5.52e-03 |
| 213773_x_at | 55695     | <i>NSUN5</i>    | 5.52e-03 |
| 223697_x_at | 84267     | <i>C9orf64</i>  | 5.52e-03 |
| 214092_x_at | 10147     | <i>SUGP2</i>    | 5.53e-03 |
| 212222_at   | 23198     | <i>PSME4</i>    | 5.53e-03 |
| 224704_at   | 27327     | <i>TNRC6A</i>   | 5.54e-03 |
| 211710_x_at | 6124      | <i>RPL4</i>     | 5.55e-03 |
| 223128_at   | 55572     | <i>FOXRED1</i>  | 5.55e-03 |
| 219523_s_at | 55714     | <i>ODZ3</i>     | 5.55e-03 |
| 203595_s_at | 24138     | <i>IFIT5</i>    | 5.56e-03 |
| 208895_s_at | 8886      | <i>DDX18</i>    | 5.57e-03 |
| 223619_x_at | 55825     | <i>PECR</i>     | 5.57e-03 |
| 204084_s_at | 1203      | <i>CLN5</i>     | 5.58e-03 |
| 200685_at   | 9295      | <i>SRSF11</i>   | 5.58e-03 |
| 218799_at   | 54707     | <i>GPN2</i>     | 5.58e-03 |
| 223402_at   | 54935     | <i>DUSP23</i>   | 5.58e-03 |
| 226312_at   | 253260    | <i>RICTOR</i>   | 5.58e-03 |
| 238121_at   | 256356    | <i>GK5</i>      | 5.58e-03 |
| 204605_at   | 10668     | <i>CGRRF1</i>   | 5.59e-03 |
| 203278_s_at | 51317     | <i>PHF21A</i>   | 5.60e-03 |
| 235381_at   | 51773     | <i>RSF1</i>     | 5.60e-03 |
| 1553099_at  | 200765    | <i>TIGD1</i>    | 5.60e-03 |
| 208919_s_at | 65220     | <i>NADK</i>     | 5.61e-03 |
| 225946_at   | 11228     | <i>RASSF8</i>   | 5.62e-03 |
| 227322_s_at | 56647     | <i>BCCIP</i>    | 5.62e-03 |
| 228709_at   | 7175      | <i>TPR</i>      | 5.63e-03 |
| 236262_at   | 79812     | <i>MMRN2</i>    | 5.63e-03 |
| 225210_s_at | 83640     | <i>FAM103A1</i> | 5.64e-03 |
| 213127_s_at | 112950    | <i>MED8</i>     | 5.65e-03 |
| 209628_at   | 55916     | <i>NXT2</i>     | 5.66e-03 |
| 235623_at   | 55250     | <i>ELP2</i>     | 5.67e-03 |
| 224972_at   | 140823    | <i>ROMO1</i>    | 5.68e-03 |
| 226544_x_at | 63915     | <i>BLOC1S5</i>  | 5.69e-03 |
| 228543_at   | 100303755 | <i>PET117</i>   | 5.70e-03 |

|              |           |                     |          |
|--------------|-----------|---------------------|----------|
| 225554_s_at  | 51434     | <i>ANAPC7</i>       | 5.71e-03 |
| 219363_s_at  | 51001     | <i>MTERFD1</i>      | 5.72e-03 |
| 59999_at     | 55662     | <i>HIF1AN</i>       | 5.72e-03 |
| 202031_s_at  | 26100     | <i>WIPI2</i>        | 5.73e-03 |
| 231995_at    | 79886     | <i>CAAP1</i>        | 5.73e-03 |
| 239138_at    | 80218     | <i>NAA50</i>        | 5.73e-03 |
| 203374_s_at  | 7174      | <i>TPP2</i>         | 5.74e-03 |
| 217837_s_at  | 51652     | <i>CHMP3</i>        | 5.75e-03 |
| 219587_at    | 54970     | <i>TTC12</i>        | 5.75e-03 |
| 227607_at    | 57559     | <i>STAMBPL1</i>     | 5.75e-03 |
| 200031_s_at  | 6205      | <i>RPS11</i>        | 5.76e-03 |
| 224894_at    | 10413     | <i>YAP1</i>         | 5.76e-03 |
| 214323_s_at  | 65110     | <i>UPF3A</i>        | 5.76e-03 |
| 204417_at    | 2581      | <i>GALC</i>         | 5.77e-03 |
| 1558201_s_at | 22950     | <i>SLC4A1AP</i>     | 5.78e-03 |
| 235719_at    | 285440    | <i>CYP4V2</i>       | 5.78e-03 |
| 225522_at    | 22848     | <i>AAK1</i>         | 5.79e-03 |
| 223766_at    | 100133130 | <i>LOC100133130</i> | 5.79e-03 |
| 228157_at    | 7756      | <i>ZNF207</i>       | 5.80e-03 |
| 209139_s_at  | 8575      | <i>PRKRA</i>        | 5.80e-03 |
| 217822_at    | 51729     | <i>WBP11</i>        | 5.80e-03 |
| 228328_at    | 54813     | <i>KLHL28</i>       | 5.80e-03 |
| 226998_at    | 80155     | <i>NAA15</i>        | 5.80e-03 |
| 212287_at    | 23512     | <i>SUZ12</i>        | 5.81e-03 |
| 227152_at    | 55196     | <i>KIAA1551</i>     | 5.81e-03 |
| 227141_at    | 127253    | <i>TYW3</i>         | 5.82e-03 |
| 217650_x_at  | 6483      | <i>ST3GAL2</i>      | 5.83e-03 |
| 228574_at    | 160335    | <i>TMTC2</i>        | 5.83e-03 |
| 201338_x_at  | 2971      | <i>GTF3A</i>        | 5.84e-03 |
| 225336_at    | 9169      | <i>SCAF11</i>       | 5.84e-03 |
| 232366_at    | 9778      | <i>KIAA0232</i>     | 5.84e-03 |
| 209493_at    | 23037     | <i>PDZD2</i>        | 5.84e-03 |
| 213364_s_at  | 6642      | <i>SNX1</i>         | 5.85e-03 |
| 215493_x_at  | 11120     | <i>BTN2A1</i>       | 5.85e-03 |
| 203334_at    | 1659      | <i>DHX8</i>         | 5.86e-03 |
| 225243_s_at  | 7871      | <i>SLMAP</i>        | 5.86e-03 |
| 224437_s_at  | 51534     | <i>VTA1</i>         | 5.86e-03 |
| 218462_at    | 80135     | <i>RPF1</i>         | 5.87e-03 |
| 209476_at    | 81542     | <i>TMX1</i>         | 5.87e-03 |
| 212813_at    | 83700     | <i>JAM3</i>         | 5.89e-03 |

|             |           |                 |          |
|-------------|-----------|-----------------|----------|
| 243807_at   | 135112    | <i>NCOA7</i>    | 5.89e-03 |
| 223066_at   | 23557     | <i>SNAPIN</i>   | 5.90e-03 |
| 218672_at   | 79005     | <i>SCNMI</i>    | 5.90e-03 |
| 206918_s_at | 8904      | <i>CPNE1</i>    | 5.91e-03 |
| 232097_at   | 9878      | <i>TOX4</i>     | 5.92e-03 |
| 201560_at   | 25932     | <i>CLIC4</i>    | 5.92e-03 |
| 227916_x_at | 51010     | <i>EXOSC3</i>   | 5.92e-03 |
| 228283_at   | 152100    | <i>CMC1</i>     | 5.92e-03 |
| 213329_at   | 23380     | <i>SRGAP2</i>   | 5.93e-03 |
| 227029_at   | 283635    | <i>FAM177A1</i> | 5.93e-03 |
| 226024_at   | 150684    | <i>COMMD1</i>   | 5.94e-03 |
| 225381_at   | 399959    | <i>MIR100HG</i> | 5.94e-03 |
| 202191_s_at | 8522      | <i>GAS7</i>     | 5.95e-03 |
| 229871_at   | 55095     | <i>SAMD4B</i>   | 5.95e-03 |
| 223004_s_at | 51300     | <i>TIMMDC1</i>  | 5.97e-03 |
| 201386_s_at | 1665      | <i>DHX15</i>    | 5.98e-03 |
| 202703_at   | 8446      | <i>DUSP11</i>   | 5.98e-03 |
| 202697_at   | 11051     | <i>NUDT21</i>   | 5.98e-03 |
| 201881_s_at | 25820     | <i>ARIH1</i>    | 5.98e-03 |
| 244881_at   | 89782     | <i>LMLN</i>     | 5.98e-03 |
| 225427_s_at | 128240    | <i>APOA1BP</i>  | 5.98e-03 |
| 200949_x_at | 6224      | <i>RPS20</i>    | 5.99e-03 |
| 212111_at   | 23673     | <i>STX12</i>    | 5.99e-03 |
| 220408_x_at | 55578     | <i>FAM48A</i>   | 5.99e-03 |
| 224352_s_at | 1073      | <i>CFL2</i>     | 6.00e-03 |
| 226701_at   | 2702      | <i>GJA5</i>     | 6.01e-03 |
| 218568_at   | 55750     | <i>AGK</i>      | 6.02e-03 |
| 212758_s_at | 6935      | <i>ZEB1</i>     | 6.04e-03 |
| 218398_at   | 10884     | <i>MRPS30</i>   | 6.04e-03 |
| 218721_s_at | 54953     | <i>C1orf27</i>  | 6.04e-03 |
| 224666_at   | 197370    | <i>NSMCE1</i>   | 6.04e-03 |
| 210908_s_at | 5204      | <i>PFDN5</i>    | 6.05e-03 |
| 211578_s_at | 6198      | <i>RPS6KB1</i>  | 6.05e-03 |
| 201653_at   | 10175     | <i>CNIH</i>     | 6.05e-03 |
| 222437_s_at | 51652     | <i>CHMP3</i>    | 6.05e-03 |
| 212248_at   | 92140     | <i>MTDH</i>     | 6.05e-03 |
| 243092_at   | 100288730 | <i>PAN3-AS1</i> | 6.05e-03 |
| 203053_at   | 10286     | <i>BCAS2</i>    | 6.06e-03 |
| 225878_at   | 23095     | <i>KIF1B</i>    | 6.06e-03 |
| 208923_at   | 23191     | <i>CYFIP1</i>   | 6.06e-03 |

|              |        |                  |          |
|--------------|--------|------------------|----------|
| 225099_at    | 200933 | <i>FBXO45</i>    | 6.06e-03 |
| 221860_at    | 3191   | <i>HNRNPL</i>    | 6.07e-03 |
| 202927_at    | 5300   | <i>PINI</i>      | 6.07e-03 |
| 208103_s_at  | 81611  | <i>ANP32E</i>    | 6.07e-03 |
| 213747_at    | 51582  | <i>AZIN1</i>     | 6.08e-03 |
| 202749_at    | 7485   | <i>WRB</i>       | 6.09e-03 |
| 231968_at    | 56886  | <i>UGGT1</i>     | 6.09e-03 |
| 218496_at    | 246243 | <i>RNASEH1</i>   | 6.09e-03 |
| 204422_s_at  | 2247   | <i>FGF2</i>      | 6.11e-03 |
| 202549_at    | 9217   | <i>VAPB</i>      | 6.11e-03 |
| 214004_s_at  | 9686   | <i>VGLL4</i>     | 6.11e-03 |
| 225268_at    | 3840   | <i>KPNA4</i>     | 6.12e-03 |
| 238070_at    | 9557   | <i>CHD1L</i>     | 6.12e-03 |
| 1554456_a_at | 55180  | <i>LINS</i>      | 6.12e-03 |
| 221987_s_at  | 55720  | <i>TSRI</i>      | 6.12e-03 |
| 235096_at    | 123169 | <i>LEO1</i>      | 6.12e-03 |
| 213605_s_at  | 728093 | <i>LOC728093</i> | 6.12e-03 |
| 220669_at    | 54726  | <i>OTUD4</i>     | 6.13e-03 |
| 214394_x_at  | 1936   | <i>EEF1D</i>     | 6.14e-03 |
| 214214_s_at  | 708    | <i>C1QBP</i>     | 6.15e-03 |
| 218249_at    | 64429  | <i>ZDHHC6</i>    | 6.15e-03 |
| 231850_x_at  | 80817  | <i>CEP44</i>     | 6.15e-03 |
| 236390_at    | 128710 | <i>C20orf94</i>  | 6.16e-03 |
| 224649_x_at  | 219771 | <i>CCNY</i>      | 6.16e-03 |
| 1558076_at   | 84250  | <i>ANKRD32</i>   | 6.17e-03 |
| 235324_at    | 6428   | <i>SRSF3</i>     | 6.18e-03 |
| 201635_s_at  | 8087   | <i>FXR1</i>      | 6.18e-03 |
| 202258_s_at  | 10443  | <i>N4BP2L2</i>   | 6.18e-03 |
| 209248_at    | 27069  | <i>GHITM</i>     | 6.18e-03 |
| 224958_at    | 57532  | <i>NUFIP2</i>    | 6.18e-03 |
| 1570523_s_at | 83734  | <i>ATG10</i>     | 6.18e-03 |
| 229060_at    | 388403 | <i>YPEL2</i>     | 6.19e-03 |
| 202013_s_at  | 2132   | <i>EXT2</i>      | 6.20e-03 |
| 226367_at    | 5927   | <i>KDM5A</i>     | 6.20e-03 |
| 220924_s_at  | 54407  | <i>SLC38A2</i>   | 6.20e-03 |
| 207335_x_at  | 521    | <i>ATP5I</i>     | 6.21e-03 |
| 218432_at    | 26273  | <i>FBXO3</i>     | 6.21e-03 |
| 218446_s_at  | 51030  | <i>FAM18B1</i>   | 6.21e-03 |
| 1556277_a_at | 167153 | <i>PAPD4</i>     | 6.21e-03 |
| 238653_at    | 9860   | <i>LRIG2</i>     | 6.22e-03 |

|              |           |                     |          |
|--------------|-----------|---------------------|----------|
| 215418_at    | 55742     | <i>PARVA</i>        | 6.22e-03 |
| 223486_at    | 29083     | <i>GTPBP8</i>       | 6.24e-03 |
| 225657_at    | 152217    | <i>LOC152217</i>    | 6.24e-03 |
| 225169_at    | 92105     | <i>INTS4</i>        | 6.25e-03 |
| 228867_at    | 128387    | <i>TATDN3</i>       | 6.25e-03 |
| 1561615_s_at | 6546      | <i>SLC8A1</i>       | 6.26e-03 |
| 203971_at    | 1317      | <i>SLC31A1</i>      | 6.29e-03 |
| 238447_at    | 27303     | <i>RBMS3</i>        | 6.29e-03 |
| 225637_at    | 54849     | <i>DEF8</i>         | 6.29e-03 |
| 1556827_at   | 339929    | <i>LPP-AS2</i>      | 6.29e-03 |
| 214807_at    | 100509635 | <i>LOC100509635</i> | 6.29e-03 |
| 225462_at    | 85013     | <i>TMEM128</i>      | 6.30e-03 |
| 202767_at    | 53        | <i>ACP2</i>         | 6.31e-03 |
| 1554507_at   | 10003     | <i>NAALAD2</i>      | 6.32e-03 |
| 203801_at    | 63931     | <i>MRPS14</i>       | 6.32e-03 |
| 215160_x_at  | 642236    | <i>LOC642236</i>    | 6.32e-03 |
| 209122_at    | 123       | <i>PLIN2</i>        | 6.33e-03 |
| 212062_at    | 10079     | <i>ATP9A</i>        | 6.34e-03 |
| 226383_at    | 120534    | <i>ARL14EP</i>      | 6.34e-03 |
| 226910_at    | 51122     | <i>COMMD2</i>       | 6.35e-03 |
| 223513_at    | 55835     | <i>CENPJ</i>        | 6.35e-03 |
| 226582_at    | 400043    | <i>LOC400043</i>    | 6.35e-03 |
| 1559045_at   | 100128288 | <i>LOC100128288</i> | 6.35e-03 |
| 210214_s_at  | 659       | <i>BMPR2</i>        | 6.37e-03 |
| 224217_s_at  | 11124     | <i>FAF1</i>         | 6.37e-03 |
| 34764_at     | 23395     | <i>LARS2</i>        | 6.38e-03 |
| 222728_s_at  | 79101     | <i>TAF1D</i>        | 6.39e-03 |
| 225270_at    | 4756      | <i>NEO1</i>         | 6.40e-03 |
| 231235_at    | 4820      | <i>NKTR</i>         | 6.40e-03 |
| 221739_at    | 56005     | <i>C19orf10</i>     | 6.40e-03 |
| 226575_at    | 58499     | <i>ZNF462</i>       | 6.40e-03 |
| 209363_s_at  | 9412      | <i>MED21</i>        | 6.41e-03 |
| 1558346_at   | 10063     | <i>COX17</i>        | 6.41e-03 |
| 210555_s_at  | 4775      | <i>NFATC3</i>       | 6.43e-03 |
| 202844_s_at  | 10928     | <i>RALBP1</i>       | 6.43e-03 |
| 209224_s_at  | 4695      | <i>NDUFA2</i>       | 6.44e-03 |
| 219549_s_at  | 10313     | <i>RTN3</i>         | 6.44e-03 |
| 231193_s_at  | 57551     | <i>TAOK1</i>        | 6.44e-03 |
| 203344_s_at  | 5932      | <i>RBBP8</i>        | 6.45e-03 |
| 218598_at    | 60561     | <i>RINT1</i>        | 6.45e-03 |

---

|              |        |                  |          |
|--------------|--------|------------------|----------|
| 242443_at    | 161436 | <i>EML5</i>      | 6.45e-03 |
| 235056_at    | 2120   | <i>ETV6</i>      | 6.46e-03 |
| 227110_at    | 3183   | <i>HNRNPC</i>    | 6.48e-03 |
| 208663_s_at  | 7267   | <i>TTC3</i>      | 6.48e-03 |
| 231102_at    | 54677  | <i>CROT</i>      | 6.48e-03 |
| 206108_s_at  | 6431   | <i>SRSF6</i>     | 6.49e-03 |
| 215294_s_at  | 6594   | <i>SMARCA1</i>   | 6.49e-03 |
| 214960_at    | 8539   | <i>API5</i>      | 6.49e-03 |
| 235003_at    | 127933 | <i>UHMK1</i>     | 6.51e-03 |
| 242554_at    | 219931 | <i>TPCN2</i>     | 6.51e-03 |
| 201093_x_at  | 6389   | <i>SDHA</i>      | 6.52e-03 |
| 202361_at    | 9632   | <i>SEC24C</i>    | 6.53e-03 |
| 228286_at    | 348654 | <i>GEN1</i>      | 6.53e-03 |
| 223281_s_at  | 1355   | <i>COX15</i>     | 6.54e-03 |
| 238476_at    | 153222 | <i>CREBRF</i>    | 6.54e-03 |
| 1553677_a_at | 261726 | <i>TIPRL</i>     | 6.54e-03 |
| 1557718_at   | 5527   | <i>PPP2R5C</i>   | 6.55e-03 |
| 220419_s_at  | 29761  | <i>USP25</i>     | 6.55e-03 |
| 227923_at    | 85358  | <i>SHANK3</i>    | 6.55e-03 |
| 1553994_at   | 4907   | <i>NT5E</i>      | 6.56e-03 |
| 204566_at    | 8493   | <i>PPM1D</i>     | 6.56e-03 |
| 201732_s_at  | 1182   | <i>CLCN3</i>     | 6.57e-03 |
| 200786_at    | 5695   | <i>PSMB7</i>     | 6.58e-03 |
| 222594_s_at  | 65244  | <i>SPATS2</i>    | 6.58e-03 |
| 225278_at    | 5565   | <i>PRKAB2</i>    | 6.59e-03 |
| 238949_at    | 153830 | <i>RNF145</i>    | 6.59e-03 |
| 202224_at    | 1398   | <i>CRK</i>       | 6.60e-03 |
| 202290_at    | 11333  | <i>PDAP1</i>     | 6.60e-03 |
| 218214_at    | 60673  | <i>C12orf44</i>  | 6.61e-03 |
| 206412_at    | 2241   | <i>FER</i>       | 6.63e-03 |
| 201705_at    | 5713   | <i>PSMD7</i>     | 6.63e-03 |
| 224639_at    | 121665 | <i>SPPL3</i>     | 6.63e-03 |
| 240344_x_at  | 90624  | <i>LYRM7</i>     | 6.64e-03 |
| 231247_s_at  | 727820 | <i>LOC727820</i> | 6.64e-03 |
| 212238_at    | 171023 | <i>ASXL1</i>     | 6.65e-03 |
| 201829_at    | 10276  | <i>NET1</i>      | 6.66e-03 |
| 1552694_at   | 114134 | <i>SLC2A13</i>   | 6.66e-03 |
| 215296_at    | 8476   | <i>CDC42BPA</i>  | 6.67e-03 |
| 212447_at    | 25948  | <i>KBTBD2</i>    | 6.67e-03 |
| 226028_at    | 54538  | <i>ROBO4</i>     | 6.68e-03 |

---



|             |        |                 |          |
|-------------|--------|-----------------|----------|
| 202548_s_at | 8874   | <i>ARHGEF7</i>  | 6.69e-03 |
| 244611_at   | 9969   | <i>MED13</i>    | 6.69e-03 |
| 217802_s_at | 64710  | <i>NUCKS1</i>   | 6.71e-03 |
| 204838_s_at | 27030  | <i>MLH3</i>     | 6.72e-03 |
| 1553672_at  | 55740  | <i>ENAH</i>     | 6.72e-03 |
| 226093_at   | 196513 | <i>DCP1B</i>    | 6.72e-03 |
| 225433_at   | 2957   | <i>GTF2A1</i>   | 6.73e-03 |
| 227947_at   | 9749   | <i>PHACTR2</i>  | 6.74e-03 |
| 221222_s_at | 54964  | <i>C1orf56</i>  | 6.74e-03 |
| 232746_at   | 57007  | <i>CXCR7</i>    | 6.74e-03 |
| 224709_s_at | 56990  | <i>CDC42SE2</i> | 6.75e-03 |
| 237040_at   | 143884 | <i>CWF19L2</i>  | 6.75e-03 |
| 227967_at   | 114791 | <i>TUBGCP5</i>  | 6.76e-03 |
| 228249_at   | 119710 | <i>C11orf74</i> | 6.76e-03 |
| 235556_at   | 153222 | <i>CREBRF</i>   | 6.76e-03 |
| 202816_s_at | 6760   | <i>SS18</i>     | 6.77e-03 |
| 237182_at   | 653479 | <i>MRPL45P2</i> | 6.77e-03 |
| 212024_x_at | 2314   | <i>FLII</i>     | 6.78e-03 |
| 227884_at   | 8148   | <i>TAF15</i>    | 6.78e-03 |
| 210136_at   | 4155   | <i>MBP</i>      | 6.79e-03 |
| 200845_s_at | 9588   | <i>PRDX6</i>    | 6.81e-03 |
| 202203_s_at | 267    | <i>AMFR</i>     | 6.82e-03 |
| 204396_s_at | 2869   | <i>GRK5</i>     | 6.82e-03 |
| 209317_at   | 9533   | <i>POLR1C</i>   | 6.82e-03 |
| 201584_s_at | 10212  | <i>DDX39A</i>   | 6.83e-03 |
| 200876_s_at | 5689   | <i>PSMB1</i>    | 6.84e-03 |
| 210011_s_at | 2130   | <i>EWSR1</i>    | 6.85e-03 |
| 223892_s_at | 51643  | <i>TMBIM4</i>   | 6.85e-03 |
| 220720_x_at | 80097  | <i>MZT2B</i>    | 6.85e-03 |
| 212426_s_at | 10971  | <i>YWHAQ</i>    | 6.86e-03 |
| 226161_at   | 55676  | <i>SLC30A6</i>  | 6.86e-03 |
| 205851_at   | 10201  | <i>NME6</i>     | 6.87e-03 |
| 209593_s_at | 27348  | <i>TOR1B</i>    | 6.87e-03 |
| 202010_s_at | 57862  | <i>ZNF410</i>   | 6.87e-03 |
| 201597_at   | 1347   | <i>COX7A2</i>   | 6.88e-03 |
| 210878_s_at | 51780  | <i>KDM3B</i>    | 6.88e-03 |
| 235057_at   | 83737  | <i>ITCH</i>     | 6.88e-03 |
| 211085_s_at | 6789   | <i>STK4</i>     | 6.89e-03 |
| 215269_at   | 7109   | <i>TRAPPC10</i> | 6.89e-03 |
| 200850_s_at | 10768  | <i>AHCYLI</i>   | 6.89e-03 |

|             |        |                  |          |
|-------------|--------|------------------|----------|
| 219113_x_at | 51171  | <i>HSD17B14</i>  | 6.89e-03 |
| 215513_at   | 57061  | <i>HYMAI</i>     | 6.89e-03 |
| 221808_at   | 9367   | <i>RAB9A</i>     | 6.90e-03 |
| 228091_at   | 55014  | <i>STX17</i>     | 6.90e-03 |
| 1554455_at  | 55180  | <i>LINS</i>      | 6.90e-03 |
| 230986_at   | 11279  | <i>KLF8</i>      | 6.91e-03 |
| 204180_s_at | 23099  | <i>ZBTB43</i>    | 6.91e-03 |
| 223532_at   | 51239  | <i>ANKRD39</i>   | 6.91e-03 |
| 224635_s_at | 57448  | <i>BIRC6</i>     | 6.92e-03 |
| 242447_at   | 285382 | <i>C3orf70</i>   | 6.92e-03 |
| 228067_at   | 343990 | <i>KIAA1211L</i> | 6.93e-03 |
| 213473_at   | 8315   | <i>BRAP</i>      | 6.94e-03 |
| 208113_x_at | 5042   | <i>PABPC3</i>    | 6.95e-03 |
| 228968_at   | 203523 | <i>ZNF449</i>    | 6.95e-03 |
| 201446_s_at | 7072   | <i>TIA1</i>      | 6.96e-03 |
| 210213_s_at | 3692   | <i>EIF6</i>      | 6.97e-03 |
| 201023_at   | 6879   | <i>TAF7</i>      | 6.99e-03 |
| 209578_s_at | 23275  | <i>POFUT2</i>    | 6.99e-03 |
| 208904_s_at | 6234   | <i>RPS28</i>     | 7.01e-03 |
| 203737_s_at | 23082  | <i>PPRC1</i>     | 7.01e-03 |
| 238545_at   | 29117  | <i>BRD7</i>      | 7.02e-03 |
| 225735_at   | 57182  | <i>ANKRD50</i>   | 7.02e-03 |
| 230337_at   | 6654   | <i>SOS1</i>      | 7.03e-03 |
| 239762_at   | 286437 | <i>LOC286437</i> | 7.03e-03 |
| 225549_at   | 1656   | <i>DDX6</i>      | 7.04e-03 |
| 202282_at   | 3028   | <i>HSD17B10</i>  | 7.05e-03 |
| 202743_at   | 8503   | <i>PIK3R3</i>    | 7.06e-03 |
| 201833_at   | 3066   | <i>HDAC2</i>     | 7.07e-03 |
| 208398_s_at | 9519   | <i>TBPL1</i>     | 7.07e-03 |
| 204162_at   | 10403  | <i>NDC80</i>     | 7.07e-03 |
| 223430_at   | 23235  | <i>SIK2</i>      | 7.07e-03 |
| 210027_s_at | 328    | <i>APEX1</i>     | 7.08e-03 |
| 204458_at   | 23659  | <i>PLA2G15</i>   | 7.08e-03 |
| 235023_at   | 54832  | <i>VPS13C</i>    | 7.08e-03 |
| 204847_at   | 27107  | <i>ZBTB11</i>    | 7.09e-03 |
| 244822_at   | 2618   | <i>GART</i>      | 7.10e-03 |
| 232633_at   | 7520   | <i>XRCC5</i>     | 7.11e-03 |
| 211137_s_at | 27032  | <i>ATP2C1</i>    | 7.11e-03 |
| 224076_s_at | 54904  | <i>WHSC1L1</i>   | 7.11e-03 |
| 202599_s_at | 8204   | <i>NRIP1</i>     | 7.12e-03 |

|              |           |                 |          |
|--------------|-----------|-----------------|----------|
| 204761_at    | 9712      | <i>USP6NL</i>   | 7.12e-03 |
| 223244_s_at  | 55967     | <i>NDUFA12</i>  | 7.13e-03 |
| 234978_at    | 120103    | <i>SLC36A4</i>  | 7.13e-03 |
| 225535_s_at  | 100287932 | <i>TIMM23</i>   | 7.14e-03 |
| 201233_at    | 5719      | <i>PSMD13</i>   | 7.15e-03 |
| 226120_at    | 123016    | <i>TTC8</i>     | 7.15e-03 |
| 215308_at    | 2547      | <i>XRCC6</i>    | 7.16e-03 |
| 230056_at    | 2186      | <i>BPTF</i>     | 7.17e-03 |
| 200063_s_at  | 4869      | <i>NPM1</i>     | 7.17e-03 |
| 212534_at    | 7572      | <i>ZNF24</i>    | 7.18e-03 |
| 204510_at    | 8317      | <i>CDC7</i>     | 7.18e-03 |
| 202984_s_at  | 9529      | <i>BAG5</i>     | 7.18e-03 |
| 212139_at    | 10985     | <i>GCN1L1</i>   | 7.18e-03 |
| 203776_at    | 27238     | <i>GPKOW</i>    | 7.18e-03 |
| 1552426_a_at | 80213     | <i>TM2D3</i>    | 7.19e-03 |
| 230734_x_at  | 6801      | <i>STRN</i>     | 7.20e-03 |
| 225019_at    | 817       | <i>CAMK2D</i>   | 7.21e-03 |
| 214143_x_at  | 6152      | <i>RPL24</i>    | 7.21e-03 |
| 203743_s_at  | 6996      | <i>TDG</i>      | 7.21e-03 |
| 224691_at    | 127933    | <i>UHMK1</i>    | 7.21e-03 |
| 208012_x_at  | 3431      | <i>SP110</i>    | 7.23e-03 |
| 219208_at    | 80204     | <i>FBXO11</i>   | 7.23e-03 |
| 217608_at    | 285672    | <i>SREK1IP1</i> | 7.24e-03 |
| 225623_at    | 85457     | <i>KIAA1737</i> | 7.27e-03 |
| 222473_s_at  | 55914     | <i>ERBB2IP</i>  | 7.28e-03 |
| 241027_at    | 4976      | <i>OPA1</i>     | 7.29e-03 |
| 220143_x_at  | 55692     | <i>LUC7L</i>    | 7.29e-03 |
| 1554085_at   | 317781    | <i>DDX51</i>    | 7.29e-03 |
| 226463_at    | 528       | <i>ATP6VIC1</i> | 7.30e-03 |
| 207231_at    | 9666      | <i>DZIP3</i>    | 7.31e-03 |
| 219347_at    | 55270     | <i>NUDT15</i>   | 7.31e-03 |
| 232303_at    | 57507     | <i>ZNF608</i>   | 7.31e-03 |
| 221509_at    | 8562      | <i>DENR</i>     | 7.32e-03 |
| 1555837_s_at | 5431      | <i>POLR2B</i>   | 7.33e-03 |
| 229091_s_at  | 54619     | <i>CCNJ</i>     | 7.33e-03 |
| 200955_at    | 10989     | <i>IMMT</i>     | 7.34e-03 |
| 232520_s_at  | 55968     | <i>NSFL1C</i>   | 7.34e-03 |
| 235654_at    | 219854    | <i>TMEM218</i>  | 7.35e-03 |
| 235511_at    | 5936      | <i>RBM4</i>     | 7.36e-03 |
| 211537_x_at  | 6885      | <i>MAP3K7</i>   | 7.36e-03 |

|              |           |                     |          |
|--------------|-----------|---------------------|----------|
| 215716_s_at  | 490       | <i>ATP2B1</i>       | 7.37e-03 |
| 215575_at    | 9659      | <i>PDE4DIP</i>      | 7.37e-03 |
| 1554627_a_at | 51008     | <i>ASCC1</i>        | 7.37e-03 |
| 227402_s_at  | 84294     | <i>UTP23</i>        | 7.37e-03 |
| 212289_at    | 23253     | <i>ANKRD12</i>      | 7.38e-03 |
| 203377_s_at  | 51362     | <i>CDC40</i>        | 7.38e-03 |
| 214814_at    | 91746     | <i>YTHDC1</i>       | 7.38e-03 |
| 213346_at    | 93081     | <i>TEX30</i>        | 7.39e-03 |
| 221918_at    | 5128      | <i>CDK17</i>        | 7.40e-03 |
| 1556061_at   | 10556     | <i>RPP30</i>        | 7.40e-03 |
| 223560_s_at  | 55471     | <i>C2orf56</i>      | 7.44e-03 |
| 231878_at    | 79447     | <i>C16orf53</i>     | 7.44e-03 |
| 213302_at    | 5198      | <i>PFAS</i>         | 7.45e-03 |
| 218163_at    | 28985     | <i>MCTS1</i>        | 7.45e-03 |
| 217220_at    | 100287387 | <i>LOC100287387</i> | 7.45e-03 |
| 201752_s_at  | 120       | <i>ADD3</i>         | 7.46e-03 |
| 217985_s_at  | 11177     | <i>BAZIA</i>        | 7.46e-03 |
| 202133_at    | 25937     | <i>WWTR1</i>        | 7.46e-03 |
| 222875_at    | 56919     | <i>DHX33</i>        | 7.46e-03 |
| 201086_x_at  | 6651      | <i>SON</i>          | 7.47e-03 |
| 213793_s_at  | 9456      | <i>HOMER1</i>       | 7.47e-03 |
| 226475_at    | 55007     | <i>FAM118A</i>      | 7.47e-03 |
| 235406_x_at  | 100505894 | <i>TMEM161B-AS1</i> | 7.48e-03 |
| 229790_at    | 7014      | <i>TERF2</i>        | 7.49e-03 |
| 244293_at    | 7381      | <i>UQCRB</i>        | 7.49e-03 |
| 202487_s_at  | 94239     | <i>H2AFV</i>        | 7.49e-03 |
| 215199_at    | 800       | <i>CALD1</i>        | 7.50e-03 |
| 201795_at    | 3930      | <i>LBR</i>          | 7.50e-03 |
| 212265_at    | 9444      | <i>QKI</i>          | 7.51e-03 |
| 1552274_at   | 54899     | <i>PXK</i>          | 7.52e-03 |
| 209862_s_at  | 9702      | <i>CEP57</i>        | 7.53e-03 |
| 214985_at    | 2131      | <i>EXT1</i>         | 7.54e-03 |
| 218715_at    | 55813     | <i>UTP6</i>         | 7.55e-03 |
| 202968_s_at  | 8445      | <i>DYRK2</i>        | 7.56e-03 |
| 232304_at    | 57162     | <i>PEL1I</i>        | 7.57e-03 |
| 200978_at    | 4190      | <i>MDH1</i>         | 7.58e-03 |
| 208551_at    | 8369      | <i>HIST1H4G</i>     | 7.58e-03 |
| 200712_s_at  | 22919     | <i>MAPRE1</i>       | 7.59e-03 |
| 203333_at    | 22920     | <i>KIFAP3</i>       | 7.59e-03 |
| 232461_at    | 54806     | <i>AHII</i>         | 7.59e-03 |

|              |        |                  |          |
|--------------|--------|------------------|----------|
| 227224_at    | 55103  | <i>RALGPS2</i>   | 7.59e-03 |
| 205022_s_at  | 1112   | <i>FOXN3</i>     | 7.60e-03 |
| 211713_x_at  | 9768   | <i>KIAA0101</i>  | 7.61e-03 |
| 36553_at     | 8623   | <i>ASMTL</i>     | 7.62e-03 |
| 212040_at    | 10618  | <i>TGOLN2</i>    | 7.62e-03 |
| 204237_at    | 51454  | <i>GULP1</i>     | 7.62e-03 |
| 218374_s_at  | 57102  | <i>C12orf4</i>   | 7.62e-03 |
| 1559042_at   | 4712   | <i>NDUFB6</i>    | 7.63e-03 |
| 235348_at    | 84945  | <i>ABHD13</i>    | 7.63e-03 |
| 212556_at    | 23513  | <i>SCRIB</i>     | 7.64e-03 |
| 232431_at    | 2908   | <i>NR3C1</i>     | 7.65e-03 |
| 210755_at    | 3082   | <i>HGF</i>       | 7.65e-03 |
| 226767_s_at  | 81889  | <i>FAHD1</i>     | 7.65e-03 |
| 1554588_a_at | 150737 | <i>TTC30B</i>    | 7.65e-03 |
| 44669_at     | 644096 | <i>SDHAF1</i>    | 7.65e-03 |
| 202963_at    | 5993   | <i>RFX5</i>      | 7.66e-03 |
| 209184_s_at  | 8660   | <i>IRS2</i>      | 7.66e-03 |
| 237741_at    | 55186  | <i>SLC25A36</i>  | 7.66e-03 |
| 228908_s_at  | 642852 | <i>LOC642852</i> | 7.66e-03 |
| 211095_at    | 4763   | <i>NF1</i>       | 7.67e-03 |
| 52285_f_at   | 79959  | <i>CEP76</i>     | 7.67e-03 |
| 1569128_at   | 285237 | <i>C3orf38</i>   | 7.67e-03 |
| 201661_s_at  | 2181   | <i>ACSL3</i>     | 7.68e-03 |
| 227718_at    | 5814   | <i>PURB</i>      | 7.70e-03 |
| 208988_at    | 22992  | <i>KDM2A</i>     | 7.70e-03 |
| 219539_at    | 79833  | <i>GEMIN6</i>    | 7.71e-03 |
| 226276_at    | 153339 | <i>TMEM167A</i>  | 7.71e-03 |
| 230737_s_at  | 387647 | <i>LOC387647</i> | 7.71e-03 |
| 228315_at    | 64393  | <i>ZMAT3</i>     | 7.72e-03 |
| 208070_s_at  | 5980   | <i>REV3L</i>     | 7.74e-03 |
| 212405_s_at  | 51603  | <i>METTL13</i>   | 7.74e-03 |
| 212956_at    | 23158  | <i>TBC1D9</i>    | 7.75e-03 |
| 229211_at    | 285193 | <i>DUSP28</i>    | 7.75e-03 |
| 214430_at    | 2717   | <i>GLA</i>       | 7.76e-03 |
| 209913_x_at  | 9907   | <i>AP5Z1</i>     | 7.78e-03 |
| 224617_at    | 9991   | <i>PTBP3</i>     | 7.78e-03 |
| 233080_s_at  | 55660  | <i>PRPF40A</i>   | 7.78e-03 |
| 239212_at    | 84946  | <i>LTV1</i>      | 7.78e-03 |
| 201667_at    | 2697   | <i>GJA1</i>      | 7.79e-03 |
| 215285_s_at  | 10745  | <i>PHTF1</i>     | 7.79e-03 |

|              |        |                 |          |
|--------------|--------|-----------------|----------|
| 212782_x_at  | 5439   | <i>POLR2J</i>   | 7.80e-03 |
| 202683_s_at  | 8731   | <i>RNMT</i>     | 7.80e-03 |
| 213021_at    | 9527   | <i>GOSR1</i>    | 7.80e-03 |
| 215084_s_at  | 115353 | <i>LRRC42</i>   | 7.80e-03 |
| 228254_at    | 10254  | <i>STAM2</i>    | 7.83e-03 |
| 225989_at    | 26091  | <i>HERC4</i>    | 7.83e-03 |
| 224162_s_at  | 79791  | <i>FBXO31</i>   | 7.84e-03 |
| 202971_s_at  | 8445   | <i>DYRK2</i>    | 7.85e-03 |
| 233019_at    | 29883  | <i>CNOT7</i>    | 7.85e-03 |
| 235369_at    | 122525 | <i>C14orf28</i> | 7.85e-03 |
| 235709_at    | 283431 | <i>GAS2L3</i>   | 7.85e-03 |
| 202289_s_at  | 10579  | <i>TACC2</i>    | 7.86e-03 |
| 233226_at    | 5780   | <i>PTPN9</i>    | 7.87e-03 |
| 213552_at    | 26035  | <i>GLCE</i>     | 7.87e-03 |
| 238013_at    | 59339  | <i>PLEKHA2</i>  | 7.87e-03 |
| 225308_s_at  | 85461  | <i>TANC1</i>    | 7.87e-03 |
| 235352_at    | 3140   | <i>MRI</i>      | 7.88e-03 |
| 218032_at    | 8303   | <i>SNN</i>      | 7.88e-03 |
| 205655_at    | 4194   | <i>MDM4</i>     | 7.89e-03 |
| 204928_s_at  | 8273   | <i>SLC10A3</i>  | 7.89e-03 |
| 217863_at    | 8554   | <i>PIAS1</i>    | 7.89e-03 |
| 226609_at    | 285761 | <i>DCBLD1</i>   | 7.89e-03 |
| 225361_x_at  | 159090 | <i>FAM122B</i>  | 7.90e-03 |
| 203745_at    | 3052   | <i>HCCS</i>     | 7.91e-03 |
| 210840_s_at  | 8826   | <i>IQGAP1</i>   | 7.91e-03 |
| 228310_at    | 55740  | <i>ENAH</i>     | 7.91e-03 |
| 224677_x_at  | 280636 | <i>C11orf31</i> | 7.92e-03 |
| 207616_s_at  | 10010  | <i>TANK</i>     | 7.93e-03 |
| 201154_x_at  | 6124   | <i>RPL4</i>     | 7.94e-03 |
| 225999_at    | 57494  | <i>RIMKLB</i>   | 7.94e-03 |
| 201767_s_at  | 60528  | <i>ELAC2</i>    | 7.94e-03 |
| 205644_s_at  | 6637   | <i>SNRPG</i>    | 7.95e-03 |
| 209682_at    | 868    | <i>CBLB</i>     | 7.96e-03 |
| 231249_at    | 23334  | <i>SZT2</i>     | 7.96e-03 |
| 225405_at    | 221092 | <i>HNRNPUL2</i> | 7.96e-03 |
| 212441_at    | 9778   | <i>KIAA0232</i> | 7.97e-03 |
| 229099_at    | 790955 | <i>C11orf83</i> | 7.97e-03 |
| 209475_at    | 9958   | <i>USP15</i>    | 7.98e-03 |
| 222980_at    | 10890  | <i>RAB10</i>    | 7.98e-03 |
| 1557363_a_at | 55023  | <i>PHIP</i>     | 7.98e-03 |

|              |        |                  |          |
|--------------|--------|------------------|----------|
| 221276_s_at  | 81493  | <i>SYNC</i>      | 7.99e-03 |
| 217591_at    | 6498   | <i>SKIL</i>      | 8.00e-03 |
| 213118_at    | 23074  | <i>UHRF1BP1L</i> | 8.00e-03 |
| 226003_at    | 55605  | <i>KIF21A</i>    | 8.00e-03 |
| 1554283_at   | 25819  | <i>CCRN4L</i>    | 8.01e-03 |
| 225283_at    | 91947  | <i>ARRDC4</i>    | 8.01e-03 |
| 204595_s_at  | 6781   | <i>STC1</i>      | 8.02e-03 |
| 204089_x_at  | 4216   | <i>MAP3K4</i>    | 8.04e-03 |
| 234926_s_at  | 51507  | <i>C20orf43</i>  | 8.04e-03 |
| 201530_x_at  | 1973   | <i>EIF4A1</i>    | 8.05e-03 |
| 227150_at    | 4520   | <i>MTF1</i>      | 8.05e-03 |
| 205084_at    | 55973  | <i>BCAP29</i>    | 8.05e-03 |
| 201901_s_at  | 7528   | <i>YY1</i>       | 8.06e-03 |
| 204369_at    | 5290   | <i>PIK3CA</i>    | 8.07e-03 |
| 205315_s_at  | 6645   | <i>SNTB2</i>     | 8.07e-03 |
| 210600_s_at  | 2868   | <i>GRK4</i>      | 8.08e-03 |
| 201751_at    | 9929   | <i>JOSD1</i>     | 8.09e-03 |
| 225594_at    | 58487  | <i>CREBZF</i>    | 8.09e-03 |
| 236535_at    | 79677  | <i>SMC6</i>      | 8.09e-03 |
| 209472_at    | 56267  | <i>CCBL2</i>     | 8.11e-03 |
| 202863_at    | 6672   | <i>SP100</i>     | 8.13e-03 |
| 206081_at    | 9187   | <i>SLC24A1</i>   | 8.13e-03 |
| 222438_at    | 29079  | <i>MED4</i>      | 8.13e-03 |
| 201681_s_at  | 9231   | <i>DLG5</i>      | 8.14e-03 |
| 225192_at    | 143384 | <i>CACUL1</i>    | 8.14e-03 |
| 216044_x_at  | 388650 | <i>FAM69A</i>    | 8.14e-03 |
| 217257_at    | 6452   | <i>SH3BP2</i>    | 8.15e-03 |
| 1558136_s_at | 6882   | <i>TAF11</i>     | 8.15e-03 |
| 201780_s_at  | 11342  | <i>RNF13</i>     | 8.15e-03 |
| 236325_at    | 57562  | <i>KIAA1377</i>  | 8.15e-03 |
| 202298_at    | 4694   | <i>NDUFA1</i>    | 8.16e-03 |
| 202461_at    | 8892   | <i>EIF2B2</i>    | 8.16e-03 |
| 200033_at    | 1655   | <i>DDX5</i>      | 8.17e-03 |
| 208015_at    | 4086   | <i>SMAD1</i>     | 8.17e-03 |
| 212919_at    | 167227 | <i>DCP2</i>      | 8.17e-03 |
| 219362_at    | 60560  | <i>NAA35</i>     | 8.18e-03 |
| 31807_at     | 54555  | <i>DDX49</i>     | 8.19e-03 |
| 226072_at    | 197258 | <i>FUK</i>       | 8.19e-03 |
| 1557360_at   | 10128  | <i>LRPPRC</i>    | 8.21e-03 |
| 206752_s_at  | 1677   | <i>DFFB</i>      | 8.22e-03 |

|              |           |                     |          |
|--------------|-----------|---------------------|----------|
| 217792_at    | 27131     | <i>SNX5</i>         | 8.22e-03 |
| 1556222_at   | 285961    | <i>SEPT7L</i>       | 8.22e-03 |
| 1561965_at   | 6629      | <i>SNRPB2</i>       | 8.25e-03 |
| 218738_s_at  | 51444     | <i>RNF138</i>       | 8.26e-03 |
| 224580_at    | 81539     | <i>SLC38A1</i>      | 8.27e-03 |
| 226697_at    | 92689     | <i>FAM114A1</i>     | 8.28e-03 |
| 1553292_s_at | 124923    | <i>SGK494</i>       | 8.28e-03 |
| 206236_at    | 2828      | <i>GPR4</i>         | 8.29e-03 |
| 204662_at    | 9738      | <i>CCP110</i>       | 8.29e-03 |
| 212421_at    | 23313     | <i>KIAA0930</i>     | 8.29e-03 |
| 219482_at    | 54093     | <i>SETD4</i>        | 8.29e-03 |
| 237640_at    | 79609     | <i>METTL21D</i>     | 8.29e-03 |
| 214773_x_at  | 261726    | <i>TIPRL</i>        | 8.29e-03 |
| 203721_s_at  | 51096     | <i>UTP18</i>        | 8.30e-03 |
| 202160_at    | 1387      | <i>CREBBP</i>       | 8.31e-03 |
| 219303_at    | 79596     | <i>RNF219</i>       | 8.31e-03 |
| 228468_at    | 84930     | <i>MASTL</i>        | 8.31e-03 |
| 201377_at    | 9898      | <i>UBAP2L</i>       | 8.33e-03 |
| 224772_at    | 89796     | <i>NAVI</i>         | 8.34e-03 |
| 209824_s_at  | 406       | <i>ARNTL</i>        | 8.36e-03 |
| 212475_at    | 23080     | <i>AVL9</i>         | 8.36e-03 |
| 211501_s_at  | 8662      | <i>EIF3B</i>        | 8.37e-03 |
| 212308_at    | 23122     | <i>CLASP2</i>       | 8.37e-03 |
| 233087_at    | 64839     | <i>FBXL17</i>       | 8.38e-03 |
| 232014_at    | 90075     | <i>ZNF30</i>        | 8.38e-03 |
| 229253_at    | 117145    | <i>THEM4</i>        | 8.38e-03 |
| 203196_at    | 10257     | <i>ABCC4</i>        | 8.39e-03 |
| 224852_at    | 55761     | <i>TTC17</i>        | 8.39e-03 |
| 238960_s_at  | 113251    | <i>LARP4</i>        | 8.40e-03 |
| 207808_s_at  | 5627      | <i>PROS1</i>        | 8.41e-03 |
| 206898_at    | 28513     | <i>CDH19</i>        | 8.41e-03 |
| 227020_at    | 388403    | <i>YPEL2</i>        | 8.41e-03 |
| 209580_s_at  | 8930      | <i>MBD4</i>         | 8.42e-03 |
| 206580_s_at  | 30008     | <i>EFEMP2</i>       | 8.43e-03 |
| 201711_x_at  | 5903      | <i>RANBP2</i>       | 8.44e-03 |
| 1555560_at   | 55757     | <i>UGGT2</i>        | 8.44e-03 |
| 1558569_at   | 100131541 | <i>LOC100131541</i> | 8.44e-03 |
| 204227_s_at  | 7084      | <i>TK2</i>          | 8.45e-03 |
| 205672_at    | 7507      | <i>XPA</i>          | 8.46e-03 |
| 212373_at    | 10116     | <i>FEM1B</i>        | 8.46e-03 |



|              |           |                     |          |
|--------------|-----------|---------------------|----------|
| 202011_at    | 7082      | <i>TJP1</i>         | 8.47e-03 |
| 218768_at    | 57122     | <i>NUP107</i>       | 8.48e-03 |
| 232940_s_at  | 58508     | <i>MLL3</i>         | 8.48e-03 |
| 205550_s_at  | 9577      | <i>BRE</i>          | 8.50e-03 |
| 233595_at    | 9736      | <i>USP34</i>        | 8.50e-03 |
| 209149_s_at  | 10548     | <i>TM9SF1</i>       | 8.50e-03 |
| 212896_at    | 23517     | <i>SKIV2L2</i>      | 8.50e-03 |
| 223000_s_at  | 50848     | <i>F11R</i>         | 8.51e-03 |
| 204783_at    | 4291      | <i>MLF1</i>         | 8.52e-03 |
| 222602_at    | 55236     | <i>UBA6</i>         | 8.52e-03 |
| 228946_at    | 27152     | <i>INTU</i>         | 8.53e-03 |
| 218929_at    | 55602     | <i>CDKN2AIP</i>     | 8.53e-03 |
| 244871_s_at  | 84669     | <i>USP32</i>        | 8.53e-03 |
| 211452_x_at  | 9208      | <i>LRRFIP1</i>      | 8.54e-03 |
| 233438_at    | 57150     | <i>C6orf162</i>     | 8.54e-03 |
| 212299_at    | 91754     | <i>NEK9</i>         | 8.54e-03 |
| 216241_s_at  | 6917      | <i>TCEA1</i>        | 8.55e-03 |
| 202574_s_at  | 1455      | <i>CSNK1G2</i>      | 8.56e-03 |
| 1554271_a_at | 91687     | <i>CENPL</i>        | 8.56e-03 |
| 201664_at    | 10051     | <i>SMC4</i>         | 8.57e-03 |
| 220206_at    | 79830     | <i>ZMYM1</i>        | 8.57e-03 |
| 236669_at    | 100507495 | <i>SDCBP2-AS1</i>   | 8.58e-03 |
| 225114_at    | 8540      | <i>AGPS</i>         | 8.59e-03 |
| 240735_at    | 8476      | <i>CDC42BPA</i>     | 8.60e-03 |
| 1558467_a_at | 55757     | <i>UGGT2</i>        | 8.61e-03 |
| 223401_at    | 56985     | <i>ADPRM</i>        | 8.61e-03 |
| 229146_at    | 136895    | <i>C7orf31</i>      | 8.61e-03 |
| 204387_x_at  | 78988     | <i>MRP63</i>        | 8.62e-03 |
| 234947_s_at  | 63877     | <i>FAM204A</i>      | 8.63e-03 |
| 201599_at    | 4942      | <i>OAT</i>          | 8.64e-03 |
| 211956_s_at  | 10209     | <i>EIF1</i>         | 8.64e-03 |
| 215548_s_at  | 23256     | <i>SCFD1</i>        | 8.64e-03 |
| 218442_at    | 7268      | <i>TTC4</i>         | 8.66e-03 |
| 1559534_at   | 100996419 | <i>LOC100996419</i> | 8.66e-03 |
| 203336_s_at  | 9270      | <i>ITGB1BP1</i>     | 8.67e-03 |
| 214696_at    | 84981     | <i>MIR22HG</i>      | 8.67e-03 |
| 203232_s_at  | 6310      | <i>ATXN1</i>        | 8.68e-03 |
| 212458_at    | 200734    | <i>SPRED2</i>       | 8.68e-03 |
| 235122_at    | 59269     | <i>HIVEP3</i>       | 8.69e-03 |
| 207922_s_at  | 10296     | <i>MAEA</i>         | 8.71e-03 |

|              |        |                  |          |
|--------------|--------|------------------|----------|
| 211680_at    | 10611  | <i>PDLIM5</i>    | 8.71e-03 |
| 222715_s_at  | 11276  | <i>SYNRG</i>     | 8.71e-03 |
| 210829_s_at  | 23635  | <i>SSBP2</i>     | 8.71e-03 |
| 226607_at    | 25943  | <i>C20orf194</i> | 8.71e-03 |
| 225646_at    | 1075   | <i>CTSC</i>      | 8.72e-03 |
| 203630_s_at  | 10466  | <i>COG5</i>      | 8.72e-03 |
| 1559413_at   | 255394 | <i>TCP11L2</i>   | 8.72e-03 |
| 212104_s_at  | 23543  | <i>RBFOX2</i>    | 8.73e-03 |
| 211787_s_at  | 1973   | <i>EIF4A1</i>    | 8.74e-03 |
| 228334_x_at  | 80817  | <i>CEP44</i>     | 8.74e-03 |
| 226909_at    | 85460  | <i>ZNF518B</i>   | 8.74e-03 |
| 241379_at    | 200558 | <i>APLF</i>      | 8.74e-03 |
| 225040_s_at  | 6120   | <i>RPE</i>       | 8.76e-03 |
| 228287_at    | 84289  | <i>ING5</i>      | 8.76e-03 |
| 213379_at    | 27235  | <i>COQ2</i>      | 8.78e-03 |
| 202399_s_at  | 10239  | <i>AP3S2</i>     | 8.81e-03 |
| 1554966_a_at | 11259  | <i>FILIP1L</i>   | 8.81e-03 |
| 210498_at    | 1213   | <i>CLTC</i>      | 8.82e-03 |
| 205593_s_at  | 5152   | <i>PDE9A</i>     | 8.82e-03 |
| 202813_at    | 6894   | <i>TARBP1</i>    | 8.82e-03 |
| 220688_s_at  | 51154  | <i>MRT04</i>     | 8.82e-03 |
| 222428_s_at  | 51520  | <i>LARS</i>      | 8.82e-03 |
| 212641_at    | 3097   | <i>HIVEP2</i>    | 8.84e-03 |
| 223184_s_at  | 56894  | <i>AGPAT3</i>    | 8.84e-03 |
| 1569129_s_at | 285237 | <i>C3orf38</i>   | 8.84e-03 |
| 209649_at    | 10254  | <i>STAM2</i>     | 8.85e-03 |
| 221545_x_at  | 10025  | <i>MED16</i>     | 8.86e-03 |
| 201182_s_at  | 1108   | <i>CHD4</i>      | 8.88e-03 |
| 219848_s_at  | 9668   | <i>ZNF432</i>    | 8.88e-03 |
| 233124_s_at  | 55862  | <i>ECHDC1</i>    | 8.88e-03 |
| 222537_s_at  | 56882  | <i>CDC42SE1</i>  | 8.88e-03 |
| 239010_at    | 503639 | <i>DUXAP10</i>   | 8.88e-03 |
| 201615_x_at  | 800    | <i>CALD1</i>     | 8.89e-03 |
| 209744_x_at  | 83737  | <i>ITCH</i>      | 8.89e-03 |
| 226255_at    | 10009  | <i>ZBTB33</i>    | 8.91e-03 |
| 203723_at    | 3707   | <i>ITPKB</i>     | 8.92e-03 |
| 222014_x_at  | 25821  | <i>MTO1</i>      | 8.95e-03 |
| 213051_at    | 56829  | <i>ZC3HAV1</i>   | 8.95e-03 |
| 1556203_a_at | 23380  | <i>SRGAP2</i>    | 8.96e-03 |
| 214129_at    | 9659   | <i>PDE4DIP</i>   | 8.97e-03 |

|              |        |                  |          |
|--------------|--------|------------------|----------|
| 231713_s_at  | 55250  | <i>ELP2</i>      | 8.98e-03 |
| 212043_at    | 10618  | <i>TGOLN2</i>    | 8.99e-03 |
| 203583_at    | 25972  | <i>UNC50</i>     | 8.99e-03 |
| 243109_at    | 55784  | <i>MCTP2</i>     | 8.99e-03 |
| 212950_at    | 221395 | <i>GPR116</i>    | 8.99e-03 |
| 209412_at    | 7109   | <i>TRAPPC10</i>  | 9.01e-03 |
| 201487_at    | 1075   | <i>CTSC</i>      | 9.02e-03 |
| 235492_at    | 154214 | <i>RNF217</i>    | 9.02e-03 |
| 203323_at    | 858    | <i>CAV2</i>      | 9.03e-03 |
| 218068_s_at  | 79894  | <i>ZNF672</i>    | 9.04e-03 |
| 232291_at    | 407975 | <i>MIR17HG</i>   | 9.05e-03 |
| 200682_s_at  | 7332   | <i>UBE2L3</i>    | 9.08e-03 |
| 218652_s_at  | 54872  | <i>PIGG</i>      | 9.08e-03 |
| 209523_at    | 6873   | <i>TAF2</i>      | 9.09e-03 |
| 206158_s_at  | 7555   | <i>CNBP</i>      | 9.09e-03 |
| 235051_at    | 152137 | <i>CCDC50</i>    | 9.09e-03 |
| 241854_at    | 1773   | <i>DNASE1</i>    | 9.14e-03 |
| 202560_s_at  | 26097  | <i>CHTOP</i>     | 9.14e-03 |
| 228667_at    | 56895  | <i>AGPAT4</i>    | 9.14e-03 |
| 226753_at    | 143684 | <i>FAM76B</i>    | 9.14e-03 |
| 200963_x_at  | 6160   | <i>RPL31</i>     | 9.15e-03 |
| 222347_at    | 644450 | <i>LOC644450</i> | 9.15e-03 |
| 227069_at    | 1523   | <i>CUX1</i>      | 9.16e-03 |
| 205854_at    | 7289   | <i>TULP3</i>     | 9.16e-03 |
| 1559593_a_at | 9441   | <i>MED26</i>     | 9.16e-03 |
| 219806_s_at  | 56935  | <i>C11orf75</i>  | 9.18e-03 |
